# Supplementary material
Source: PubMed Central journal article supplement (PMC7610654)
Supplement: EMS117643-supplement-Supplementary_Tables.pdf [file EMS117643-supplement-Supplementary_Tables.pdf]

# ***HIGH CROSSOVER RATE1* encodes PROTEIN PHOSPHATASE X1 and restricts meiotic crossovers in Arabidopsis**

Divyashree C. Nageswaran<sup>1§</sup>, Jaeil Kim<sup>2§</sup>, Christophe Lambing<sup>1</sup>, Juhyun Kim<sup>2</sup>, Jihye Park<sup>2</sup>, Eun-Jung Kim<sup>2</sup>, Hyun Seob Cho<sup>2</sup>, Heejin Kim<sup>2</sup>, Dohwan Byun<sup>2</sup>, Yeong Mi Park<sup>2</sup>, Pallas Kuo<sup>1</sup>, Seungchul Lee<sup>2</sup>, Andrew J. Tock<sup>1</sup>, Xiaohui Zhao<sup>1</sup>, Ildoo Hwang<sup>2</sup>, Kyuha Choi<sup>1,2,\*</sup> and Ian R. Henderson<sup>1,\*</sup>

<sup>1</sup> Department of Plant Sciences, Downing Street, University of Cambridge, Cambridge, CB2 3EA, United Kingdom

<sup>2</sup> Department of Life Sciences, Pohang University of Science and Technology, Pohang, Gyeongbuk, Republic of Korea

§ Equal contribution

\* Correspondence: [kyuha@postech.ac.kr](mailto:kyuha@postech.ac.kr) and [irh25@cam.ac.uk](mailto:irh25@cam.ac.uk)

**Supplementary Tables 1 - 24**

**Supplementary Table 1. 420 crossover frequency in wild type, *fancm*, *hcr* and *lcr* mutants.** 420 crossover frequency was measured by analyzing counts of fluorescence and non-fluorescent seeds from 420/++ hemizygote plants, using CellProfiler<sup>1,2</sup>. In the seeds from self-fertilized 420/++ plants, CellProfiler determines the numbers of green-alone fluorescent seeds ( $N_{Green}$ ), red-alone fluorescent seeds ( $N_{Red}$ ) and total seeds ( $N_{Total}$ ). Crossover frequency (cM) is calculated using the formula:  $cM = 100 \times (1 - [1 - 2(N_{Green} + N_{Red})/N_{Total}]^{1/2})^{3,4}$ . To test for significant differences between wild type and mutants, *P* values were calculated using one-sided Welch's t-tests. G/nG shows the ratio of green color seed number (G) to non-green seed number (nG). R/nR indicates the ratio of red color seed number to non-red seed number.

| CTL | Genotype               | Green | Red | Both | None | Total | cM    | G/nG | R/nR | Mean  | SD   | <i>P</i> value         |
|-----|------------------------|-------|-----|------|------|-------|-------|------|------|-------|------|------------------------|
| 420 | Wild type              | 174   | 183 | 1432 | 381  | 2170  | 18.09 | 2.85 | 2.91 | 20.19 | 1.43 |                        |
| 420 | Wild type              | 214   | 229 | 1475 | 348  | 2266  | 21.96 | 2.93 | 3.03 |       |      |                        |
| 420 | Wild type              | 227   | 217 | 1513 | 359  | 2316  | 21.48 | 3.02 | 2.95 |       |      |                        |
| 420 | Wild type              | 141   | 156 | 1168 | 280  | 1745  | 18.78 | 3    | 3.14 |       |      |                        |
| 420 | Wild type              | 174   | 205 | 1398 | 362  | 2139  | 19.65 | 2.77 | 2.99 |       |      |                        |
| 420 | Wild type              | 204   | 197 | 1393 | 330  | 2124  | 21.11 | 3.03 | 2.98 |       |      |                        |
| 420 | Wild type              | 214   | 179 | 1438 | 329  | 2160  | 20.24 | 3.25 | 2.98 |       |      |                        |
| 420 | <i>lcr1 (taf4b-3)</i>  | 177   | 182 | 1834 | 499  | 2692  | 14.37 | 2.95 | 2.98 | 15.97 | 1.14 | $2.93 \times 10^{-5}$  |
| 420 | <i>lcr1 (taf4b-3)</i>  | 27    | 32  | 318  | 85   | 462   | 13.71 | 2.95 | 3.13 |       |      |                        |
| 420 | <i>lcr1 (taf4b-3)</i>  | 176   | 187 | 1584 | 400  | 2347  | 16.89 | 3    | 3.07 |       |      |                        |
| 420 | <i>lcr1 (taf4b-3)</i>  | 191   | 193 | 1631 | 422  | 2437  | 17.24 | 2.96 | 2.98 |       |      |                        |
| 420 | <i>lcr1 (taf4b-3)</i>  | 157   | 155 | 1477 | 373  | 2162  | 15.66 | 3.09 | 3.08 |       |      |                        |
| 420 | <i>lcr1 (taf4b-3)</i>  | 155   | 185 | 1613 | 433  | 2386  | 15.44 | 2.86 | 3.06 |       |      |                        |
| 420 | <i>lcr1 (taf4b-3)</i>  | 169   | 183 | 1550 | 411  | 2313  | 16.6  | 2.89 | 2.99 |       |      |                        |
| 420 | <i>lcr1 (taf4b-3)</i>  | 127   | 144 | 1217 | 328  | 1816  | 16.24 | 2.85 | 2.99 |       |      |                        |
| 420 | <i>lcr1 (taf4b-3)</i>  | 181   | 179 | 1497 | 429  | 2286  | 17.23 | 2.76 | 2.75 |       |      |                        |
| 420 | <i>lcr1 (taf4b-3)</i>  | 161   | 166 | 1618 | 410  | 2355  | 15.01 | 3.09 | 3.12 |       |      |                        |
| 420 | <i>lcr1 (taf4b-3)</i>  | 140   | 142 | 1213 | 330  | 1825  | 16.88 | 2.87 | 2.88 |       |      |                        |
| 420 | <i>lcr1 (taf4b-3)</i>  | 158   | 172 | 1543 | 464  | 2337  | 15.29 | 2.67 | 2.76 |       |      |                        |
| 420 | <i>lcr1 (taf4b-3)</i>  | 95    | 109 | 811  | 247  | 1262  | 17.74 | 2.54 | 2.69 |       |      |                        |
| 420 | <i>lcr1 (taf4b-3)</i>  | 198   | 177 | 1659 | 382  | 2416  | 16.96 | 3.32 | 3.17 |       |      |                        |
| 420 | <i>lcr1 (taf4b-3)</i>  | 182   | 166 | 1537 | 445  | 2330  | 16.26 | 2.81 | 2.72 |       |      |                        |
| 420 | <i>lcr1 (taf4b-3)</i>  | 150   | 159 | 1491 | 392  | 2192  | 15.26 | 2.98 | 3.04 |       |      |                        |
| 420 | <i>lcr1 (taf4b-3)</i>  | 154   | 171 | 1568 | 479  | 2372  | 14.8  | 2.65 | 2.75 |       |      |                        |
| 420 | <i>fancm-1</i>         | 285   | 259 | 1140 | 212  | 1896  | 34.72 | 3.03 | 2.81 | 34.55 | 1.31 | $1.02 \times 10^{-10}$ |
| 420 | <i>fancm-1</i>         | 271   | 275 | 1110 | 229  | 1885  | 35.14 | 2.74 | 2.77 |       |      |                        |
| 420 | <i>fancm-1</i>         | 229   | 222 | 1038 | 190  | 1679  | 31.97 | 3.08 | 3.01 |       |      |                        |
| 420 | <i>fancm-1</i>         | 221   | 221 | 883  | 181  | 1506  | 35.73 | 2.75 | 2.75 |       |      |                        |
| 420 | <i>fancm-1</i>         | 239   | 239 | 1025 | 186  | 1689  | 34.12 | 2.97 | 2.97 |       |      |                        |
| 420 | <i>fancm-1</i>         | 253   | 220 | 1020 | 171  | 1664  | 34.31 | 3.26 | 2.92 |       |      |                        |
| 420 | <i>fancm-1</i>         | 209   | 190 | 821  | 137  | 1357  | 35.82 | 3.15 | 2.92 |       |      |                        |
| 420 | <i>hcr4 (fancm-11)</i> | 273   | 273 | 1140 | 199  | 1885  | 35.14 | 2.99 | 2.99 | 34.37 | 2.59 | $1.86 \times 10^{-6}$  |
| 420 | <i>hcr4 (fancm-11)</i> | 290   | 284 | 1340 | 263  | 2177  | 31.25 | 2.98 | 2.94 |       |      |                        |
| 420 | <i>hcr4 (fancm-11)</i> | 216   | 234 | 991  | 190  | 1631  | 33.05 | 2.85 | 3.02 |       |      |                        |
| 420 | <i>hcr4 (fancm-11)</i> | 239   | 250 | 1076 | 187  | 1752  | 33.53 | 3.01 | 3.11 |       |      |                        |
| 420 | <i>hcr4 (fancm-11)</i> | 260   | 255 | 1134 | 163  | 1812  | 34.31 | 3.33 | 3.28 |       |      |                        |

|     |                                   |     |     |      |     |      |       |      |      |       |      |                                                                                                              |
|-----|-----------------------------------|-----|-----|------|-----|------|-------|------|------|-------|------|--------------------------------------------------------------------------------------------------------------|
| 420 | <i>hcr4 (fancm-11)</i>            | 292 | 321 | 1150 | 192 | 1955 | 38.94 | 2.81 | 3.04 |       |      |                                                                                                              |
| 420 | <i>hcr1</i>                       | 310 | 309 | 1576 | 330 | 2525 | 28.61 | 2.95 | 2.95 | 27.84 | 0.44 | $1.20 \times 10^{-6}$                                                                                        |
| 420 | <i>hcr1</i>                       | 246 | 278 | 1394 | 282 | 2200 | 27.64 | 2.93 | 3.17 |       |      |                                                                                                              |
| 420 | <i>hcr1</i>                       | 242 | 250 | 1274 | 275 | 2041 | 28.04 | 2.89 | 2.95 |       |      |                                                                                                              |
| 420 | <i>hcr1</i>                       | 257 | 267 | 1387 | 275 | 2186 | 27.85 | 3.03 | 3.11 |       |      |                                                                                                              |
| 420 | <i>hcr1</i>                       | 281 | 278 | 1470 | 291 | 2320 | 28.02 | 3.08 | 3.06 |       |      |                                                                                                              |
| 420 | <i>hcr1</i>                       | 261 | 270 | 1418 | 290 | 2239 | 27.5  | 3    | 3.06 |       |      |                                                                                                              |
| 420 | <i>hcr1</i>                       | 265 | 241 | 1383 | 262 | 2151 | 27.23 | 3.28 | 3.08 |       |      |                                                                                                              |
| 420 | <i>hcr2</i>                       | 536 | 507 | 2228 | 380 | 3651 | 34.53 | 3.12 | 2.99 | 35.35 | 2.05 | $3.84 \times 10^{-9}$                                                                                        |
| 420 | <i>hcr2</i>                       | 538 | 523 | 2174 | 395 | 3630 | 35.55 | 2.95 | 2.89 |       |      |                                                                                                              |
| 420 | <i>hcr2</i>                       | 502 | 565 | 2252 | 413 | 3732 | 34.56 | 2.82 | 3.08 |       |      |                                                                                                              |
| 420 | <i>hcr2</i>                       | 488 | 486 | 1915 | 345 | 3234 | 36.94 | 2.89 | 2.88 |       |      |                                                                                                              |
| 420 | <i>hcr2</i>                       | 538 | 567 | 2145 | 415 | 3665 | 36.99 | 2.73 | 2.85 |       |      |                                                                                                              |
| 420 | <i>hcr2</i>                       | 520 | 573 | 2139 | 366 | 3598 | 37.35 | 2.83 | 3.06 |       |      |                                                                                                              |
| 420 | <i>hcr2</i>                       | 453 | 451 | 2146 | 355 | 3405 | 31.52 | 3.22 | 3.21 |       |      |                                                                                                              |
| 420 | <i>hcr3</i>                       | 290 | 284 | 1340 | 263 | 2177 | 31.25 | 2.98 | 2.94 | 31.47 | 1.32 | $1.69 \times 10^{-9}$                                                                                        |
| 420 | <i>hcr3</i>                       | 258 | 265 | 1281 | 230 | 2034 | 30.3  | 3.11 | 3.17 |       |      |                                                                                                              |
| 420 | <i>hcr3</i>                       | 281 | 293 | 1268 | 229 | 2071 | 33.24 | 2.97 | 3.06 |       |      |                                                                                                              |
| 420 | <i>hcr3</i>                       | 253 | 257 | 1168 | 269 | 1947 | 31    | 2.7  | 2.73 |       |      |                                                                                                              |
| 420 | <i>hcr3</i>                       | 288 | 258 | 1270 | 241 | 2057 | 31.51 | 3.12 | 2.89 |       |      |                                                                                                              |
| 420 | <i>hcr3</i>                       | 278 | 282 | 1374 | 274 | 2208 | 29.8  | 2.97 | 3    |       |      |                                                                                                              |
| 420 | <i>hcr3</i>                       | 299 | 265 | 1244 | 229 | 2037 | 33.2  | 3.12 | 2.86 |       |      |                                                                                                              |
| 420 | <i>hcr4/fancm-1 F<sub>1</sub></i> | 215 | 159 | 768  | 185 | 1327 | 33.95 | 2.86 | 2.32 | 34.24 | 0.91 | $2.39 \times 10^{-9}$<br>Between <i>fancm-1</i> and $F_1 = 0.68$<br>Between <i>fancm-11</i> and $F_1 = 0.55$ |
| 420 | <i>hcr4/fancm-1 F<sub>1</sub></i> | 331 | 292 | 1341 | 197 | 2161 | 34.93 | 3.42 | 3.09 |       |      |                                                                                                              |
| 420 | <i>hcr4/fancm-1 F<sub>1</sub></i> | 212 | 232 | 927  | 171 | 1542 | 34.88 | 2.83 | 3.03 |       |      |                                                                                                              |
| 420 | <i>hcr4/fancm-1 F<sub>1</sub></i> | 287 | 295 | 1309 | 235 | 2126 | 32.73 | 3.01 | 3.07 |       |      |                                                                                                              |
| 420 | <i>hcr4/fancm-1 F<sub>1</sub></i> | 130 | 128 | 524  | 112 | 894  | 34.98 | 2.73 | 2.69 |       |      |                                                                                                              |
| 420 | <i>hcr4/fancm-1 F<sub>1</sub></i> | 212 | 232 | 927  | 171 | 1542 | 34.88 | 2.83 | 3.03 |       |      |                                                                                                              |
| 420 | <i>hcr4/fancm-1 F<sub>1</sub></i> | 333 | 311 | 1435 | 237 | 2316 | 33.38 | 3.23 | 3.06 |       |      |                                                                                                              |

**Supplementary Table 2. 420 crossover frequency in wild type, *taf4b-1*, *lcr1* and *taf4b-1/lcr1* hybrid plants.** 420 crossover frequency was measured by analyzing counts of fluorescence and non-fluorescent seeds from 420/++ hemizygote plants, using CellProfiler<sup>1,2</sup>. In the seeds from self-fertilized 420/++ plants, CellProfiler determines the numbers of green-alone fluorescent seeds ( $N_{\text{Green}}$ ), red-alone fluorescent seeds ( $N_{\text{Red}}$ ) and total seeds ( $N_{\text{Total}}$ ). Crossover frequency (cM) is calculated using the formula:  $\text{cM} = 100 \times (1 - [1 - 2(N_{\text{Green}} + N_{\text{Red}})/N_{\text{Total}}]^{1/2})^{3,4}$ . To test for significant differences between genotypes, *P* values were calculated using one-sided Welch's t-tests.

| Genotype               | Green | Red | Both | None | Total | cM    | G/nG | R/nR | Mean  | SD   | <i>P</i> value         |
|------------------------|-------|-----|------|------|-------|-------|------|------|-------|------|------------------------|
| Wild type              | 211   | 220 | 1819 | 446  | 2696  | 17.52 | 3.05 | 3.1  | 18.33 | 1.14 |                        |
| Wild type              | 224   | 203 | 1729 | 471  | 2627  | 17.85 | 2.9  | 2.78 |       |      |                        |
| Wild type              | 215   | 218 | 1646 | 450  | 2529  | 18.91 | 2.79 | 2.8  |       |      |                        |
| Wild type              | 219   | 228 | 1658 | 490  | 2595  | 19.04 | 2.61 | 2.66 |       |      |                        |
| Wild type              | 209   | 188 | 1648 | 453  | 2498  | 17.41 | 2.9  | 2.77 |       |      |                        |
| Wild type              | 190   | 183 | 1591 | 406  | 2370  | 17.22 | 3.02 | 2.98 |       |      |                        |
| Wild type              | 239   | 189 | 1643 | 388  | 2459  | 19.26 | 3.26 | 2.92 |       |      |                        |
| Wild type              | 128   | 101 | 976  | 273  | 1478  | 16.93 | 2.95 | 2.69 |       |      |                        |
| Wild type              | 190   | 206 | 1465 | 370  | 2231  | 19.69 | 2.87 | 2.98 |       |      |                        |
| Wild type              | 145   | 136 | 1160 | 319  | 1760  | 17.5  | 2.87 | 2.79 |       |      |                        |
| Wild type              | 242   | 202 | 1588 | 402  | 2434  | 20.3  | 3.03 | 2.78 |       |      |                        |
| <i>taf4b-1/taf4b-1</i> | 188   | 166 | 1584 | 410  | 2348  | 16.43 | 3.08 | 2.93 | 14.32 | 0.98 | $1.66 \times 10^{-7}$  |
| <i>taf4b-1/taf4b-1</i> | 129   | 168 | 1534 | 419  | 2250  | 14.21 | 2.83 | 3.11 |       |      |                        |
| <i>taf4b-1/taf4b-1</i> | 138   | 161 | 1551 | 447  | 2297  | 14    | 2.78 | 2.93 |       |      |                        |
| <i>taf4b-1/taf4b-1</i> | 156   | 165 | 1585 | 462  | 2368  | 14.63 | 2.78 | 2.83 |       |      |                        |
| <i>taf4b-1/taf4b-1</i> | 162   | 127 | 1457 | 410  | 2156  | 14.45 | 3.01 | 2.77 |       |      |                        |
| <i>taf4b-1/taf4b-1</i> | 142   | 131 | 1536 | 437  | 2246  | 13    | 2.95 | 2.88 |       |      |                        |
| <i>taf4b-1/taf4b-1</i> | 126   | 161 | 1532 | 405  | 2224  | 13.87 | 2.93 | 3.19 |       |      |                        |
| <i>taf4b-1/taf4b-1</i> | 158   | 126 | 1445 | 452  | 2181  | 14    | 2.77 | 2.58 |       |      |                        |
| <i>lcr1lcr1</i>        | 153   | 178 | 1682 | 410  | 2423  | 14.75 | 3.12 | 3.3  | 16.13 | 0.94 | $2.44 \times 10^{-4}$  |
| <i>lcr1lcr1</i>        | 167   | 169 | 1432 | 405  | 2173  | 16.89 | 2.79 | 2.8  |       |      |                        |
| <i>lcr1lcr1</i>        | 79    | 78  | 722  | 217  | 1096  | 15.53 | 2.72 | 2.7  |       |      |                        |
| <i>lcr1lcr1</i>        | 152   | 163 | 1440 | 371  | 2126  | 16.12 | 2.98 | 3.07 |       |      |                        |
| <i>lcr1lcr1</i>        | 153   | 170 | 1420 | 366  | 2109  | 16.71 | 2.93 | 3.06 |       |      |                        |
| <i>lcr1lcr1</i>        | 187   | 198 | 1599 | 436  | 2420  | 17.43 | 2.82 | 2.88 |       |      |                        |
| <i>lcr1lcr1</i>        | 77    | 97  | 783  | 262  | 1219  | 15.47 | 2.4  | 2.6  |       |      |                        |
| <i>lcr1/taf4b-1</i>    | 143   | 152 | 1809 | 473  | 2577  | 12.19 | 3.12 | 3.18 | 13.11 | 0.66 | $4.03 \times 10^{-10}$ |
| <i>lcr1/taf4b-1</i>    | 145   | 132 | 1647 | 465  | 2389  | 12.36 | 3    | 2.92 |       |      |                        |
| <i>lcr1/taf4b-1</i>    | 149   | 147 | 1630 | 509  | 2435  | 13    | 2.71 | 2.7  |       |      |                        |
| <i>lcr1/taf4b-1</i>    | 151   | 132 | 1614 | 424  | 2321  | 13.04 | 3.17 | 3.04 |       |      |                        |
| <i>lcr1/taf4b-1</i>    | 133   | 154 | 1642 | 420  | 2349  | 13.07 | 3.09 | 3.25 |       |      |                        |
| <i>lcr1/taf4b-1</i>    | 171   | 164 | 1857 | 523  | 2715  | 13.21 | 2.95 | 2.91 |       |      |                        |
| <i>lcr1/taf4b-1</i>    | 171   | 173 | 1780 | 541  | 2665  | 13.87 | 2.73 | 2.74 |       |      |                        |
| <i>lcr1/taf4b-1</i>    | 168   | 129 | 1535 | 433  | 2265  | 14.11 | 3.03 | 2.77 |       |      |                        |

**Supplementary Table 3. 420 crossover frequency in wild type (Col), *hcr1*, *hcr1/+* and high recombination *hcr1* BC<sub>1</sub>F<sub>2</sub> individuals.** 420 crossover frequency was measured by analyzing counts of fluorescence and non-fluorescent seeds from 420/++ hemizygote plants, using CellProfiler<sup>1,2</sup>. In the seeds from self-fertilized 420/++ plants, CellProfiler determines the numbers of green-alone fluorescent seeds (N<sub>Green</sub>), red-alone fluorescent seeds (N<sub>Red</sub>) and total seeds (N<sub>Total</sub>). Crossover frequency (cM) is calculated using the formula:  $cM = 100 \times (1 - [1 - 2(N_{Green} + N_{Red})/N_{Total}]^{1/2})^{3,4}$ . To test for significant differences between genotypes, *P* values were calculated using one-sided Welch's t-tests.

| Genotype                                   | Green | Red | Both | None | Total | cM    | G/nG | R/nR | Mean  | SD   | <i>P</i> value         |
|--------------------------------------------|-------|-----|------|------|-------|-------|------|------|-------|------|------------------------|
| Wild type                                  | 158   | 130 | 998  | 278  | 1564  | 20.52 | 2.83 | 2.59 | 20.72 | 0.84 |                        |
| Wild type                                  | 167   | 184 | 1335 | 316  | 2002  | 19.42 | 3    | 3.14 |       |      |                        |
| Wild type                                  | 182   | 172 | 1310 | 322  | 1986  | 19.78 | 3.02 | 2.94 |       |      |                        |
| Wild type                                  | 245   | 232 | 1619 | 396  | 2492  | 21.44 | 2.97 | 2.89 |       |      |                        |
| Wild type                                  | 148   | 180 | 1133 | 306  | 1767  | 20.71 | 2.64 | 2.89 |       |      |                        |
| Wild type                                  | 179   | 171 | 1176 | 309  | 1835  | 21.35 | 2.82 | 2.76 |       |      |                        |
| Wild type                                  | 217   | 166 | 1364 | 357  | 2104  | 20.25 | 3.02 | 2.67 |       |      |                        |
| Wild type                                  | 164   | 207 | 1321 | 358  | 2050  | 20.12 | 2.63 | 2.93 |       |      |                        |
| Wild type                                  | 215   | 219 | 1478 | 333  | 2245  | 21.68 | 3.07 | 3.1  |       |      |                        |
| Wild type                                  | 226   | 266 | 1624 | 409  | 2525  | 21.88 | 2.74 | 2.98 |       |      |                        |
| <i>hcr1-1/+</i>                            | 209   | 208 | 1436 | 352  | 2205  | 21.15 | 2.94 | 2.93 | 20.99 | 0.7  | 0.241                  |
| <i>hcr1-1/+</i>                            | 203   | 215 | 1473 | 351  | 2242  | 20.81 | 2.96 | 3.05 |       |      |                        |
| <i>hcr1-1/+</i>                            | 231   | 211 | 1548 | 388  | 2378  | 20.74 | 2.97 | 2.84 |       |      |                        |
| <i>hcr1-1/+</i>                            | 217   | 243 | 1600 | 392  | 2452  | 20.96 | 2.86 | 3.03 |       |      |                        |
| <i>hcr1-1/+</i>                            | 211   | 248 | 1596 | 405  | 2460  | 20.83 | 2.77 | 2.99 |       |      |                        |
| <i>hcr1-1/+</i>                            | 241   | 241 | 1546 | 399  | 2427  | 22.36 | 2.79 | 2.79 |       |      |                        |
| <i>hcr1-1/+</i>                            | 101   | 120 | 817  | 187  | 1225  | 20.05 | 2.99 | 3.25 |       |      |                        |
| <i>hcr1-1</i>                              | 181   | 191 | 1027 | 229  | 1628  | 26.31 | 2.88 | 2.97 | 27.32 | 1.22 | 8.64×10 <sup>-10</sup> |
| <i>hcr1-1</i>                              | 232   | 191 | 1136 | 258  | 1817  | 26.9  | 3.05 | 2.71 |       |      |                        |
| <i>hcr1-1</i>                              | 208   | 204 | 1195 | 245  | 1852  | 25.5  | 3.12 | 3.09 |       |      |                        |
| <i>hcr1-1</i>                              | 429   | 446 | 962  | 37   | 1874  | 25.8  | 2.88 | 3.02 |       |      |                        |
| <i>hcr1-1</i>                              | 245   | 279 | 1362 | 271  | 2157  | 28.3  | 2.92 | 3.18 |       |      |                        |
| <i>hcr1-1</i>                              | 224   | 238 | 1187 | 254  | 1903  | 28.27 | 2.87 | 2.98 |       |      |                        |
| <i>hcr1-1</i>                              | 283   | 322 | 1565 | 337  | 2507  | 28.07 | 2.8  | 3.04 |       |      |                        |
| <i>hcr1-1</i>                              | 276   | 281 | 1430 | 330  | 2317  | 27.94 | 2.79 | 2.82 |       |      |                        |
| <i>hcr1-1</i>                              | 242   | 208 | 1133 | 242  | 1825  | 28.81 | 3.06 | 2.77 |       |      |                        |
| <i>hcr1</i> BC <sub>1</sub> F <sub>2</sub> | 180   | 213 | 976  | 185  | 1554  | 29.7  | 2.9  | 3.26 | 28.79 | 0.85 | 3.22×10 <sup>-13</sup> |
| <i>hcr1</i> BC <sub>1</sub> F <sub>2</sub> | 266   | 253 | 1294 | 272  | 2085  | 29.14 | 2.97 | 2.88 |       |      |                        |
| <i>hcr1</i> BC <sub>1</sub> F <sub>2</sub> | 248   | 263 | 1293 | 292  | 2096  | 28.42 | 2.78 | 2.88 |       |      |                        |
| <i>hcr1</i> BC <sub>1</sub> F <sub>2</sub> | 270   | 290 | 1466 | 276  | 2302  | 28.34 | 3.07 | 3.22 |       |      |                        |
| <i>hcr1</i> BC <sub>1</sub> F <sub>2</sub> | 272   | 298 | 1475 | 300  | 2345  | 28.32 | 2.92 | 3.1  |       |      |                        |
| <i>hcr1</i> BC <sub>1</sub> F <sub>2</sub> | 157   | 190 | 916  | 201  | 1464  | 27.48 | 2.74 | 3.09 |       |      |                        |
| <i>hcr1</i> BC <sub>1</sub> F <sub>2</sub> | 162   | 159 | 750  | 191  | 1262  | 29.91 | 2.61 | 2.58 |       |      |                        |
| <i>hcr1</i> BC <sub>1</sub> F <sub>2</sub> | 223   | 213 | 1093 | 203  | 1732  | 29.53 | 3.16 | 3.07 |       |      |                        |
| <i>hcr1</i> BC <sub>1</sub> F <sub>2</sub> | 307   | 306 | 1518 | 340  | 2471  | 29.02 | 2.83 | 2.82 |       |      |                        |
| <i>hcr1</i> BC <sub>1</sub> F <sub>2</sub> | 276   | 295 | 1427 | 314  | 2312  | 28.86 | 2.8  | 2.92 |       |      |                        |
| <i>hcr1</i> BC <sub>1</sub> F <sub>2</sub> | 265   | 306 | 1469 | 323  | 2363  | 28.12 | 2.76 | 3.02 |       |      |                        |

|                                          |     |     |      |     |      |       |      |      |
|------------------------------------------|-----|-----|------|-----|------|-------|------|------|
| <i>hcr1 BC<sub>1</sub> F<sub>2</sub></i> | 186 | 168 | 934  | 180 | 1468 | 28.05 | 3.22 | 3.01 |
| <i>hcr1 BC<sub>1</sub> F<sub>2</sub></i> | 324 | 298 | 1554 | 316 | 2492 | 29.23 | 3.06 | 2.89 |
| <i>hcr1 BC<sub>1</sub> F<sub>2</sub></i> | 293 | 288 | 1448 | 321 | 2350 | 28.9  | 2.86 | 2.83 |
| <i>hcr1 BC<sub>1</sub> F<sub>2</sub></i> | 147 | 146 | 754  | 147 | 1194 | 28.64 | 3.08 | 3.06 |
| <i>hcr1 BC<sub>1</sub> F<sub>2</sub></i> | 290 | 310 | 1555 | 346 | 2501 | 27.88 | 2.81 | 2.93 |
| <i>hcr1 BC<sub>1</sub> F<sub>2</sub></i> | 298 | 288 | 1555 | 312 | 2453 | 27.74 | 3.09 | 3.02 |
| <i>hcr1 BC<sub>1</sub> F<sub>2</sub></i> | 244 | 268 | 1257 | 279 | 2048 | 29.29 | 2.74 | 2.92 |
| <i>hcr1 BC<sub>1</sub> F<sub>2</sub></i> | 544 | 554 | 1263 | 37  | 2398 | 29.02 | 3.06 | 3.13 |
| <i>hcr1 BC<sub>1</sub> F<sub>2</sub></i> | 274 | 297 | 1431 | 308 | 2310 | 28.89 | 2.82 | 2.97 |
| <i>hcr1 BC<sub>1</sub> F<sub>2</sub></i> | 141 | 152 | 731  | 175 | 1199 | 28.5  | 2.67 | 2.79 |
| <i>hcr1 BC<sub>1</sub> F<sub>2</sub></i> | 211 | 188 | 1050 | 208 | 1657 | 28.0  | 3.18 | 2.95 |
| <i>hcr1 BC<sub>1</sub> F<sub>2</sub></i> | 274 | 274 | 1422 | 307 | 2277 | 27.98 | 2.92 | 2.92 |
| <i>hcr1 BC<sub>1</sub> F<sub>2</sub></i> | 164 | 166 | 879  | 170 | 1379 | 27.79 | 3.1  | 3.13 |
| <i>hcr1 BC<sub>1</sub> F<sub>2</sub></i> | 294 | 278 | 1395 | 354 | 2321 | 28.79 | 2.67 | 2.58 |
| <i>hcr1 BC<sub>1</sub> F<sub>2</sub></i> | 220 | 210 | 1096 | 223 | 1749 | 28.71 | 3.04 | 2.95 |
| <i>hcr1 BC<sub>1</sub> F<sub>2</sub></i> | 300 | 284 | 1426 | 375 | 2385 | 28.57 | 2.62 | 2.53 |
| <i>hcr1 BC<sub>1</sub> F<sub>2</sub></i> | 300 | 282 | 1532 | 323 | 2437 | 27.73 | 3.03 | 2.91 |
| <i>hcr1 BC<sub>1</sub> F<sub>2</sub></i> | 270 | 267 | 1411 | 318 | 2266 | 27.47 | 2.87 | 2.85 |
| <i>hcr1 BC<sub>1</sub> F<sub>2</sub></i> | 314 | 282 | 1569 | 365 | 2530 | 27.28 | 2.91 | 2.73 |
| <i>hcr1 BC<sub>1</sub> F<sub>2</sub></i> | 263 | 296 | 1507 | 311 | 2377 | 27.22 | 2.92 | 3.14 |
| <i>hcr1 BC<sub>1</sub> F<sub>2</sub></i> | 285 | 265 | 1258 | 278 | 2086 | 31.25 | 2.84 | 2.71 |
| <i>hcr1 BC<sub>1</sub> F<sub>2</sub></i> | 274 | 262 | 1281 | 293 | 2110 | 29.86 | 2.8  | 2.72 |
| <i>hcr1 BC<sub>1</sub> F<sub>2</sub></i> | 236 | 236 | 1165 | 223 | 1860 | 29.82 | 3.05 | 3.05 |
| <i>hcr1 BC<sub>1</sub> F<sub>2</sub></i> | 194 | 228 | 1058 | 238 | 1718 | 28.67 | 2.69 | 2.98 |
| <i>hcr1 BC<sub>1</sub> F<sub>2</sub></i> | 292 | 291 | 1469 | 322 | 2374 | 28.67 | 2.87 | 2.87 |
| <i>hcr1 BC<sub>1</sub> F<sub>2</sub></i> | 302 | 265 | 1428 | 323 | 2318 | 28.53 | 2.94 | 2.71 |
| <i>hcr1 BC<sub>1</sub> F<sub>2</sub></i> | 295 | 310 | 1539 | 331 | 2475 | 28.51 | 2.86 | 2.95 |
| <i>hcr1 BC<sub>1</sub> F<sub>2</sub></i> | 297 | 309 | 1573 | 315 | 2494 | 28.3  | 3    | 3.08 |
| <i>hcr1 BC<sub>1</sub> F<sub>2</sub></i> | 177 | 189 | 868  | 183 | 1417 | 30.47 | 2.81 | 2.94 |
| <i>hcr1 BC<sub>1</sub> F<sub>2</sub></i> | 321 | 325 | 1524 | 344 | 2514 | 30.28 | 2.76 | 2.78 |
| <i>hcr1 BC<sub>1</sub> F<sub>2</sub></i> | 306 | 303 | 1468 | 295 | 2372 | 30.25 | 2.97 | 2.95 |
| <i>hcr1 BC<sub>1</sub> F<sub>2</sub></i> | 217 | 246 | 1135 | 243 | 1841 | 29.5  | 2.76 | 3    |
| <i>hcr1 BC<sub>1</sub> F<sub>2</sub></i> | 154 | 172 | 822  | 166 | 1314 | 29.02 | 2.89 | 3.11 |
| <i>hcr1 BC<sub>1</sub> F<sub>2</sub></i> | 274 | 268 | 1338 | 320 | 2200 | 28.78 | 2.74 | 2.7  |
| <i>hcr1 BC<sub>1</sub> F<sub>2</sub></i> | 276 | 296 | 1429 | 322 | 2323 | 28.76 | 2.76 | 2.88 |
| <i>hcr1 BC<sub>1</sub> F<sub>2</sub></i> | 311 | 303 | 1511 | 324 | 2449 | 29.39 | 2.91 | 2.86 |
| <i>hcr1 BC<sub>1</sub> F<sub>2</sub></i> | 203 | 207 | 1007 | 220 | 1637 | 29.35 | 2.83 | 2.87 |
| <i>hcr1 BC<sub>1</sub> F<sub>2</sub></i> | 278 | 298 | 1445 | 309 | 2330 | 28.9  | 2.84 | 2.97 |
| <i>hcr1 BC<sub>1</sub> F<sub>2</sub></i> | 133 | 119 | 648  | 124 | 1024 | 28.74 | 3.21 | 2.98 |

**Supplementary Table 4. High frequency EMS mutations identified from sequencing high 420 recombination *hcr1* BC<sub>1</sub>F<sub>2</sub> plants.** EMS mutations were analyzed using SHORE<sup>5,6</sup>. Sequencing quality score (Qual score) measure the probability that a base is called incorrectly and is defined by the equation:  $Q = -10\log_{10}(P)$ , where P is the estimated probability of the base call being incorrect. A Qual score of 40 indicates an error rate of 1 in 10,000, with a corresponding call accuracy of 99.99%. Mutation (Mut) allele indicates EMS-driven base substitutions, compared to reference (Ref) alleles. The support column shows read depth of sequencing at the position in chromosome (Chr). Frequency (Freq) represents the ratio of mutation alleles to reference allele reads.

| Chr | Position | Ref allele | Mut allele | Support | Freq | Qual score | Gene ID     | Type of Change | Ref amino acid | Mutation-induced amino acid |
|-----|----------|------------|------------|---------|------|------------|-------------|----------------|----------------|-----------------------------|
| 1   | 14592362 | C          | T          | 68      | 0.38 | 40         |             |                |                |                             |
| 1   | 16026725 | G          | A          | 32      | 0.39 | 40         |             |                |                |                             |
| 1   | 8849288  | C          | T          | 34      | 0.41 | 40         |             |                |                |                             |
| 1   | 15931420 | G          | A          | 37      | 0.41 | 40         | AT1G42470.1 | Nonsyn         | A              | T                           |
| 1   | 20697206 | C          | T          | 35      | 0.41 | 40         |             |                |                |                             |
| 1   | 11371412 | C          | T          | 14      | 0.42 | 40         | AT1G31750.1 |                |                |                             |
| 1   | 3493292  | G          | A          | 62      | 0.46 | 40         | AT1G10580.1 | Nonsyn         | P              | L                           |
| 1   | 20820201 | G          | A          | 19      | 0.47 | 40         |             |                |                |                             |
| 1   | 24478713 | C          | T          | 52      | 0.48 | 40         | AT1G65810.1 |                |                |                             |
| 1   | 24478713 | C          | T          | 52      | 0.48 | 40         | AT1G65810.2 |                |                |                             |
| 1   | 12255550 | C          | T          | 41      | 0.49 | 40         |             |                |                |                             |
| 1   | 21529618 | C          | T          | 23      | 0.56 | 40         |             |                |                |                             |
| 1   | 12592042 | C          | T          | 42      | 0.68 | 40         | AT1G34440.1 | Syn            | Q              | Q                           |
| 2   | 17189098 | C          | T          | 21      | 0.36 | 40         |             |                |                |                             |
| 2   | 2680417  | G          | A          | 42      | 0.38 | 40         |             |                |                |                             |
| 2   | 2561293  | C          | T          | 75      | 0.45 | 40         |             |                |                |                             |
| 2   | 6851201  | C          | T          | 52      | 0.5  | 40         | AT2G15730.1 | Syn            | N              | N                           |
| 2   | 9351668  | C          | T          | 48      | 0.5  | 40         | AT2G21940.1 |                |                |                             |
| 2   | 9351668  | C          | T          | 48      | 0.5  | 40         | AT2G21940.2 |                |                |                             |
| 2   | 9351668  | C          | T          | 48      | 0.5  | 40         | AT2G21940.3 |                |                |                             |
| 2   | 9351668  | C          | T          | 48      | 0.5  | 40         | AT2G21940.4 |                |                |                             |
| 2   | 9351668  | C          | T          | 48      | 0.5  | 40         | AT2G21940.5 |                |                |                             |
| 2   | 2646255  | C          | T          | 63      | 0.53 | 40         |             |                |                |                             |
| 2   | 4489446  | C          | T          | 70      | 0.55 | 40         |             |                |                |                             |
| 3   | 4426808  | G          | A          | 65      | 0.45 | 40         | AT3G13560.1 | Nonsyn         | A              | V                           |
| 3   | 4426808  | G          | A          | 65      | 0.45 | 40         | AT3G13560.2 | Nonsyn         | A              | V                           |
| 3   | 4426808  | G          | A          | 65      | 0.45 | 40         | AT3G13560.3 | Nonsyn         | A              | V                           |
| 3   | 13801565 | C          | T          | 14      | 0.47 | 40         |             |                |                |                             |
| 3   | 8901306  | G          | A          | 20      | 0.49 | 40         | AT3G24480.1 | Nonsyn         | P              | S                           |
| 3   | 2968465  | C          | T          | 62      | 0.5  | 40         | AT3G09670.1 | Nonsyn         | T              | I                           |
| 3   | 2968465  | C          | T          | 62      | 0.5  | 40         | AT3G09670.2 | Nonsyn         | T              | I                           |
| 3   | 8598244  | G          | A          | 37      | 0.51 | 40         |             |                |                |                             |
| 3   | 12217216 | C          | T          | 72      | 0.51 | 40         |             |                |                |                             |
| 3   | 2350190  | G          | A          | 28      | 0.58 | 40         |             |                |                |                             |
| 4   | 15277823 | C          | T          | 56      | 0.86 | 40         |             |                |                |                             |

|   |          |   |   |     |      |    |                           |        |   |   |
|---|----------|---|---|-----|------|----|---------------------------|--------|---|---|
| 4 | 15484080 | G | A | 101 | 0.89 | 40 | AT4G32010.1               |        |   |   |
| 4 | 12032472 | C | T | 88  | 0.96 | 40 | AT4G22960.1               |        |   |   |
| 4 | 13471378 | C | T | 119 | 0.98 | 40 | AT4G26720.1/PPX1,<br>HCR1 |        |   |   |
| 5 | 17848364 | C | T | 28  | 0.36 | 40 | AT5G44310.1               | Syn    | K | K |
| 5 | 17848364 | C | T | 28  | 0.36 | 40 | AT5G44310.2               | Syn    | K | K |
| 5 | 4046904  | C | T | 58  | 0.42 | 40 | AT5G12470.1               | Syn    | A | A |
| 5 | 10075739 | G | A | 40  | 0.43 | 40 |                           |        |   |   |
| 5 | 10336128 | G | A | 56  | 0.43 | 40 |                           |        |   |   |
| 5 | 10994278 | C | T | 34  | 0.43 | 40 |                           |        |   |   |
| 5 | 12769404 | G | A | 57  | 0.43 | 40 |                           |        |   |   |
| 5 | 13313698 | C | T | 29  | 0.43 | 40 |                           |        |   |   |
| 5 | 22166578 | C | T | 30  | 0.43 | 40 |                           |        |   |   |
| 5 | 5153800  | G | A | 35  | 0.45 | 40 | AT5G15800.1               |        |   |   |
| 5 | 5153800  | G | A | 35  | 0.45 | 40 | AT5G15800.2               |        |   |   |
| 5 | 17848369 | C | T | 33  | 0.45 | 40 | AT5G44310.1               | Nonsyn | V | M |
| 5 | 17848369 | C | T | 33  | 0.45 | 40 | AT5G44310.2               | Nonsyn | V | M |
| 5 | 10214637 | G | A | 36  | 0.47 | 40 |                           |        |   |   |
| 5 | 18666017 | G | A | 27  | 0.47 | 40 |                           |        |   |   |
| 5 | 10459490 | G | A | 10  | 0.48 | 40 |                           |        |   |   |
| 5 | 13664914 | C | T | 62  | 0.48 | 40 | AT5G35430.1               | Nonsyn | R | W |
| 5 | 21318563 | G | A | 135 | 0.48 | 40 | AT5G52530.1               | Nonsyn | V | M |
| 5 | 21318563 | G | A | 135 | 0.48 | 40 | AT5G52530.2               | Nonsyn | V | M |
| 5 | 21318563 | G | A | 135 | 0.48 | 40 | AT5G52530.3               | Nonsyn | V | M |
| 5 | 4004534  | G | A | 97  | 0.51 | 40 | AT5G12370.1               |        |   |   |
| 5 | 4004534  | G | A | 97  | 0.51 | 40 | AT5G12370.2               |        |   |   |
| 5 | 4004534  | G | A | 97  | 0.51 | 40 | AT5G12370.3               |        |   |   |
| 5 | 25962334 | C | T | 73  | 0.51 | 40 | AT5G64980.1               | Nonsyn | G | E |
| 5 | 13299008 | C | T | 44  | 0.55 | 40 |                           |        |   |   |
| 5 | 1999606  | G | A | 67  | 0.56 | 40 | AT5G06540.1               | Nonsyn | L | F |
| 5 | 1999606  | G | A | 67  | 0.56 | 40 | AT5G06540.1               | Nonsyn | L | F |



**Supplementary Table 5. 420 crossover frequency in wild type and *hcr1-1* transformed with *PPX1* transgenes or empty vector.** 420 crossover frequency was measured by analyzing counts of fluorescence and non-fluorescent seeds from 420/++ hemizygote plants, using CellProfiler<sup>1,2</sup>. In the seeds from self-fertilized 420/++ plants, CellProfiler determines the numbers of green-alone fluorescent seeds ( $N_{\text{Green}}$ ), red-alone fluorescent seeds ( $N_{\text{Red}}$ ) and total seeds ( $N_{\text{Total}}$ ). Crossover frequency (cM) is calculated using the formula:  $\text{cM} = 100 \times (1 - [1 - 2(N_{\text{Green}} + N_{\text{Red}})/N_{\text{Total}}]^{1/2})^{3,4}$ . To test for significant differences between genotypes, *P* values were calculated using one-sided Welch's t-tests.

| Genotype      | Transgene | Green | Red | Both | None | Total | cM    | G/nG | R/nR | Mean  | SD   | <i>P</i> value                                                                  |
|---------------|-----------|-------|-----|------|------|-------|-------|------|------|-------|------|---------------------------------------------------------------------------------|
| Wild type     | None      | 215   | 174 | 1427 | 379  | 2195  | 19.65 | 2.97 | 2.7  | 19.12 | 0.75 |                                                                                 |
| Wild type     | None      | 151   | 147 | 1168 | 308  | 1774  | 18.51 | 2.9  | 2.86 |       |      |                                                                                 |
| Wild type     | None      | 180   | 182 | 1453 | 350  | 2165  | 18.42 | 3.07 | 3.08 |       |      |                                                                                 |
| Wild type     | None      | 199   | 191 | 1503 | 357  | 2250  | 19.17 | 3.11 | 3.05 |       |      |                                                                                 |
| Wild type     | None      | 170   | 216 | 1560 | 362  | 2308  | 18.42 | 2.99 | 3.34 |       |      |                                                                                 |
| Wild type     | None      | 200   | 185 | 1404 | 324  | 2113  | 20.28 | 3.15 | 3.03 |       |      |                                                                                 |
| Wild type     | None      | 196   | 180 | 1388 | 350  | 2114  | 19.73 | 2.99 | 2.87 |       |      |                                                                                 |
| Wild type     | None      | 195   | 159 | 1328 | 310  | 1992  | 19.71 | 3.25 | 2.94 |       |      |                                                                                 |
| Wild type     | None      | 177   | 197 | 1508 | 377  | 2259  | 18.21 | 2.94 | 3.08 |       |      |                                                                                 |
| <i>hcr1-1</i> | None      | 175   | 145 | 922  | 183  | 1425  | 25.78 | 3.34 | 2.98 |       |      |                                                                                 |
| <i>hcr1-1</i> | None      | 188   | 202 | 1158 | 269  | 1817  | 24.45 | 2.86 | 2.98 |       |      |                                                                                 |
| <i>hcr1-1</i> | None      | 190   | 201 | 1204 | 237  | 1832  | 24.29 | 3.18 | 3.29 |       |      |                                                                                 |
| <i>hcr1-1</i> | None      | 144   | 136 | 778  | 145  | 1203  | 26.89 | 3.28 | 3.16 |       |      |                                                                                 |
| <i>hcr1-1</i> | None      | 236   | 234 | 1462 | 267  | 2199  | 24.33 | 3.39 | 3.37 |       |      |                                                                                 |
| <i>hcr1-1</i> | None      | 232   | 240 | 1419 | 305  | 2196  | 24.49 | 3.03 | 3.09 |       |      |                                                                                 |
| <i>hcr1-1</i> | None      | 286   | 238 | 1443 | 306  | 2273  | 26.59 | 3.18 | 2.84 |       |      |                                                                                 |
| <i>hcr1-1</i> | None      | 252   | 246 | 1397 | 282  | 2177  | 26.35 | 3.12 | 3.08 |       |      |                                                                                 |
| <i>hcr1-1</i> | None      | 208   | 239 | 1328 | 333  | 2108  | 24.11 | 2.69 | 2.9  |       |      |                                                                                 |
| <i>hcr1-1</i> | None      | 253   | 238 | 1394 | 306  | 2191  | 25.72 | 3.03 | 2.92 |       |      |                                                                                 |
| <i>hcr1-1</i> | None      | 286   | 238 | 1443 | 306  | 2273  | 26.59 | 3.18 | 2.84 | 19.59 | 1.33 | 0.141<br><br>Between wild type and <i>hcr1-1</i> +Empty = 3.17×10 <sup>-9</sup> |
| Wild type     | Empty     | 131   | 107 | 859  | 202  | 1299  | 20.4  | 3.2  | 2.9  |       |      |                                                                                 |
| Wild type     | Empty     | 130   | 102 | 881  | 222  | 1335  | 19.23 | 3.12 | 2.79 |       |      |                                                                                 |
| Wild type     | Empty     | 78    | 66  | 476  | 119  | 739   | 21.88 | 2.99 | 2.75 |       |      |                                                                                 |
| Wild type     | Empty     | 127   | 158 | 1120 | 296  | 1701  | 18.46 | 2.75 | 3.02 |       |      |                                                                                 |
| Wild type     | Empty     | 167   | 118 | 990  | 236  | 1511  | 21.08 | 3.27 | 2.75 |       |      |                                                                                 |
| Wild type     | Empty     | 146   | 110 | 986  | 253  | 1495  | 18.91 | 3.12 | 2.75 |       |      |                                                                                 |
| Wild type     | Empty     | 53    | 62  | 457  | 101  | 673   | 18.87 | 3.13 | 3.37 |       |      |                                                                                 |
| Wild type     | Empty     | 88    | 94  | 731  | 173  | 1086  | 18.46 | 3.07 | 3.16 |       |      |                                                                                 |
| Wild type     | Empty     | 108   | 129 | 921  | 221  | 1379  | 18.99 | 2.94 | 3.19 |       |      |                                                                                 |
| Wild type     | Empty     | 227   | 254 | 1655 | 462  | 2598  | 20.65 | 2.63 | 2.77 |       |      |                                                                                 |
| Wild type     | Empty     | 187   | 174 | 1549 | 393  | 2303  | 17.14 | 3.06 | 2.97 |       |      |                                                                                 |
| Wild type     | Empty     | 267   | 200 | 1564 | 396  | 2427  | 21.57 | 3.07 | 2.66 |       |      |                                                                                 |
| Wild type     | Empty     | 204   | 170 | 1440 | 413  | 2227  | 18.51 | 2.82 | 2.61 |       |      |                                                                                 |
| Wild type     | Empty     | 250   | 221 | 1688 | 439  | 2598  | 20.16 | 2.94 | 2.77 |       |      |                                                                                 |
| Wild type     | Empty     | 229   | 223 | 1685 | 426  | 2563  | 19.55 | 2.95 | 2.91 |       |      |                                                                                 |
| <i>hcr1-1</i> | Empty     | 213   | 188 | 1131 | 225  | 1757  | 26.27 | 3.25 | 3.01 | 25.01 | 1.50 | 3.45×10 <sup>-9</sup>                                                           |
| <i>hcr1-1</i> | Empty     | 173   | 195 | 1171 | 245  | 1784  | 23.36 | 3.05 | 3.27 |       |      |                                                                                 |

|               |             |     |     |      |     |      |       |      |      |       |      |                                                                                               |
|---------------|-------------|-----|-----|------|-----|------|-------|------|------|-------|------|-----------------------------------------------------------------------------------------------|
| <i>hcr1-1</i> | Empty       | 142 | 135 | 699  | 180 | 1156 | 27.84 | 2.67 | 2.59 |       |      | Between<br><i>hcr1-1</i> +Empty<br>and <i>hcr1-1</i> + <i>PPX1</i> =<br>$1.94 \times 10^{-8}$ |
| <i>hcr1-1</i> | Empty       | 213 | 218 | 1183 | 234 | 1848 | 26.96 | 3.09 | 3.13 |       |      |                                                                                               |
| <i>hcr1-1</i> | Empty       | 141 | 92  | 678  | 157 | 1068 | 24.92 | 3.29 | 2.58 |       |      |                                                                                               |
| <i>hcr1-1</i> | Empty       | 204 | 164 | 1123 | 226 | 1717 | 24.41 | 3.4  | 2.99 |       |      |                                                                                               |
| <i>hcr1-1</i> | Empty       | 175 | 187 | 1143 | 259 | 1764 | 23.22 | 2.96 | 3.06 |       |      |                                                                                               |
| <i>hcr1-1</i> | Empty       | 162 | 142 | 963  | 200 | 1467 | 23.48 | 3.29 | 3.05 |       |      |                                                                                               |
| <i>hcr1-1</i> | Empty       | 72  | 80  | 461  | 93  | 706  | 24.54 | 3.08 | 3.28 |       |      |                                                                                               |
| <i>hcr1-1</i> | Empty       | 157 | 187 | 1002 | 237 | 1583 | 24.81 | 2.73 | 3.02 |       |      |                                                                                               |
| <i>hcr1-1</i> | Empty       | 169 | 168 | 949  | 239 | 1525 | 25.3  | 2.75 | 2.74 |       |      |                                                                                               |
| <i>hcr1-1</i> | <i>PPX1</i> | 157 | 185 | 1178 | 284 | 1804 | 21.21 | 2.85 | 3.09 | 19.29 | 0.98 | 0.357                                                                                         |
| <i>hcr1-1</i> | <i>PPX1</i> | 159 | 181 | 1329 | 327 | 1996 | 18.8  | 2.93 | 3.11 |       |      |                                                                                               |
| <i>hcr1-1</i> | <i>PPX1</i> | 171 | 181 | 1318 | 295 | 1965 | 19.89 | 3.13 | 3.22 |       |      |                                                                                               |
| <i>hcr1-1</i> | <i>PPX1</i> | 172 | 230 | 1612 | 415 | 2429 | 18.21 | 2.77 | 3.14 |       |      |                                                                                               |
| <i>hcr1-1</i> | <i>PPX1</i> | 210 | 205 | 1567 | 410 | 2392 | 19.19 | 2.89 | 2.86 |       |      |                                                                                               |
| <i>hcr1-1</i> | <i>PPX1</i> | 243 | 205 | 1715 | 462 | 2625 | 18.84 | 2.94 | 2.72 |       |      |                                                                                               |
| <i>hcr1-1</i> | <i>PPX1</i> | 142 | 137 | 1064 | 287 | 1630 | 18.9  | 2.84 | 2.8  |       |      |                                                                                               |

**Supplementary Table 6. 420 crossover frequency in wild type (Col), *hcr1-1*, *hcr1-2*, and *hcr1-1/hcr1-2* hybrid plants.** 420 crossover frequency was measured by analyzing counts of fluorescence and non-fluorescent seeds from 420/++ hemizygote plants, using CellProfiler<sup>1,2</sup>. In the seeds from self-fertilized 420/++ plants, CellProfiler determines the numbers of green-alone fluorescent seeds ( $N_{\text{Green}}$ ), red-alone fluorescent seeds ( $N_{\text{Red}}$ ) and total seeds ( $N_{\text{Total}}$ ). Crossover frequency (cM) is calculated using the formula:  $\text{cM} = 100 \times (1 - [1 - 2(N_{\text{Green}} + N_{\text{Red}})/N_{\text{Total}}]^{1/2})^{3,4}$ . To test for significant differences between wild type and genotypes, *P* values were calculated using one-sided Welch's t-tests.

| Genotype      | Green | Red | Both | None | Total | cM    | G/nG | R/nR | Mean  | SD   | <i>P</i> value         |
|---------------|-------|-----|------|------|-------|-------|------|------|-------|------|------------------------|
| Wild type     | 175   | 173 | 1314 | 295  | 1957  | 19.73 | 3.18 | 3.16 | 19.87 | 1.45 |                        |
| Wild type     | 158   | 152 | 1208 | 310  | 1828  | 18.71 | 2.96 | 2.91 |       |      |                        |
| Wild type     | 178   | 147 | 1230 | 317  | 1872  | 19.21 | 3.03 | 2.78 |       |      |                        |
| Wild type     | 180   | 169 | 1323 | 317  | 1989  | 19.44 | 3.09 | 3    |       |      |                        |
| Wild type     | 181   | 166 | 1392 | 311  | 2050  | 18.67 | 3.3  | 3.17 |       |      |                        |
| Wild type     | 154   | 167 | 1264 | 342  | 1927  | 18.34 | 2.79 | 2.89 |       |      |                        |
| Wild type     | 200   | 160 | 1406 | 334  | 2100  | 18.94 | 3.25 | 2.93 |       |      |                        |
| Wild type     | 148   | 169 | 1258 | 274  | 1849  | 18.94 | 3.17 | 3.38 |       |      |                        |
| Wild type     | 222   | 175 | 1196 | 333  | 1926  | 23.34 | 2.79 | 2.47 |       |      |                        |
| Wild type     | 154   | 151 | 1137 | 293  | 1735  | 19.48 | 2.91 | 2.88 |       |      |                        |
| Wild type     | 162   | 186 | 1205 | 284  | 1837  | 21.19 | 2.91 | 3.12 |       |      |                        |
| Wild type     | 162   | 156 | 1168 | 294  | 1780  | 19.83 | 2.96 | 2.9  |       |      |                        |
| Wild type     | 160   | 159 | 1048 | 259  | 1626  | 22.05 | 2.89 | 2.88 |       |      |                        |
| Wild type     | 198   | 154 | 1230 | 345  | 1927  | 20.33 | 2.86 | 2.55 |       |      |                        |
| Wild type     | 191   | 151 | 1107 | 296  | 1745  | 22.02 | 2.9  | 2.58 |       |      |                        |
| Wild type     | 127   | 106 | 972  | 231  | 1436  | 17.81 | 3.26 | 3.01 |       |      |                        |
| Wild type     | 172   | 179 | 1379 | 325  | 2055  | 18.86 | 3.08 | 3.13 |       |      |                        |
| Wild type     | 184   | 166 | 1282 | 292  | 1924  | 20.24 | 3.2  | 3.04 |       |      |                        |
| Wild type     | 167   | 159 | 1265 | 328  | 1919  | 18.74 | 2.94 | 2.88 |       |      |                        |
| Wild type     | 188   | 196 | 1304 | 317  | 2005  | 21.45 | 2.91 | 2.97 |       |      |                        |
| <i>hcr1-1</i> | 145   | 129 | 930  | 166  | 1370  | 22.54 | 3.64 | 3.41 | 25.01 | 2.15 | $1.62 \times 10^{-10}$ |
| <i>hcr1-1</i> | 169   | 183 | 965  | 186  | 1503  | 27.09 | 3.07 | 3.23 |       |      |                        |
| <i>hcr1-1</i> | 184   | 175 | 1108 | 243  | 1710  | 23.83 | 3.09 | 3    |       |      |                        |
| <i>hcr1-1</i> | 195   | 176 | 1090 | 232  | 1693  | 25.05 | 3.15 | 2.96 |       |      |                        |
| <i>hcr1-1</i> | 204   | 155 | 1042 | 205  | 1606  | 25.64 | 3.46 | 2.93 |       |      |                        |
| <i>hcr1-1</i> | 155   | 176 | 1118 | 228  | 1677  | 22.2  | 3.15 | 3.38 |       |      |                        |
| <i>hcr1-1</i> | 150   | 143 | 1001 | 218  | 1512  | 21.74 | 3.19 | 3.11 |       |      |                        |
| <i>hcr1-1</i> | 185   | 198 | 1216 | 236  | 1835  | 23.67 | 3.23 | 3.36 |       |      |                        |
| <i>hcr1-1</i> | 191   | 153 | 996  | 195  | 1535  | 25.72 | 3.41 | 2.98 |       |      |                        |
| <i>hcr1-1</i> | 210   | 209 | 1102 | 216  | 1737  | 28.06 | 3.09 | 3.08 |       |      |                        |
| <i>hcr1-1</i> | 155   | 117 | 724  | 194  | 1190  | 26.32 | 2.83 | 2.41 |       |      |                        |
| <i>hcr1-1</i> | 207   | 176 | 1110 | 226  | 1719  | 25.54 | 3.28 | 2.97 |       |      |                        |
| <i>hcr1-1</i> | 201   | 157 | 922  | 190  | 1470  | 28.38 | 3.24 | 2.76 |       |      |                        |
| <i>hcr1-1</i> | 179   | 184 | 1156 | 246  | 1765  | 23.28 | 3.1  | 3.15 |       |      |                        |
| <i>hcr1-1</i> | 144   | 171 | 1146 | 239  | 1700  | 20.66 | 3.15 | 3.44 |       |      |                        |
| <i>hcr1-1</i> | 180   | 218 | 1179 | 286  | 1863  | 24.32 | 2.7  | 3    |       |      |                        |
| <i>hcr1-1</i> | 165   | 141 | 881  | 164  | 1351  | 26.04 | 3.43 | 3.11 |       |      |                        |

|                      |     |     |      |     |      |       |      |      |       |      |                                                               |
|----------------------|-----|-----|------|-----|------|-------|------|------|-------|------|---------------------------------------------------------------|
| <i>hcr1-1</i>        | 143 | 132 | 774  | 128 | 1177 | 27.01 | 3.53 | 3.34 |       |      |                                                               |
| <i>hcr1-1</i>        | 172 | 182 | 981  | 208 | 1543 | 26.44 | 2.96 | 3.06 |       |      |                                                               |
| <i>hcr1-1</i>        | 133 | 157 | 801  | 162 | 1253 | 26.71 | 2.93 | 3.25 |       |      |                                                               |
| <i>hcr1-2</i>        | 180 | 147 | 1042 | 247 | 1616 | 22.84 | 3.1  | 2.78 |       |      |                                                               |
| <i>hcr1-2</i>        | 115 | 124 | 816  | 205 | 1260 | 21.22 | 2.83 | 2.94 |       |      |                                                               |
| <i>hcr1-2</i>        | 183 | 192 | 1127 | 265 | 1767 | 24.13 | 2.87 | 2.94 |       |      |                                                               |
| <i>hcr1-2</i>        | 173 | 138 | 1050 | 247 | 1608 | 21.69 | 3.18 | 2.83 |       |      |                                                               |
| <i>hcr1-2</i>        | 111 | 150 | 843  | 195 | 1299 | 22.66 | 2.77 | 3.25 |       |      |                                                               |
| <i>hcr1-2</i>        | 186 | 167 | 1107 | 238 | 1698 | 23.57 | 3.19 | 3    |       |      |                                                               |
| <i>hcr1-2</i>        | 139 | 144 | 882  | 206 | 1371 | 23.37 | 2.92 | 2.97 |       |      |                                                               |
| <i>hcr1-2</i>        | 148 | 164 | 928  | 219 | 1459 | 24.35 | 2.81 | 2.98 |       |      |                                                               |
| <i>hcr1-2</i>        | 175 | 170 | 1055 | 274 | 1674 | 23.33 | 2.77 | 2.73 |       |      |                                                               |
| <i>hcr1-2</i>        | 166 | 176 | 1053 | 208 | 1603 | 24.28 | 3.17 | 3.29 | 22.98 | 1.5  | $5.43 \times 10^{-8}$                                         |
| <i>hcr1-2</i>        | 75  | 78  | 500  | 121 | 774  | 22.24 | 2.89 | 2.95 |       |      |                                                               |
| <i>hcr1-2</i>        | 204 | 167 | 1093 | 267 | 1731 | 24.41 | 2.99 | 2.68 |       |      |                                                               |
| <i>hcr1-2</i>        | 126 | 82  | 729  | 160 | 1097 | 21.21 | 3.53 | 2.84 |       |      |                                                               |
| <i>hcr1-2</i>        | 168 | 156 | 1111 | 252 | 1687 | 21.52 | 3.13 | 3.02 |       |      |                                                               |
| <i>hcr1-2</i>        | 171 | 212 | 1035 | 271 | 1689 | 26.08 | 2.5  | 2.82 |       |      |                                                               |
| <i>hcr1-2</i>        | 184 | 140 | 1155 | 273 | 1752 | 20.62 | 3.24 | 2.83 |       |      |                                                               |
| <i>hcr1-2</i>        | 206 | 208 | 1209 | 254 | 1877 | 25.24 | 3.06 | 3.08 |       |      |                                                               |
| <i>hcr1-2</i>        | 135 | 134 | 915  | 205 | 1389 | 21.73 | 3.1  | 3.09 |       |      |                                                               |
| <i>hcr1-2</i>        | 191 | 166 | 1187 | 265 | 1809 | 22.2  | 3.2  | 2.97 |       |      |                                                               |
| <i>hcr1-1/hcr1-2</i> | 227 | 195 | 1153 | 256 | 1831 | 26.58 | 3.06 | 2.79 |       |      |                                                               |
| <i>hcr1-1/hcr1-2</i> | 256 | 172 | 1175 | 256 | 1859 | 26.55 | 3.34 | 2.63 |       |      |                                                               |
| <i>hcr1-1/hcr1-2</i> | 194 | 171 | 1139 | 273 | 1777 | 23.24 | 3    | 2.81 |       |      |                                                               |
| <i>hcr1-1/hcr1-2</i> | 225 | 221 | 1192 | 316 | 1954 | 26.28 | 2.64 | 2.61 |       |      |                                                               |
| <i>hcr1-1/hcr1-2</i> | 163 | 192 | 961  | 246 | 1562 | 26.15 | 2.57 | 2.82 |       |      |                                                               |
| <i>hcr1-1/hcr1-2</i> | 204 | 185 | 1174 | 221 | 1784 | 24.91 | 3.39 | 3.2  |       |      |                                                               |
| <i>hcr1-1/hcr1-2</i> | 203 | 164 | 1191 | 250 | 1808 | 22.93 | 3.37 | 2.99 |       |      |                                                               |
| <i>hcr1-1/hcr1-2</i> | 159 | 148 | 1040 | 200 | 1547 | 22.34 | 3.45 | 3.31 |       |      |                                                               |
| <i>hcr1-1/hcr1-2</i> | 232 | 155 | 1158 | 243 | 1788 | 24.69 | 3.49 | 2.76 |       |      | $4.91 \times 10^{-10}$                                        |
| <i>hcr1-1/hcr1-2</i> | 175 | 160 | 1181 | 287 | 1803 | 20.73 | 3.03 | 2.9  | 24.17 | 1.71 | Between <i>hcr1-1</i> and<br><i>hcr1-1/hcr1-2</i> =<br>0.0591 |
| <i>hcr1-1/hcr1-2</i> | 188 | 149 | 1177 | 239 | 1753 | 21.55 | 3.52 | 3.11 |       |      |                                                               |
| <i>hcr1-1/hcr1-2</i> | 141 | 192 | 995  | 237 | 1565 | 24.21 | 2.65 | 3.14 |       |      |                                                               |
| <i>hcr1-1/hcr1-2</i> | 187 | 174 | 1038 | 218 | 1617 | 25.6  | 3.13 | 2.99 |       |      |                                                               |
| <i>hcr1-1/hcr1-2</i> | 126 | 109 | 738  | 182 | 1155 | 22.99 | 2.97 | 2.75 |       |      |                                                               |
| <i>hcr1-1/hcr1-2</i> | 177 | 212 | 1154 | 262 | 1805 | 24.57 | 2.81 | 3.11 |       |      |                                                               |
| <i>hcr1-1/hcr1-2</i> | 203 | 185 | 1314 | 273 | 1975 | 22.08 | 3.31 | 3.15 |       |      |                                                               |
| <i>hcr1-1/hcr1-2</i> | 216 | 174 | 1188 | 234 | 1812 | 24.53 | 3.44 | 3.03 |       |      |                                                               |
| <i>hcr1-1/hcr1-2</i> | 185 | 162 | 1070 | 269 | 1686 | 23.29 | 2.91 | 2.71 |       |      |                                                               |
| <i>hcr1-1/hcr1-2</i> | 229 | 232 | 1332 | 298 | 2091 | 25.23 | 2.95 | 2.97 |       |      |                                                               |
| <i>hcr1-1/hcr1-2</i> | 228 | 202 | 1241 | 300 | 1971 | 24.92 | 2.93 | 2.73 |       |      |                                                               |

**Supplementary Table 7. 420 crossover frequency in wild type, *ppx1*, *ppx2* and *pp4r2* mutants.** 420 crossover frequency was measured by analyzing counts of fluorescence and non-fluorescent seeds from 420/++ hemizygote plants, using CellProfiler<sup>1,2</sup>. In the seeds from self-fertilized 420/++ plants, CellProfiler determines the numbers of green-alone fluorescent seeds ( $N_{\text{Green}}$ ), red-alone fluorescent seeds ( $N_{\text{Red}}$ ) and total seeds ( $N_{\text{Total}}$ ). Crossover frequency (cM) is calculated using the formula:  $\text{cM} = 100 \times (1 - [1 - 2(N_{\text{Green}} + N_{\text{Red}})/N_{\text{Total}}]^{1/2})^{3,4}$ . To test for significant differences between genotypes, *P* values were calculated using one-sided Welch's t-tests.

| Genotype             | Green | Red | Both | None | Total | cM    | G/nG | R/nR | Mean  | SD   | <i>P</i> value        |
|----------------------|-------|-----|------|------|-------|-------|------|------|-------|------|-----------------------|
| Wild type            | 240   | 201 | 1544 | 382  | 2367  | 20.79 | 3.06 | 2.81 | 18.58 | 1.82 |                       |
| Wild type            | 199   | 193 | 1703 | 443  | 2538  | 16.87 | 2.99 | 2.95 |       |      |                       |
| Wild type            | 252   | 199 | 1795 | 521  | 2767  | 17.9  | 2.84 | 2.58 |       |      |                       |
| Wild type            | 241   | 233 | 1707 | 411  | 2592  | 20.36 | 3.02 | 2.98 |       |      |                       |
| Wild type            | 218   | 205 | 1723 | 452  | 2598  | 17.88 | 2.95 | 2.88 |       |      |                       |
| Wild type            | 194   | 119 | 1337 | 332  | 1982  | 17.29 | 3.39 | 2.77 |       |      |                       |
| Wild type            | 195   | 203 | 1854 | 432  | 2684  | 16.13 | 3.23 | 3.28 |       |      |                       |
| Wild type            | 172   | 107 | 955  | 237  | 1471  | 21.22 | 3.28 | 2.6  |       |      |                       |
| Wild type            | 238   | 196 | 1683 | 433  | 2550  | 18.78 | 3.05 | 2.8  |       |      |                       |
| <i>hcr1-2</i>        | 238   | 259 | 1525 | 376  | 2398  | 23.48 | 2.78 | 2.91 |       |      |                       |
| <i>hcr1-2</i>        | 312   | 258 | 1620 | 400  | 2590  | 25.18 | 2.94 | 2.64 |       |      |                       |
| <i>hcr1-2</i>        | 193   | 173 | 1203 | 285  | 1854  | 22.21 | 3.05 | 2.88 |       |      |                       |
| <i>hcr1-2</i>        | 309   | 267 | 1619 | 365  | 2560  | 25.84 | 3.05 | 2.8  |       |      |                       |
| <i>hcr1-2</i>        | 308   | 240 | 1728 | 334  | 2610  | 23.84 | 3.55 | 3.07 |       |      |                       |
| <i>hcr1-2</i>        | 263   | 228 | 1488 | 370  | 2349  | 23.71 | 2.93 | 2.71 |       |      |                       |
| <i>hcr1-2</i>        | 267   | 277 | 1643 | 374  | 2561  | 24.16 | 2.93 | 3    |       |      |                       |
| <i>hcr1-2</i>        | 276   | 179 | 1426 | 281  | 2162  | 23.9  | 3.7  | 2.88 |       |      |                       |
| <i>ppx2-1</i>        | 176   | 178 | 1399 | 308  | 2061  | 18.98 | 3.24 | 3.26 | 19.4  | 0.68 | 0.119                 |
| <i>ppx2-1</i>        | 190   | 157 | 1276 | 315  | 1938  | 19.88 | 3.11 | 2.84 |       |      |                       |
| <i>ppx2-1</i>        | 165   | 162 | 1231 | 284  | 1842  | 19.69 | 3.13 | 3.1  |       |      |                       |
| <i>ppx2-1</i>        | 148   | 159 | 1126 | 289  | 1722  | 19.79 | 2.84 | 2.94 |       |      |                       |
| <i>ppx2-1</i>        | 66    | 64  | 495  | 108  | 733   | 19.67 | 3.26 | 3.21 |       |      |                       |
| <i>ppx2-1</i>        | 136   | 132 | 1096 | 270  | 1634  | 18.03 | 3.06 | 3.02 |       |      |                       |
| <i>ppx2-1</i>        | 167   | 160 | 1225 | 281  | 1833  | 19.8  | 3.16 | 3.09 |       |      |                       |
| <i>hcr1-2 ppx2-1</i> | 229   | 226 | 1205 | 257  | 1917  | 27.52 | 2.97 | 2.94 | 26.90 | 1.38 | 1.46×10 <sup>-8</sup> |
| <i>hcr1-2 ppx2-1</i> | 289   | 249 | 1368 | 320  | 2226  | 28.12 | 2.91 | 2.66 |       |      |                       |
| <i>hcr1-2 ppx2-1</i> | 310   | 265 | 1613 | 381  | 2569  | 25.68 | 2.98 | 2.72 |       |      |                       |
| <i>hcr1-2 ppx2-1</i> | 205   | 199 | 1191 | 241  | 1836  | 25.17 | 3.17 | 3.12 |       |      |                       |
| <i>hcr1-2 ppx2-1</i> | 207   | 258 | 1143 | 230  | 1838  | 29.71 | 2.77 | 3.21 |       |      |                       |
| <i>hcr1-2 ppx2-1</i> | 192   | 206 | 1169 | 259  | 1826  | 24.90 | 2.93 | 3.05 |       |      |                       |
| <i>hcr1-2 ppx2-1</i> | 197   | 182 | 1012 | 217  | 1608  | 27.29 | 3.03 | 2.88 |       |      |                       |
| <i>hcr1-2 ppx2-1</i> | 197   | 213 | 1137 | 233  | 1780  | 26.56 | 2.99 | 3.14 |       |      |                       |
| <i>hcr1-2 ppx2-1</i> | 210   | 198 | 1075 | 227  | 1710  | 27.69 | 3.02 | 2.91 |       |      |                       |
| <i>hcr1-2 ppx2-1</i> | 227   | 231 | 1271 | 271  | 2000  | 26.38 | 2.98 | 3.02 |       |      |                       |
| <i>hcr1-2 ppx2-1</i> | 201   | 216 | 1156 | 223  | 1796  | 26.81 | 3.09 | 3.24 |       |      |                       |
| <i>hcr1-2 ppx2-1</i> | 170   | 162 | 943  | 229  | 1504  | 25.27 | 2.85 | 2.77 |       |      |                       |
| <i>pp4r2</i>         | 162   | 152 | 969  | 204  | 1487  | 24    | 3.18 | 3.06 | 24.3  | 3.52 | 4.24×10 <sup>-5</sup> |

|              |     |     |      |     |      |       |      |      |  |  |  |
|--------------|-----|-----|------|-----|------|-------|------|------|--|--|--|
| <i>pp4r2</i> | 230 | 179 | 1372 | 318 | 2099 | 21.88 | 3.22 | 2.83 |  |  |  |
| <i>pp4r2</i> | 128 | 143 | 608  | 130 | 1009 | 31.97 | 2.7  | 2.91 |  |  |  |
| <i>pp4r2</i> | 219 | 198 | 1252 | 293 | 1962 | 24.18 | 3    | 2.83 |  |  |  |
| <i>pp4r2</i> | 190 | 165 | 1055 | 227 | 1637 | 24.75 | 3.18 | 2.93 |  |  |  |
| <i>pp4r2</i> | 131 | 140 | 841  | 177 | 1289 | 23.87 | 3.07 | 3.19 |  |  |  |
| <i>pp4r2</i> | 101 | 84  | 567  | 120 | 872  | 24.13 | 3.27 | 2.95 |  |  |  |
| <i>pp4r2</i> | 86  | 87  | 601  | 145 | 919  | 21.04 | 2.96 | 2.98 |  |  |  |
| <i>pp4r2</i> | 171 | 166 | 1063 | 207 | 1607 | 23.8  | 3.31 | 3.25 |  |  |  |
| <i>pp4r2</i> | 215 | 177 | 913  | 177 | 1482 | 31.37 | 3.19 | 2.78 |  |  |  |
| <i>pp4r2</i> | 156 | 169 | 1146 | 273 | 1744 | 20.8  | 2.95 | 3.07 |  |  |  |
| <i>pp4r2</i> | 220 | 191 | 1289 | 355 | 2055 | 22.54 | 2.76 | 2.57 |  |  |  |
| <i>pp4r2</i> | 119 | 101 | 754  | 166 | 1140 | 21.64 | 3.27 | 3    |  |  |  |

**Supplementary Table 8. 420 crossover frequency in wild type and *meiMIGS-PPX1*, *meiMIGS-PPX2* and *meiMIGS-PPX1-PPX2* T<sub>1</sub> and T<sub>2</sub> transgenic lines.** 420 crossover frequency was measured by analyzing counts of fluorescence and non-fluorescent seeds from 420/++ hemizygote plants, using CellProfiler<sup>1,2</sup>. In the seeds from self-fertilized 420/++ plants, CellProfiler determines the numbers of green-alone fluorescent seeds (N<sub>Green</sub>), red-alone fluorescent seeds (N<sub>Red</sub>) and total seeds (N<sub>Total</sub>). Crossover frequency (cM) is calculated using the formula:  $cM=100 \times (1 - [1-2(N_{Green}+N_{Red})/N_{Total}]^{1/2})^{3,4}$ . To test for significant differences between wild type and genotypes, *P* values were calculated using one-sided Welch's t-tests.

| Genotype                           | Green | Red | Both | None | Total | cM    | G/nG | R/nR | Mean  | SD   | <i>P</i> value                                                                                      |
|------------------------------------|-------|-----|------|------|-------|-------|------|------|-------|------|-----------------------------------------------------------------------------------------------------|
| Wild type                          | 193   | 188 | 1386 | 337  | 2104  | 20.14 | 3.01 | 2.97 | 18.89 | 1.09 |                                                                                                     |
| Wild type                          | 215   | 214 | 1628 | 360  | 2417  | 19.69 | 3.21 | 3.2  |       |      |                                                                                                     |
| Wild type                          | 123   | 130 | 1038 | 235  | 1526  | 18.24 | 3.18 | 3.26 |       |      |                                                                                                     |
| Wild type                          | 141   | 142 | 1179 | 278  | 1740  | 17.86 | 3.14 | 3.15 |       |      |                                                                                                     |
| Wild type                          | 189   | 182 | 1467 | 356  | 2194  | 18.65 | 3.08 | 3.03 |       |      |                                                                                                     |
| Wild type                          | 217   | 222 | 1662 | 406  | 2507  | 19.39 | 2.99 | 3.02 |       |      |                                                                                                     |
| Wild type                          | 213   | 188 | 1628 | 378  | 2407  | 18.34 | 3.25 | 3.07 |       |      |                                                                                                     |
| Wild type                          | 193   | 181 | 1626 | 378  | 2378  | 17.21 | 3.25 | 3.16 |       |      |                                                                                                     |
| Wild type                          | 214   | 211 | 1522 | 367  | 2314  | 20.46 | 3    | 2.98 |       |      |                                                                                                     |
| <i>hcr1-1</i>                      | 214   | 243 | 1472 | 286  | 2215  | 23.36 | 3.19 | 3.43 | 24.87 | 1.38 | 4.13×10 <sup>-9</sup>                                                                               |
| <i>hcr1-1</i>                      | 230   | 189 | 1173 | 261  | 1853  | 25.99 | 3.12 | 2.77 |       |      |                                                                                                     |
| <i>hcr1-1</i>                      | 189   | 167 | 1097 | 281  | 1734  | 23.23 | 2.87 | 2.69 |       |      |                                                                                                     |
| <i>hcr1-1</i>                      | 207   | 201 | 1072 | 248  | 1728  | 27.35 | 2.85 | 2.8  |       |      |                                                                                                     |
| <i>hcr1-1</i>                      | 167   | 138 | 862  | 169  | 1336  | 26.28 | 3.35 | 2.98 |       |      |                                                                                                     |
| <i>hcr1-1</i>                      | 204   | 229 | 1248 | 269  | 1950  | 25.44 | 2.92 | 3.12 |       |      |                                                                                                     |
| <i>hcr1-1</i>                      | 182   | 174 | 1095 | 242  | 1693  | 23.88 | 3.07 | 2.99 |       |      |                                                                                                     |
| <i>hcr1-1</i>                      | 178   | 177 | 1116 | 229  | 1700  | 23.69 | 3.19 | 3.18 |       |      |                                                                                                     |
| <i>hcr1-1</i>                      | 185   | 148 | 983  | 223  | 1539  | 24.68 | 3.15 | 2.77 |       |      |                                                                                                     |
| <i>hcr1-1</i>                      | 193   | 184 | 1118 | 238  | 1733  | 24.84 | 3.11 | 3.02 |       |      |                                                                                                     |
| <i>meiMIGS-PPX1</i> T <sub>1</sub> | 208   | 207 | 1103 | 214  | 1732  | 27.83 | 3.11 | 3.1  | 26.13 | 1.51 | 4.88×10 <sup>-11</sup><br>Between <i>hcr1</i><br>and <i>meiMIGS-PPX1</i> T <sub>1</sub> =<br>0.0279 |
| <i>meiMIGS-PPX1</i> T <sub>1</sub> | 183   | 128 | 878  | 159  | 1348  | 26.61 | 3.7  | 2.94 |       |      |                                                                                                     |
| <i>meiMIGS-PPX1</i> T <sub>1</sub> | 210   | 206 | 1097 | 223  | 1736  | 27.84 | 3.05 | 3.01 |       |      |                                                                                                     |
| <i>meiMIGS-PPX1</i> T <sub>1</sub> | 249   | 247 | 1335 | 285  | 2116  | 27.12 | 2.98 | 2.96 |       |      |                                                                                                     |
| <i>meiMIGS-PPX1</i> T <sub>1</sub> | 216   | 248 | 1212 | 278  | 1954  | 27.54 | 2.71 | 2.96 |       |      |                                                                                                     |
| <i>meiMIGS-PPX1</i> T <sub>1</sub> | 183   | 171 | 979  | 210  | 1543  | 26.44 | 3.05 | 2.93 |       |      |                                                                                                     |
| <i>meiMIGS-PPX1</i> T <sub>1</sub> | 240   | 274 | 1365 | 309  | 2188  | 27.19 | 2.75 | 2.99 |       |      |                                                                                                     |
| <i>meiMIGS-PPX1</i> T <sub>1</sub> | 253   | 241 | 1425 | 315  | 2234  | 25.32 | 3.02 | 2.93 |       |      |                                                                                                     |
| <i>meiMIGS-PPX1</i> T <sub>1</sub> | 161   | 154 | 915  | 192  | 1422  | 25.37 | 3.11 | 3.03 |       |      |                                                                                                     |
| <i>meiMIGS-PPX1</i> T <sub>1</sub> | 131   | 110 | 761  | 154  | 1156  | 23.64 | 3.38 | 3.06 |       |      |                                                                                                     |
| <i>meiMIGS-PPX1</i> T <sub>1</sub> | 206   | 207 | 1290 | 281  | 1984  | 23.6  | 3.07 | 3.07 |       |      |                                                                                                     |
| <i>meiMIGS-PPX1</i> T <sub>1</sub> | 245   | 281 | 1539 | 336  | 2401  | 25.04 | 2.89 | 3.13 |       |      |                                                                                                     |
| <i>meiMIGS-PPX1</i> T <sub>1</sub> | 132   | 128 | 670  | 128  | 1058  | 28.69 | 3.13 | 3.07 |       |      |                                                                                                     |
| <i>meiMIGS-PPX1</i> T <sub>1</sub> | 243   | 237 | 1439 | 315  | 2234  | 24.48 | 3.05 | 3    | 23.99 | 2.07 | 4.11×10 <sup>-5</sup><br>Between <i>hcr1</i><br>and <i>meiMIGS-PPX2</i> T <sub>1</sub> = 0.159      |
| <i>meiMIGS-PPX1</i> T <sub>1</sub> | 192   | 206 | 1190 | 264  | 1852  | 24.49 | 2.94 | 3.06 |       |      |                                                                                                     |
| <i>meiMIGS-PPX1</i> T <sub>1</sub> | 246   | 205 | 1477 | 311  | 2239  | 22.73 | 3.34 | 3.02 |       |      |                                                                                                     |
| <i>meiMIGS-PPX1</i> T <sub>1</sub> | 241   | 211 | 1428 | 297  | 2177  | 23.53 | 3.29 | 3.05 |       |      |                                                                                                     |
| <i>meiMIGS-PPX1</i> T <sub>1</sub> | 238   | 201 | 1450 | 323  | 2212  | 22.34 | 3.22 | 2.94 |       |      |                                                                                                     |

|                                        |     |     |      |     |      |       |      |      |       |      |                                                                                                                        |
|----------------------------------------|-----|-----|------|-----|------|-------|------|------|-------|------|------------------------------------------------------------------------------------------------------------------------|
| <i>meiMIGS-PPX1 T<sub>1</sub></i>      | 177 | 185 | 1159 | 266 | 1787 | 22.87 | 2.96 | 3.03 |       |      |                                                                                                                        |
| <i>meiMIGS-PPX1 T<sub>1</sub></i>      | 94  | 107 | 650  | 146 | 997  | 22.75 | 2.94 | 3.15 |       |      |                                                                                                                        |
| <i>meiMIGS-PPX1-PPX2 T<sub>1</sub></i> | 189 | 223 | 952  | 163 | 1527 | 32.15 | 2.96 | 3.34 | 28.06 | 2.1  | 9.45×10 <sup>-14</sup><br>Between <i>hcr1</i><br>and <i>meiMIGS-PPX1-PPX2 T<sub>1</sub></i> =<br>3.75×10 <sup>-5</sup> |
| <i>meiMIGS-PPX1-PPX2 T<sub>1</sub></i> | 211 | 220 | 1120 | 252 | 1803 | 27.76 | 2.82 | 2.89 |       |      |                                                                                                                        |
| <i>meiMIGS-PPX1-PPX2 T<sub>1</sub></i> | 160 | 182 | 954  | 146 | 1442 | 27.5  | 3.4  | 3.71 |       |      |                                                                                                                        |
| <i>meiMIGS-PPX1-PPX2 T<sub>1</sub></i> | 206 | 302 | 1399 | 318 | 2225 | 26.29 | 2.59 | 3.25 |       |      |                                                                                                                        |
| <i>meiMIGS-PPX1-PPX2 T<sub>1</sub></i> | 108 | 100 | 495  | 105 | 808  | 30.35 | 2.94 | 2.79 |       |      |                                                                                                                        |
| <i>meiMIGS-PPX1-PPX2 T<sub>1</sub></i> | 205 | 185 | 1017 | 226 | 1633 | 27.73 | 2.97 | 2.79 |       |      |                                                                                                                        |
| <i>meiMIGS-PPX1-PPX2 T<sub>1</sub></i> | 162 | 155 | 852  | 190 | 1359 | 26.96 | 2.94 | 2.86 |       |      |                                                                                                                        |
| <i>meiMIGS-PPX1-PPX2 T<sub>1</sub></i> | 181 | 168 | 969  | 189 | 1507 | 26.73 | 3.22 | 3.07 |       |      |                                                                                                                        |
| <i>meiMIGS-PPX1-PPX2 T<sub>1</sub></i> | 113 | 117 | 582  | 136 | 948  | 28.25 | 2.75 | 2.81 |       |      |                                                                                                                        |
| <i>meiMIGS-PPX1-PPX2 T<sub>1</sub></i> | 127 | 117 | 629  | 128 | 1001 | 28.41 | 3.09 | 2.93 |       |      |                                                                                                                        |
| <i>meiMIGS-PPX1-PPX2 T<sub>1</sub></i> | 127 | 116 | 637  | 140 | 1020 | 27.64 | 2.98 | 2.82 |       |      |                                                                                                                        |
| <i>meiMIGS-PPX1-PPX2 T<sub>1</sub></i> | 136 | 173 | 791  | 175 | 1275 | 28.22 | 2.66 | 3.1  |       |      |                                                                                                                        |
| <i>meiMIGS-PPX1-PPX2 T<sub>1</sub></i> | 176 | 170 | 951  | 192 | 1489 | 26.84 | 3.11 | 3.05 |       |      |                                                                                                                        |
| <i>meiMIGS-PPX1-PPX2 T<sub>1</sub></i> | 164 | 196 | 953  | 246 | 1559 | 26.64 | 2.53 | 2.8  |       |      |                                                                                                                        |
| <i>meiMIGS-PPX1-PPX2 T<sub>1</sub></i> | 122 | 110 | 489  | 112 | 833  | 33.44 | 2.75 | 2.56 |       |      |                                                                                                                        |
| <i>meiMIGS-PPX1-PPX2 T<sub>1</sub></i> | 157 | 147 | 814  | 192 | 1310 | 26.8  | 2.86 | 2.75 |       |      |                                                                                                                        |
| <i>meiMIGS-PPX1-PPX2 T<sub>1</sub></i> | 187 | 181 | 1059 | 240 | 1667 | 25.27 | 2.96 | 2.9  |       |      |                                                                                                                        |
| <i>meiMIGS-PPX1 T<sub>2</sub> #1</i>   | 297 | 292 | 1517 | 307 | 2413 | 28.46 | 3.03 | 3    | 27.43 | 1.81 | 8.12×10 <sup>-9</sup>                                                                                                  |
| <i>meiMIGS-PPX1 T<sub>2</sub> #1</i>   | 296 | 261 | 1406 | 299 | 2262 | 28.76 | 3.04 | 2.8  |       |      |                                                                                                                        |
| <i>meiMIGS-PPX1 T<sub>2</sub> #1</i>   | 306 | 290 | 1454 | 287 | 2337 | 30    | 3.05 | 2.94 |       |      |                                                                                                                        |
| <i>meiMIGS-PPX1 T<sub>2</sub> #1</i>   | 274 | 285 | 1563 | 339 | 2461 | 26.13 | 2.94 | 3.01 |       |      |                                                                                                                        |
| <i>meiMIGS-PPX1 T<sub>2</sub> #1</i>   | 263 | 272 | 1488 | 329 | 2352 | 26.17 | 2.91 | 2.97 |       |      |                                                                                                                        |
| <i>meiMIGS-PPX1 T<sub>2</sub> #1</i>   | 265 | 255 | 1426 | 311 | 2257 | 26.57 | 2.99 | 2.92 |       |      |                                                                                                                        |
| <i>meiMIGS-PPX1 T<sub>2</sub> #1</i>   | 298 | 296 | 1488 | 286 | 2368 | 29.41 | 3.07 | 3.05 |       |      |                                                                                                                        |
| <i>meiMIGS-PPX1 T<sub>2</sub> #1</i>   | 295 | 274 | 1697 | 378 | 2644 | 24.53 | 3.06 | 2.93 |       |      |                                                                                                                        |
| <i>meiMIGS-PPX1 T<sub>2</sub> #1</i>   | 262 | 263 | 1420 | 317 | 2262 | 26.8  | 2.9  | 2.91 |       |      |                                                                                                                        |
| <i>meiMIGS-PPX1 T<sub>2</sub> #1</i>   | 299 | 280 | 1707 | 369 | 2655 | 24.91 | 3.09 | 2.97 |       |      |                                                                                                                        |
| <i>meiMIGS-PPX1 T<sub>2</sub> #1</i>   | 230 | 224 | 1529 | 372 | 2355 | 21.61 | 2.95 | 2.91 | 25.07 | 2.17 | 3.41×10 <sup>-6</sup>                                                                                                  |
| <i>meiMIGS-PPX1 T<sub>2</sub> #1</i>   | 272 | 254 | 1501 | 335 | 2362 | 25.53 | 3.01 | 2.89 |       |      |                                                                                                                        |
| <i>meiMIGS-PPX1 T<sub>2</sub> #1</i>   | 297 | 285 | 1435 | 304 | 2321 | 29.4  | 2.94 | 2.86 |       |      |                                                                                                                        |
| <i>meiMIGS-PPX1 T<sub>2</sub> #1</i>   | 247 | 232 | 1438 | 335 | 2252 | 24.2  | 2.97 | 2.87 |       |      |                                                                                                                        |
| <i>meiMIGS-PPX1 T<sub>2</sub> #1</i>   | 221 | 184 | 1269 | 265 | 1939 | 23.69 | 3.32 | 2.99 |       |      |                                                                                                                        |
| <i>meiMIGS-PPX1 T<sub>2</sub> #1</i>   | 250 | 250 | 1493 | 337 | 2330 | 24.45 | 2.97 | 2.97 |       |      |                                                                                                                        |
| <i>meiMIGS-PPX1 T<sub>2</sub> #1</i>   | 283 | 261 | 1596 | 361 | 2501 | 24.84 | 3.02 | 2.88 |       |      |                                                                                                                        |
| <i>meiMIGS-PPX1 T<sub>2</sub> #1</i>   | 274 | 285 | 1515 | 317 | 2391 | 27.03 | 2.97 | 3.05 |       |      |                                                                                                                        |
| <i>meiMIGS-PPX2 T<sub>2</sub> #1</i>   | 274 | 261 | 1752 | 402 | 2689 | 22.41 | 3.06 | 2.98 |       |      |                                                                                                                        |
| <i>meiMIGS-PPX2 T<sub>2</sub> #1</i>   | 250 | 246 | 1759 | 494 | 2749 | 20.05 | 2.71 | 2.69 |       |      |                                                                                                                        |
| <i>meiMIGS-PPX2 T<sub>2</sub> #1</i>   | 282 | 273 | 1734 | 430 | 2719 | 23.07 | 2.87 | 2.82 |       |      |                                                                                                                        |
| <i>meiMIGS-PPX2 T<sub>2</sub> #1</i>   | 256 | 224 | 1780 | 457 | 2717 | 19.58 | 2.99 | 2.81 |       |      |                                                                                                                        |



|                                           |     |     |      |     |      |       |      |      |       |      |                                                                                            |
|-------------------------------------------|-----|-----|------|-----|------|-------|------|------|-------|------|--------------------------------------------------------------------------------------------|
| <i>meiMIGS-PPX2 T<sub>2</sub> #1</i>      | 281 | 282 | 1735 | 500 | 2798 | 22.7  | 2.58 | 2.58 |       |      |                                                                                            |
| <i>meiMIGS-PPX2 T<sub>2</sub> #1</i>      | 272 | 268 | 1692 | 387 | 2619 | 23.34 | 3    | 2.97 |       |      |                                                                                            |
| <i>meiMIGS-PPX2 T<sub>2</sub> #1</i>      | 258 | 272 | 1645 | 388 | 2563 | 23.42 | 2.88 | 2.97 |       |      |                                                                                            |
| <i>meiMIGS-PPX2 T<sub>2</sub> #1</i>      | 287 | 247 | 1732 | 381 | 2647 | 22.77 | 3.21 | 2.96 |       |      |                                                                                            |
| <i>meiMIGS-PPX2 T<sub>2</sub> #1</i>      | 304 | 317 | 1705 | 429 | 2755 | 25.89 | 2.69 | 2.76 |       |      |                                                                                            |
| <i>meiMIGS-PPX2 T<sub>2</sub> #1</i>      | 231 | 218 | 1424 | 333 | 2206 | 23    | 3    | 2.91 |       |      |                                                                                            |
| <i>meiMIGS-PPX2 T<sub>2</sub> #1</i>      | 309 | 359 | 1637 | 491 | 2796 | 27.74 | 2.29 | 2.5  |       |      |                                                                                            |
| <i>meiMIGS-PPX2 T<sub>2</sub> #1</i>      | 275 | 259 | 1730 | 523 | 2787 | 21.46 | 2.56 | 2.49 |       |      |                                                                                            |
| <i>meiMIGS-PPX2 T<sub>2</sub> #1</i>      | 292 | 281 | 1720 | 438 | 2731 | 23.82 | 2.8  | 2.74 |       |      |                                                                                            |
| <i>meiMIGS-PPX2 T<sub>2</sub> #1</i>      | 210 | 211 | 1326 | 323 | 2070 | 22.98 | 2.88 | 2.88 | 25.33 | 2.91 | 4.49×10 <sup>-5</sup>                                                                      |
| <i>meiMIGS-PPX2 T<sub>2</sub> #1</i>      | 296 | 282 | 1463 | 283 | 2324 | 29.11 | 3.11 | 3.01 |       |      |                                                                                            |
| <i>meiMIGS-PPX2 T<sub>2</sub> #1</i>      | 278 | 311 | 1440 | 311 | 2340 | 29.53 | 2.76 | 2.97 |       |      |                                                                                            |
| <i>meiMIGS-PPX2 T<sub>2</sub> #1</i>      | 271 | 288 | 1574 | 331 | 2464 | 26.09 | 2.98 | 3.09 |       |      |                                                                                            |
| <i>meiMIGS-PPX2 T<sub>2</sub> #1</i>      | 296 | 306 | 1707 | 516 | 2825 | 24.25 | 2.44 | 2.48 |       |      |                                                                                            |
| <i>meiMIGS-PPX1-PPX2 T<sub>2</sub> #1</i> | 324 | 300 | 1234 | 203 | 2061 | 37.19 | 3.1  | 2.91 |       |      |                                                                                            |
| <i>meiMIGS-PPX1-PPX2 T<sub>2</sub> #1</i> | 291 | 296 | 1274 | 211 | 2072 | 34.17 | 3.09 | 3.13 |       |      |                                                                                            |
| <i>meiMIGS-PPX1-PPX2 T<sub>2</sub> #1</i> | 263 | 277 | 1098 | 189 | 1827 | 36.06 | 2.92 | 3.04 |       |      |                                                                                            |
| <i>meiMIGS-PPX1-PPX2 T<sub>2</sub> #1</i> | 344 | 326 | 1305 | 196 | 2171 | 38.13 | 3.16 | 3.02 |       |      |                                                                                            |
| <i>meiMIGS-PPX1-PPX2 T<sub>2</sub> #1</i> | 287 | 288 | 1250 | 217 | 2042 | 33.91 | 3.04 | 3.05 |       |      |                                                                                            |
| <i>meiMIGS-PPX1-PPX2 T<sub>2</sub> #1</i> | 270 | 259 | 1056 | 152 | 1737 | 37.48 | 3.23 | 3.12 | 36.71 | 1.47 | 2.2×10 <sup>-16</sup>                                                                      |
| <i>meiMIGS-PPX1-PPX2 T<sub>2</sub> #1</i> | 211 | 213 | 814  | 137 | 1375 | 38.09 | 2.93 | 2.95 |       |      | Between <i>hcr1</i> and <i>meiMIGS-PPX1-PPX2 T<sub>2</sub> #1</i> = 3.96×10 <sup>-14</sup> |
| <i>meiMIGS-PPX1-PPX2 T<sub>2</sub> #1</i> | 262 | 231 | 994  | 138 | 1625 | 37.29 | 3.4  | 3.06 |       |      |                                                                                            |
| <i>meiMIGS-PPX1-PPX2 T<sub>2</sub> #1</i> | 212 | 220 | 840  | 139 | 1411 | 37.74 | 2.93 | 3.02 |       |      |                                                                                            |
| <i>meiMIGS-PPX1-PPX2 T<sub>2</sub> #1</i> | 259 | 253 | 1043 | 168 | 1723 | 36.31 | 3.09 | 3.04 |       |      |                                                                                            |
| <i>meiMIGS-PPX1-PPX2 T<sub>2</sub> #1</i> | 167 | 150 | 632  | 92  | 1041 | 37.47 | 3.3  | 3.02 |       |      |                                                                                            |
| <i>meiMIGS-PPX1-PPX2 T<sub>2</sub> #1</i> | 224 | 234 | 1180 | 244 | 1882 | 28.36 | 2.94 | 3.02 |       |      |                                                                                            |
| <i>meiMIGS-PPX1-PPX2 T<sub>2</sub> #1</i> | 455 | 446 | 1018 | 33  | 1952 | 27.72 | 3.08 | 3    |       |      |                                                                                            |
| <i>meiMIGS-PPX1-PPX2 T<sub>2</sub> #1</i> | 194 | 217 | 1166 | 267 | 1844 | 25.55 | 2.81 | 3    |       |      |                                                                                            |
| <i>meiMIGS-PPX1-PPX2 T<sub>2</sub> #1</i> | 232 | 215 | 1190 | 238 | 1875 | 27.67 | 3.14 | 2.99 |       |      |                                                                                            |
| <i>meiMIGS-PPX1-PPX2 T<sub>2</sub> #1</i> | 212 | 201 | 959  | 174 | 1546 | 31.76 | 3.12 | 3.01 |       |      |                                                                                            |
| <i>meiMIGS-PPX1-PPX2 T<sub>2</sub> #1</i> | 221 | 217 | 1239 | 267 | 1944 | 25.88 | 3.02 | 2.98 | 26.88 | 2.09 | 4.93×10 <sup>-9</sup>                                                                      |
| <i>meiMIGS-PPX1-PPX2 T<sub>2</sub> #1</i> | 117 | 111 | 712  | 155 | 1095 | 23.61 | 3.12 | 3.03 |       |      |                                                                                            |
| <i>meiMIGS-PPX1-PPX2 T<sub>2</sub> #1</i> | 216 | 198 | 1140 | 227 | 1781 | 26.85 | 3.19 | 3.02 |       |      |                                                                                            |
| <i>meiMIGS-PPX1-PPX2 T<sub>2</sub> #1</i> | 125 | 145 | 777  | 180 | 1227 | 25.17 | 2.78 | 3.02 |       |      |                                                                                            |
| <i>meiMIGS-PPX1-PPX2 T<sub>2</sub> #1</i> | 194 | 173 | 1042 | 184 | 1593 | 26.57 | 3.46 | 3.21 |       |      |                                                                                            |
| <i>meiMIGS-PPX1-PPX2 T<sub>2</sub> #1</i> | 155 | 170 | 889  | 198 | 1412 | 26.54 | 2.84 | 3    |       |      |                                                                                            |

**Supplementary Table 9. Seed based FTL crossover frequency in wild type and *hcr1*.** FTL crossover frequency was measured by analyzing counts of fluorescence and non-fluorescent seeds from 420/++ hemizygote plants, using CellProfiler<sup>1,2</sup>. In the seeds from self-fertilized FTL hemizygote plants, CellProfiler determines the numbers of green-alone fluorescent seeds ( $N_{Green}$ ), red-alone fluorescent seeds ( $N_{Red}$ ) and total seeds ( $N_{Total}$ ). Crossover frequency (cM) is calculated using the formula:  $cM = 100 \times (1 - [1 - 2(N_{Green} + N_{Red})/N_{Total}]^{1/2})^{3,4}$ . *P* values were calculated using one-sided Welch's t-test, which assessed significant differences between wild type and *hcr1-1* in each seed based FTL line<sup>7</sup>.

| CTL  | Genotype      | Green | Red | Both | None | Total | cM    | G/nG | R/nR | Mean  | SD   | <i>P</i> value        |
|------|---------------|-------|-----|------|------|-------|-------|------|------|-------|------|-----------------------|
| 1.17 | Wild type     | 225   | 214 | 1492 | 324  | 2255  | 21.86 | 3.19 | 3.11 | 22.83 | 1.73 |                       |
| 1.17 | Wild type     | 213   | 241 | 1527 | 355  | 2336  | 21.81 | 2.92 | 3.11 |       |      |                       |
| 1.17 | Wild type     | 257   | 230 | 1520 | 328  | 2335  | 23.65 | 3.18 | 2.99 |       |      |                       |
| 1.17 | Wild type     | 269   | 254 | 1499 | 330  | 2352  | 25.48 | 3.03 | 2.93 |       |      |                       |
| 1.17 | Wild type     | 211   | 202 | 1407 | 346  | 2166  | 21.35 | 2.95 | 2.89 |       |      |                       |
| 1.17 | <i>hcr1-1</i> | 96    | 107 | 456  | 72   | 731   | 33.32 | 3.08 | 3.35 | 32.23 | 3.09 | $1.08 \times 10^{-4}$ |
| 1.17 | <i>hcr1-1</i> | 299   | 319 | 1338 | 291  | 2247  | 32.92 | 2.68 | 2.81 |       |      |                       |
| 1.17 | <i>hcr1-1</i> | 221   | 230 | 1188 | 230  | 1869  | 28.07 | 3.06 | 3.14 |       |      |                       |
| 1.17 | <i>hcr1-1</i> | 242   | 295 | 1056 | 181  | 1774  | 37.18 | 2.73 | 3.19 |       |      |                       |
| 1.17 | <i>hcr1-1</i> | 171   | 152 | 783  | 152  | 1258  | 30.25 | 3.14 | 2.89 |       |      |                       |
| 1.17 | <i>hcr1-1</i> | 323   | 301 | 1488 | 233  | 2345  | 31.6  | 3.39 | 3.22 |       |      |                       |
| 1.26 | Wild type     | 24    | 37  | 1849 | 659  | 2569  | 2.4   | 2.69 | 2.76 | 2.76  | 0.43 |                       |
| 1.26 | Wild type     | 31    | 34  | 1951 | 671  | 2687  | 2.45  | 2.81 | 2.83 |       |      |                       |
| 1.26 | Wild type     | 40    | 40  | 1954 | 674  | 2708  | 3     | 2.79 | 2.79 |       |      |                       |
| 1.26 | Wild type     | 33    | 38  | 1389 | 527  | 1987  | 3.64  | 2.52 | 2.55 |       |      |                       |
| 1.26 | Wild type     | 42    | 26  | 1966 | 609  | 2643  | 2.61  | 3.16 | 3.06 |       |      |                       |
| 1.26 | Wild type     | 34    | 33  | 1851 | 666  | 2584  | 2.63  | 2.7  | 2.69 |       |      |                       |
| 1.26 | Wild type     | 36    | 36  | 2053 | 673  | 2798  | 2.61  | 2.95 | 2.95 |       |      |                       |
| 1.26 | <i>hcr1-1</i> | 83    | 67  | 2280 | 738  | 3168  | 4.85  | 2.94 | 2.86 | 4.25  | 0.29 | $7.21 \times 10^{-6}$ |
| 1.26 | <i>hcr1-1</i> | 80    | 60  | 2543 | 811  | 3494  | 4.09  | 3.01 | 2.92 |       |      |                       |
| 1.26 | <i>hcr1-1</i> | 66    | 83  | 2590 | 833  | 3572  | 4.26  | 2.9  | 2.97 |       |      |                       |
| 1.26 | <i>hcr1-1</i> | 75    | 64  | 2565 | 809  | 3513  | 4.04  | 3.02 | 2.97 |       |      |                       |
| 1.26 | <i>hcr1-1</i> | 57    | 72  | 2392 | 788  | 3309  | 3.98  | 2.85 | 2.92 |       |      |                       |
| 1.26 | <i>hcr1-1</i> | 71    | 62  | 2347 | 741  | 3221  | 4.22  | 3.01 | 2.97 |       |      |                       |
| 1.26 | <i>hcr1-1</i> | 69    | 65  | 2304 | 730  | 3168  | 4.32  | 2.98 | 2.96 |       |      |                       |
| 3.15 | Wild type     | 68    | 76  | 488  | 117  | 749   | 21.55 | 2.88 | 3.05 | 23.46 | 2.15 |                       |
| 3.15 | Wild type     | 217   | 196 | 1113 | 250  | 1776  | 26.86 | 2.98 | 2.8  |       |      |                       |
| 3.15 | Wild type     | 268   | 283 | 1646 | 381  | 2578  | 24.33 | 2.88 | 2.97 |       |      |                       |
| 3.15 | Wild type     | 167   | 193 | 1235 | 259  | 1854  | 21.79 | 3.1  | 3.35 |       |      |                       |
| 3.15 | Wild type     | 204   | 152 | 1175 | 235  | 1766  | 22.75 | 3.56 | 3.02 |       |      |                       |
| 3.15 | Wild type     | 182   | 204 | 1023 | 264  | 1673  | 26.61 | 2.57 | 2.75 |       |      |                       |
| 3.15 | Wild type     | 146   | 170 | 1002 | 215  | 1533  | 23.34 | 2.98 | 3.25 |       |      |                       |
| 3.15 | Wild type     | 102   | 97  | 661  | 114  | 974   | 23.1  | 3.62 | 3.51 |       |      |                       |
| 3.15 | Wild type     | 169   | 175 | 1051 | 224  | 1619  | 24.17 | 3.06 | 3.12 |       |      |                       |
| 3.15 | Wild type     | 158   | 144 | 1129 | 242  | 1673  | 20.06 | 3.33 | 3.18 |       |      |                       |
| 3.15 | <i>hcr1-1</i> | 221   | 191 | 936  | 181  | 1529  | 32.1  | 3.11 | 2.8  | 29.29 | 1.6  | $1.08 \times 10^{-6}$ |
| 3.15 | <i>hcr1-1</i> | 174   | 207 | 968  | 180  | 1529  | 29.17 | 2.95 | 3.32 |       |      |                       |

|      |               |     |     |      |     |      |       |      |      |       |      |                       |
|------|---------------|-----|-----|------|-----|------|-------|------|------|-------|------|-----------------------|
| 3.15 | <i>hcr1-1</i> | 221 | 216 | 1175 | 219 | 1831 | 27.7  | 3.21 | 3.16 |       |      |                       |
| 3.15 | <i>hcr1-1</i> | 224 | 243 | 1258 | 227 | 1952 | 27.78 | 3.15 | 3.33 |       |      |                       |
| 3.15 | <i>hcr1-1</i> | 121 | 119 | 639  | 132 | 1011 | 27.53 | 3.03 | 3    |       |      |                       |
| 3.15 | <i>hcr1-1</i> | 234 | 246 | 1154 | 220 | 1854 | 30.56 | 2.98 | 3.08 |       |      |                       |
| 3.15 | <i>hcr1-1</i> | 246 | 253 | 1225 | 215 | 1939 | 30.34 | 3.14 | 3.21 |       |      |                       |
| 3.15 | <i>hcr1-1</i> | 90  | 136 | 588  | 109 | 923  | 28.57 | 2.77 | 3.64 |       |      |                       |
| 3.15 | <i>hcr1-1</i> | 50  | 49  | 256  | 51  | 406  | 28.42 | 3.06 | 3.02 |       |      |                       |
| 3.15 | <i>hcr1-1</i> | 151 | 161 | 857  | 146 | 1315 | 27.51 | 3.28 | 3.43 |       |      |                       |
| 3.15 | <i>hcr1-1</i> | 203 | 223 | 1030 | 187 | 1643 | 30.61 | 3.01 | 3.21 |       |      |                       |
| 3.15 | <i>hcr1-1</i> | 253 | 239 | 1154 | 224 | 1870 | 31.17 | 3.04 | 2.92 |       |      |                       |
| 5.11 | Wild type     | 298 | 245 | 1518 | 408 | 2469 | 25.16 | 2.78 | 2.5  |       |      |                       |
| 5.11 | Wild type     | 192 | 272 | 1719 | 407 | 2590 | 19.89 | 2.81 | 3.32 |       |      |                       |
| 5.11 | Wild type     | 287 | 235 | 1539 | 417 | 2478 | 23.93 | 2.8  | 2.52 |       |      |                       |
| 5.11 | Wild type     | 238 | 180 | 1346 | 342 | 2106 | 22.34 | 3.03 | 2.63 |       |      |                       |
| 5.11 | Wild type     | 221 | 258 | 1409 | 363 | 2251 | 24.21 | 2.62 | 2.85 |       |      |                       |
| 5.11 | Wild type     | 175 | 170 | 1099 | 270 | 1714 | 22.71 | 2.9  | 2.85 | 22.22 | 1.8  |                       |
| 5.11 | Wild type     | 232 | 198 | 1489 | 343 | 2262 | 21.27 | 3.18 | 2.93 |       |      |                       |
| 5.11 | Wild type     | 163 | 113 | 924  | 273 | 1473 | 20.93 | 2.82 | 2.38 |       |      |                       |
| 5.11 | Wild type     | 204 | 180 | 1427 | 332 | 2143 | 19.9  | 3.19 | 3    |       |      |                       |
| 5.11 | Wild type     | 258 | 189 | 1456 | 397 | 2300 | 21.81 | 2.92 | 2.51 |       |      |                       |
| 5.11 | <i>hcr1-1</i> | 240 | 204 | 1375 | 405 | 2224 | 22.49 | 2.65 | 2.45 |       |      |                       |
| 5.11 | <i>hcr1-1</i> | 244 | 204 | 1587 | 411 | 2446 | 20.4  | 2.98 | 2.73 |       |      |                       |
| 5.11 | <i>hcr1-1</i> | 228 | 213 | 1383 | 302 | 2126 | 23.51 | 3.13 | 3.01 |       |      |                       |
| 5.11 | <i>hcr1-1</i> | 206 | 265 | 1602 | 325 | 2398 | 22.08 | 3.06 | 3.52 |       |      |                       |
| 5.11 | <i>hcr1-1</i> | 157 | 147 | 980  | 257 | 1541 | 22.19 | 2.81 | 2.72 | 21.95 | 1.02 | 0.652                 |
| 5.11 | <i>hcr1-1</i> | 205 | 193 | 1454 | 323 | 2175 | 20.37 | 3.22 | 3.12 |       |      |                       |
| 5.11 | <i>hcr1-1</i> | 236 | 223 | 1439 | 387 | 2285 | 22.65 | 2.75 | 2.67 |       |      |                       |
| 5.11 | <i>hcr1-1</i> | 232 | 234 | 1556 | 345 | 2367 | 22.14 | 3.09 | 3.1  |       |      |                       |
| 5.11 | <i>hcr1-1</i> | 256 | 188 | 1481 | 367 | 2292 | 21.73 | 3.13 | 2.68 |       |      |                       |
| 5.14 | Wild type     | 97  | 75  | 1299 | 503 | 1974 | 9.13  | 2.42 | 2.29 |       |      |                       |
| 5.14 | Wild type     | 112 | 82  | 1208 | 523 | 1925 | 10.64 | 2.18 | 2.03 |       |      |                       |
| 5.14 | Wild type     | 64  | 91  | 1236 | 529 | 1920 | 8.43  | 2.1  | 2.24 |       |      |                       |
| 5.14 | Wild type     | 91  | 74  | 1267 | 536 | 1968 | 8.77  | 2.23 | 2.14 |       |      |                       |
| 5.14 | Wild type     | 65  | 49  | 902  | 355 | 1371 | 8.69  | 2.39 | 2.26 |       |      |                       |
| 5.14 | Wild type     | 80  | 80  | 1229 | 464 | 1853 | 9.04  | 2.41 | 2.41 | 9.23  | 0.64 |                       |
| 5.14 | Wild type     | 77  | 51  | 920  | 340 | 1388 | 9.69  | 2.55 | 2.33 |       |      |                       |
| 5.14 | Wild type     | 82  | 72  | 1164 | 479 | 1797 | 8.97  | 2.26 | 2.2  |       |      |                       |
| 5.14 | Wild type     | 84  | 103 | 1346 | 501 | 2034 | 9.66  | 2.37 | 2.48 |       |      |                       |
| 5.14 | Wild type     | 85  | 90  | 1338 | 574 | 2087 | 8.77  | 2.14 | 2.17 |       |      |                       |
| 5.14 | Wild type     | 69  | 99  | 1141 | 510 | 1819 | 9.71  | 1.99 | 2.14 |       |      |                       |
| 5.14 | <i>hcr1-1</i> | 91  | 84  | 1147 | 470 | 1792 | 10.3  | 2.23 | 2.19 |       |      |                       |
| 5.14 | <i>hcr1-1</i> | 88  | 101 | 1127 | 432 | 1748 | 11.47 | 2.28 | 2.36 |       |      |                       |
| 5.14 | <i>hcr1-1</i> | 82  | 94  | 1099 | 480 | 1755 | 10.59 | 2.06 | 2.12 |       |      |                       |
| 5.14 | <i>hcr1-1</i> | 94  | 82  | 1167 | 498 | 1841 | 10.07 | 2.17 | 2.11 | 11.92 | 1.31 | 8.33×10 <sup>-7</sup> |
| 5.14 | <i>hcr1-1</i> | 104 | 110 | 1284 | 510 | 2008 | 11.3  | 2.24 | 2.27 |       |      |                       |
| 5.14 | <i>hcr1-1</i> | 104 | 108 | 1335 | 492 | 2039 | 11    | 2.4  | 2.42 |       |      |                       |

|      |               |     |     |      |     |      |       |      |      |  |  |  |
|------|---------------|-----|-----|------|-----|------|-------|------|------|--|--|--|
| 5.14 | <i>hcr1-1</i> | 120 | 110 | 1330 | 511 | 2071 | 11.8  | 2.33 | 2.28 |  |  |  |
| 5.14 | <i>hcr1-1</i> | 122 | 119 | 1186 | 468 | 1895 | 13.65 | 2.23 | 2.21 |  |  |  |
| 5.14 | <i>hcr1-1</i> | 111 | 129 | 1112 | 470 | 1822 | 14.18 | 2.04 | 2.14 |  |  |  |
| 5.14 | <i>hcr1-1</i> | 102 | 93  | 1161 | 486 | 1842 | 11.22 | 2.18 | 2.13 |  |  |  |
| 5.14 | <i>hcr1-1</i> | 114 | 112 | 1243 | 464 | 1933 | 12.47 | 2.36 | 2.34 |  |  |  |
| 5.14 | <i>hcr1-1</i> | 101 | 109 | 1172 | 453 | 1835 | 12.19 | 2.27 | 2.31 |  |  |  |
| 5.14 | <i>hcr1-1</i> | 113 | 111 | 1136 | 498 | 1858 | 12.89 | 2.05 | 2.04 |  |  |  |
| 5.14 | <i>hcr1-1</i> | 95  | 102 | 970  | 375 | 1542 | 13.72 | 2.23 | 2.28 |  |  |  |

**Supplementary Table 10. Seed-based FTL crossover frequency in wild type and *meiMIGS-PPX1-PPX2*.** FTL crossover frequency was measured by analyzing counts of fluorescence and non-fluorescent seeds from *FTL*/++ hemizygote plants, using CellProfiler<sup>1,2</sup>. In the seeds from self-fertilized *FTL* hemizygote plants, CellProfiler determines the numbers of green-alone fluorescent seeds ( $N_{\text{Green}}$ ), red-alone fluorescent seeds ( $N_{\text{Red}}$ ) and total seeds ( $N_{\text{Total}}$ ). Crossover frequency (cM) is calculated using the formula:  $cM=100 \times (1 - [1 - 2(N_{\text{Green}} + N_{\text{Red}}) / N_{\text{Total}}]^{1/2})^{3,4}$ . *P* values were calculated using one-sided Welch's t-tests, which assessed significant differences between wild type and *meiMIGS-PPX1-PPX2*, in each seed based FTL line<sup>7</sup>.

| CTL  | Genotype                               | Green | Red | Both | None | Total | cM    | G/nG | R/nR | Mean  | SD   | <i>P</i> value        |
|------|----------------------------------------|-------|-----|------|------|-------|-------|------|------|-------|------|-----------------------|
| 1.13 | Wild type                              | 316   | 299 | 2019 | 502  | 3136  | 22.04 | 2.92 | 2.83 | 23.11 | 0.96 |                       |
| 1.13 | Wild type                              | 321   | 363 | 2324 | 503  | 3511  | 21.87 | 3.05 | 3.26 |       |      |                       |
| 1.13 | Wild type                              | 305   | 374 | 2225 | 488  | 3392  | 22.56 | 2.94 | 3.28 |       |      |                       |
| 1.13 | Wild type                              | 361   | 366 | 2211 | 494  | 3432  | 24.08 | 2.99 | 3.01 |       |      |                       |
| 1.13 | Wild type                              | 275   | 338 | 1891 | 461  | 2965  | 23.42 | 2.71 | 3.03 |       |      |                       |
| 1.13 | Wild type                              | 385   | 353 | 2208 | 516  | 3462  | 24.26 | 2.98 | 2.84 |       |      |                       |
| 1.13 | Wild type                              | 394   | 290 | 2136 | 471  | 3291  | 23.56 | 3.32 | 2.8  |       |      |                       |
| 1.13 | <i>meiMIGS-PPX1-PPX2 F<sub>1</sub></i> | 192   | 186 | 1093 | 257  | 1728  | 25    | 2.9  | 2.85 | 27.47 | 2.93 | $6.72 \times 10^{-3}$ |
| 1.13 | <i>meiMIGS-PPX1-PPX2 F<sub>1</sub></i> | 176   | 166 | 834  | 186  | 1362  | 29.45 | 2.87 | 2.76 |       |      |                       |
| 1.13 | <i>meiMIGS-PPX1-PPX2 F<sub>1</sub></i> | 217   | 197 | 1078 | 227  | 1719  | 28.01 | 3.05 | 2.87 |       |      |                       |
| 1.13 | <i>meiMIGS-PPX1-PPX2 F<sub>1</sub></i> | 223   | 186 | 944  | 167  | 1520  | 32.04 | 3.31 | 2.9  |       |      |                       |
| 1.13 | <i>meiMIGS-PPX1-PPX2 F<sub>1</sub></i> | 147   | 178 | 973  | 220  | 1518  | 24.38 | 2.81 | 3.14 |       |      |                       |
| 1.13 | <i>meiMIGS-PPX1-PPX2 F<sub>1</sub></i> | 189   | 198 | 1083 | 244  | 1714  | 25.94 | 2.88 | 2.96 |       |      |                       |
| 1.22 | Wild type                              | 275   | 276 | 2057 | 502  | 3110  | 19.65 | 3    | 3    | 20.07 | 0.8  |                       |
| 1.22 | Wild type                              | 280   | 297 | 2075 | 524  | 3176  | 20.21 | 2.87 | 2.95 |       |      |                       |
| 1.22 | Wild type                              | 254   | 272 | 1835 | 461  | 2822  | 20.8  | 2.85 | 2.95 |       |      |                       |
| 1.22 | Wild type                              | 266   | 294 | 2011 | 523  | 3094  | 20.12 | 2.79 | 2.92 |       |      |                       |
| 1.22 | Wild type                              | 291   | 293 | 2016 | 483  | 3083  | 21.19 | 2.97 | 2.98 |       |      |                       |
| 1.22 | Wild type                              | 249   | 299 | 2011 | 521  | 3080  | 19.74 | 2.76 | 3    |       |      |                       |
| 1.22 | Wild type                              | 241   | 263 | 1960 | 500  | 2964  | 18.76 | 2.88 | 3    |       |      |                       |
| 1.22 | <i>meiMIGS-PPX1-PPX2 F<sub>1</sub></i> | 225   | 204 | 1275 | 282  | 1986  | 24.64 | 3.09 | 2.92 | 24.45 | 1.02 | $8.42 \times 10^{-9}$ |
| 1.22 | <i>meiMIGS-PPX1-PPX2 F<sub>1</sub></i> | 215   | 208 | 1237 | 291  | 1951  | 24.74 | 2.91 | 2.86 |       |      |                       |
| 1.22 | <i>meiMIGS-PPX1-PPX2 F<sub>1</sub></i> | 209   | 189 | 1274 | 257  | 1929  | 23.36 | 3.33 | 3.14 |       |      |                       |
| 1.22 | <i>meiMIGS-PPX1-PPX2 F<sub>1</sub></i> | 173   | 185 | 1087 | 263  | 1708  | 23.79 | 2.81 | 2.92 |       |      |                       |
| 1.22 | <i>meiMIGS-PPX1-PPX2 F<sub>1</sub></i> | 203   | 206 | 1200 | 281  | 1890  | 24.69 | 2.88 | 2.9  |       |      |                       |
| 1.22 | <i>meiMIGS-PPX1-PPX2 F<sub>1</sub></i> | 202   | 204 | 1183 | 264  | 1853  | 25.05 | 2.96 | 2.98 |       |      |                       |
| 1.22 | <i>meiMIGS-PPX1-PPX2 F<sub>1</sub></i> | 266   | 265 | 1660 | 373  | 2564  | 23.46 | 3.02 | 3.01 |       |      |                       |
| 1.22 | <i>meiMIGS-PPX1-PPX2 F<sub>1</sub></i> | 257   | 247 | 1657 | 381  | 2542  | 22.32 | 3.05 | 2.98 |       |      |                       |
| 1.22 | <i>meiMIGS-PPX1-PPX2 F<sub>1</sub></i> | 261   | 268 | 1521 | 347  | 2397  | 25.26 | 2.9  | 2.94 |       |      |                       |
| 1.22 | <i>meiMIGS-PPX1-PPX2 F<sub>1</sub></i> | 256   | 240 | 1511 | 327  | 2334  | 24.17 | 3.12 | 3    |       |      |                       |
| 1.22 | <i>meiMIGS-PPX1-PPX2 F<sub>1</sub></i> | 280   | 261 | 1620 | 372  | 2533  | 24.31 | 3    | 2.88 |       |      |                       |
| 1.22 | <i>meiMIGS-PPX1-PPX2 F<sub>1</sub></i> | 269   | 260 | 1454 | 303  | 2286  | 26.71 | 3.06 | 3    |       |      |                       |
| 1.22 | <i>meiMIGS-PPX1-PPX2 F<sub>1</sub></i> | 260   | 268 | 1567 | 353  | 2448  | 24.59 | 2.94 | 2.99 |       |      |                       |
| 1.22 | <i>meiMIGS-PPX1-PPX2 F<sub>1</sub></i> | 239   | 259 | 1548 | 337  | 2383  | 23.71 | 3    | 3.14 |       |      |                       |
| 1.22 | <i>meiMIGS-PPX1-PPX2 F<sub>1</sub></i> | 242   | 267 | 1499 | 370  | 2378  | 24.38 | 2.73 | 2.89 |       |      |                       |
| 1.22 | <i>meiMIGS-PPX1-PPX2 F<sub>1</sub></i> | 289   | 262 | 1547 | 337  | 2435  | 26.01 | 3.07 | 2.89 |       |      |                       |

|      |                                        |     |     |      |     |      |       |      |      |       |      |                       |
|------|----------------------------------------|-----|-----|------|-----|------|-------|------|------|-------|------|-----------------------|
| 1.22 | <i>meiMIGS-PPX1-PPX2 F<sub>1</sub></i> | 239 | 278 | 1498 | 399 | 2414 | 24.39 | 2.57 | 2.78 |       |      |                       |
| 2.2  | Wild type                              | 221 | 227 | 1599 | 364 | 2411 | 20.73 | 3.08 | 3.12 | 21.66 | 0.52 |                       |
| 2.2  | Wild type                              | 197 | 199 | 1373 | 327 | 2096 | 21.12 | 2.98 | 3    |       |      |                       |
| 2.2  | Wild type                              | 220 | 225 | 1522 | 356 | 2323 | 21.46 | 3    | 3.03 |       |      |                       |
| 2.2  | Wild type                              | 239 | 235 | 1565 | 375 | 2414 | 22.07 | 2.96 | 2.93 |       |      |                       |
| 2.2  | Wild type                              | 249 | 248 | 1671 | 400 | 2568 | 21.71 | 2.96 | 2.96 |       |      |                       |
| 2.2  | Wild type                              | 244 | 249 | 1633 | 378 | 2504 | 22.14 | 2.99 | 3.03 |       |      |                       |
| 2.2  | Wild type                              | 231 | 219 | 1490 | 346 | 2286 | 22.13 | 3.05 | 2.96 |       |      |                       |
| 2.2  | Wild type                              | 208 | 211 | 1394 | 337 | 2150 | 21.88 | 2.92 | 2.94 |       |      |                       |
| 2.2  | <i>meiMIGS-PPX1-PPX2 F<sub>1</sub></i> | 210 | 222 | 1074 | 233 | 1739 | 29.07 | 2.82 | 2.93 | 26.89 | 1.98 | 1.71×10 <sup>-3</sup> |
| 2.2  | <i>meiMIGS-PPX1-PPX2 F<sub>1</sub></i> | 187 | 178 | 1096 | 230 | 1691 | 24.61 | 3.14 | 3.06 |       |      |                       |
| 2.2  | <i>meiMIGS-PPX1-PPX2 F<sub>1</sub></i> | 233 | 235 | 1317 | 293 | 2078 | 25.87 | 2.94 | 2.95 |       |      |                       |
| 2.2  | <i>meiMIGS-PPX1-PPX2 F<sub>1</sub></i> | 181 | 173 | 900  | 179 | 1433 | 28.87 | 3.07 | 2.98 |       |      |                       |
| 2.2  | <i>meiMIGS-PPX1-PPX2 F<sub>1</sub></i> | 171 | 164 | 944  | 201 | 1480 | 26.02 | 3.05 | 2.98 |       |      |                       |
| 2.7  | Wild type                              | 248 | 228 | 1767 | 500 | 2743 | 19.2  | 2.77 | 2.67 | 20.85 | 1    |                       |
| 2.7  | Wild type                              | 247 | 236 | 1784 | 488 | 2755 | 19.42 | 2.81 | 2.75 |       |      |                       |
| 2.7  | Wild type                              | 234 | 219 | 1546 | 365 | 2364 | 21.47 | 3.05 | 2.95 |       |      |                       |
| 2.7  | Wild type                              | 234 | 250 | 1662 | 396 | 2542 | 21.31 | 2.93 | 3.03 |       |      |                       |
| 2.7  | Wild type                              | 264 | 259 | 1759 | 437 | 2719 | 21.56 | 2.91 | 2.88 |       |      |                       |
| 2.7  | Wild type                              | 256 | 269 | 1756 | 414 | 2695 | 21.87 | 2.95 | 3.02 |       |      |                       |
| 2.7  | Wild type                              | 264 | 257 | 1749 | 501 | 2771 | 21.01 | 2.66 | 2.62 |       |      |                       |
| 2.7  | Wild type                              | 268 | 252 | 1745 | 506 | 2771 | 20.96 | 2.66 | 2.58 |       |      |                       |
| 2.7  | <i>meiMIGS-PPX1-PPX2 F<sub>1</sub></i> | 208 | 203 | 1255 | 290 | 1956 | 23.86 | 2.97 | 2.93 | 24.6  | 0.85 | 3.75×10 <sup>-6</sup> |
| 2.7  | <i>meiMIGS-PPX1-PPX2 F<sub>1</sub></i> | 192 | 196 | 1141 | 257 | 1786 | 24.8  | 2.94 | 2.98 |       |      |                       |
| 2.7  | <i>meiMIGS-PPX1-PPX2 F<sub>1</sub></i> | 159 | 169 | 997  | 233 | 1558 | 23.91 | 2.88 | 2.97 |       |      |                       |
| 2.7  | <i>meiMIGS-PPX1-PPX2 F<sub>1</sub></i> | 173 | 173 | 1048 | 252 | 1646 | 23.87 | 2.87 | 2.87 |       |      |                       |
| 2.7  | <i>meiMIGS-PPX1-PPX2 F<sub>1</sub></i> | 166 | 176 | 982  | 221 | 1545 | 25.35 | 2.89 | 2.99 |       |      |                       |
| 2.7  | <i>meiMIGS-PPX1-PPX2 F<sub>1</sub></i> | 194 | 189 | 1080 | 241 | 1704 | 25.81 | 2.96 | 2.92 |       |      |                       |
| 4.7  | Wild type                              | 301 | 270 | 2133 | 545 | 3249 | 19.47 | 2.99 | 2.84 | 18.67 | 0.88 |                       |
| 4.7  | Wild type                              | 308 | 307 | 2329 | 557 | 3501 | 19.46 | 3.05 | 3.05 |       |      |                       |
| 4.7  | Wild type                              | 268 | 301 | 2166 | 510 | 3245 | 19.42 | 3    | 3.17 |       |      |                       |
| 4.7  | Wild type                              | 278 | 311 | 2227 | 564 | 3380 | 19.29 | 2.86 | 3.01 |       |      |                       |
| 4.7  | Wild type                              | 270 | 279 | 2115 | 563 | 3227 | 18.78 | 2.83 | 2.87 |       |      |                       |
| 4.7  | Wild type                              | 188 | 241 | 1746 | 470 | 2645 | 17.8  | 2.72 | 3.02 |       |      |                       |
| 4.7  | Wild type                              | 258 | 282 | 2245 | 564 | 3349 | 17.69 | 2.96 | 3.07 |       |      |                       |
| 4.7  | Wild type                              | 267 | 272 | 2215 | 633 | 3387 | 17.43 | 2.74 | 2.76 |       |      |                       |
| 4.7  | <i>meiMIGS-PPX1-PPX2 F<sub>1</sub></i> | 175 | 166 | 1075 | 335 | 1751 | 21.86 | 2.5  | 2.43 | 22.33 | 1.85 | 1.58×10 <sup>-3</sup> |
| 4.7  | <i>meiMIGS-PPX1-PPX2 F<sub>1</sub></i> | 178 | 124 | 954  | 275 | 1531 | 22.19 | 2.84 | 2.38 |       |      |                       |
| 4.7  | <i>meiMIGS-PPX1-PPX2 F<sub>1</sub></i> | 151 | 142 | 1035 | 290 | 1618 | 20.14 | 2.75 | 2.67 |       |      |                       |
| 4.7  | <i>meiMIGS-PPX1-PPX2 F<sub>1</sub></i> | 185 | 133 | 1046 | 284 | 1648 | 21.64 | 2.95 | 2.51 |       |      |                       |
| 4.7  | <i>meiMIGS-PPX1-PPX2 F<sub>1</sub></i> | 195 | 187 | 1032 | 290 | 1704 | 25.73 | 2.57 | 2.51 |       |      |                       |
| 4.7  | <i>meiMIGS-PPX1-PPX2 F<sub>1</sub></i> | 195 | 143 | 1070 | 291 | 1699 | 22.4  | 2.91 | 2.5  |       |      |                       |
| 5.1  | Wild type                              | 305 | 358 | 2320 | 615 | 3598 | 20.54 | 2.7  | 2.91 | 21.07 | 1.23 |                       |
| 5.1  | Wild type                              | 301 | 320 | 2074 | 483 | 3178 | 21.95 | 2.96 | 3.05 |       |      |                       |
| 5.1  | Wild type                              | 336 | 398 | 2563 | 623 | 3920 | 20.91 | 2.84 | 3.09 |       |      |                       |
| 5.1  | Wild type                              | 342 | 274 | 2133 | 544 | 3293 | 20.89 | 3.03 | 2.72 |       |      |                       |

|      |                                        |     |     |      |     |      |       |      |      |       |      |                       |
|------|----------------------------------------|-----|-----|------|-----|------|-------|------|------|-------|------|-----------------------|
| 5.1  | Wild type                              | 368 | 411 | 2517 | 548 | 3844 | 22.88 | 3.01 | 3.2  |       |      |                       |
| 5.1  | Wild type                              | 329 | 347 | 2578 | 627 | 3881 | 19.28 | 2.98 | 3.06 |       |      |                       |
| 5.1  | <i>meiMIGS-PPX1-PPX2 F<sub>1</sub></i> | 216 | 188 | 1191 | 281 | 1876 | 24.55 | 3    | 2.77 | 26.03 | 1.19 | 9.06×10 <sup>-6</sup> |
| 5.1  | <i>meiMIGS-PPX1-PPX2 F<sub>1</sub></i> | 223 | 223 | 1272 | 280 | 1998 | 25.6  | 2.97 | 2.97 |       |      |                       |
| 5.1  | <i>meiMIGS-PPX1-PPX2 F<sub>1</sub></i> | 209 | 228 | 1251 | 282 | 1970 | 25.41 | 2.86 | 3.01 |       |      |                       |
| 5.1  | <i>meiMIGS-PPX1-PPX2 F<sub>1</sub></i> | 225 | 232 | 1234 | 277 | 1968 | 26.82 | 2.87 | 2.92 |       |      |                       |
| 5.1  | <i>meiMIGS-PPX1-PPX2 F<sub>1</sub></i> | 268 | 218 | 1164 | 297 | 1947 | 29.23 | 2.78 | 2.45 |       |      |                       |
| 5.1  | <i>meiMIGS-PPX1-PPX2 F<sub>1</sub></i> | 240 | 235 | 1326 | 295 | 2096 | 26.06 | 2.95 | 2.92 |       |      |                       |
| 5.1  | <i>meiMIGS-PPX1-PPX2 F<sub>1</sub></i> | 287 | 295 | 1669 | 360 | 2611 | 25.56 | 2.99 | 3.04 |       |      |                       |
| 5.1  | <i>meiMIGS-PPX1-PPX2 F<sub>1</sub></i> | 289 | 286 | 1609 | 330 | 2514 | 26.34 | 3.08 | 3.06 |       |      |                       |
| 5.1  | <i>meiMIGS-PPX1-PPX2 F<sub>1</sub></i> | 278 | 288 | 1692 | 396 | 2654 | 24.27 | 2.88 | 2.94 |       |      |                       |
| 5.1  | <i>meiMIGS-PPX1-PPX2 F<sub>1</sub></i> | 299 | 295 | 1608 | 331 | 2533 | 27.13 | 3.05 | 3.02 |       |      |                       |
| 5.1  | <i>meiMIGS-PPX1-PPX2 F<sub>1</sub></i> | 295 | 292 | 1682 | 389 | 2658 | 25.28 | 2.9  | 2.89 |       |      |                       |
| 5.1  | <i>meiMIGS-PPX1-PPX2 F<sub>1</sub></i> | 293 | 286 | 1640 | 353 | 2572 | 25.85 | 3.03 | 2.98 |       |      |                       |
| 5.1  | <i>meiMIGS-PPX1-PPX2 F<sub>1</sub></i> | 305 | 303 | 1655 | 357 | 2620 | 26.8  | 2.97 | 2.96 |       |      |                       |
| 5.1  | <i>meiMIGS-PPX1-PPX2 F<sub>1</sub></i> | 278 | 281 | 1586 | 344 | 2489 | 25.78 | 2.98 | 3    |       |      |                       |
| 5.1  | <i>meiMIGS-PPX1-PPX2 F<sub>1</sub></i> | 277 | 297 | 1672 | 369 | 2615 | 25.1  | 2.93 | 3.05 |       |      |                       |
| 5.1  | <i>meiMIGS-PPX1-PPX2 F<sub>1</sub></i> | 313 | 290 | 1728 | 392 | 2723 | 25.36 | 2.99 | 2.86 |       |      |                       |
| 5.1  | <i>meiMIGS-PPX1-PPX2 F<sub>1</sub></i> | 315 | 319 | 1684 | 365 | 2683 | 27.38 | 2.92 | 2.95 |       |      |                       |
| 5.5  | Wild type                              | 379 | 407 | 1842 | 374 | 3002 | 30.98 | 2.84 | 2.99 | 28.8  | 1.84 |                       |
| 5.5  | Wild type                              | 402 | 430 | 2078 | 439 | 3349 | 29.07 | 2.85 | 2.98 |       |      |                       |
| 5.5  | Wild type                              | 366 | 363 | 2040 | 443 | 3212 | 26.1  | 2.99 | 2.97 |       |      |                       |
| 5.5  | Wild type                              | 413 | 412 | 2124 | 433 | 3382 | 28.44 | 3    | 3    |       |      |                       |
| 5.5  | Wild type                              | 408 | 423 | 1922 | 376 | 3129 | 31.53 | 2.92 | 2.99 |       |      |                       |
| 5.5  | Wild type                              | 409 | 419 | 2079 | 428 | 3335 | 29.05 | 2.94 | 2.98 |       |      |                       |
| 5.5  | Wild type                              | 406 | 414 | 2230 | 480 | 3530 | 26.83 | 2.95 | 2.98 |       |      |                       |
| 5.5  | Wild type                              | 401 | 408 | 2077 | 431 | 3317 | 28.43 | 2.95 | 2.99 | 28.52 | 2.39 | 0.625                 |
| 5.5  | <i>meiMIGS-PPX1-PPX2 F<sub>1</sub></i> | 210 | 211 | 1101 | 266 | 1788 | 27.26 | 2.75 | 2.76 |       |      |                       |
| 5.5  | <i>meiMIGS-PPX1-PPX2 F<sub>1</sub></i> | 181 | 195 | 1167 | 304 | 1847 | 23    | 2.7  | 2.81 |       |      |                       |
| 5.5  | <i>meiMIGS-PPX1-PPX2 F<sub>1</sub></i> | 219 | 248 | 1070 | 257 | 1794 | 30.76 | 2.55 | 2.77 |       |      |                       |
| 5.5  | <i>meiMIGS-PPX1-PPX2 F<sub>1</sub></i> | 221 | 204 | 1146 | 249 | 1820 | 27    | 3.02 | 2.87 |       |      |                       |
| 5.5  | <i>meiMIGS-PPX1-PPX2 F<sub>1</sub></i> | 183 | 180 | 1034 | 232 | 1629 | 25.55 | 2.95 | 2.93 |       |      |                       |
| 5.5  | <i>meiMIGS-PPX1-PPX2 F<sub>1</sub></i> | 228 | 251 | 1136 | 283 | 1898 | 29.63 | 2.55 | 2.71 |       |      |                       |
| 5.5  | <i>meiMIGS-PPX1-PPX2 F<sub>1</sub></i> | 329 | 373 | 1576 | 307 | 2585 | 32.41 | 2.8  | 3.06 |       |      |                       |
| 5.5  | <i>meiMIGS-PPX1-PPX2 F<sub>1</sub></i> | 575 | 595 | 1316 | 72  | 2558 | 29.19 | 2.84 | 2.95 |       |      |                       |
| 5.5  | <i>meiMIGS-PPX1-PPX2 F<sub>1</sub></i> | 533 | 526 | 1214 | 34  | 2307 | 28.62 | 3.12 | 3.07 |       |      |                       |
| 5.5  | <i>meiMIGS-PPX1-PPX2 F<sub>1</sub></i> | 233 | 215 | 1180 | 224 | 1852 | 28.15 | 3.22 | 3.05 |       |      |                       |
| 5.5  | <i>meiMIGS-PPX1-PPX2 F<sub>1</sub></i> | 338 | 327 | 1576 | 300 | 2541 | 30.96 | 3.05 | 2.98 |       |      |                       |
| 5.5  | <i>meiMIGS-PPX1-PPX2 F<sub>1</sub></i> | 308 | 322 | 1612 | 338 | 2580 | 28.47 | 2.91 | 2.99 |       |      |                       |
| 5.5  | <i>meiMIGS-PPX1-PPX2 F<sub>1</sub></i> | 309 | 329 | 1454 | 291 | 2383 | 31.84 | 2.84 | 2.97 |       |      |                       |
| 5.5  | <i>meiMIGS-PPX1-PPX2 F<sub>1</sub></i> | 318 | 330 | 1662 | 305 | 2615 | 28.98 | 3.12 | 3.2  |       |      |                       |
| 5.5  | <i>meiMIGS-PPX1-PPX2 F<sub>1</sub></i> | 302 | 289 | 1622 | 319 | 2532 | 26.98 | 3.16 | 3.08 |       |      |                       |
| 5.5  | <i>meiMIGS-PPX1-PPX2 F<sub>1</sub></i> | 318 | 292 | 1644 | 319 | 2573 | 27.48 | 3.21 | 3.04 |       |      |                       |
| 5.13 | Wild type                              | 427 | 424 | 2169 | 431 | 3451 | 28.81 | 3.04 | 3.02 | 29.33 | 0.9  |                       |
| 5.13 | Wild type                              | 380 | 395 | 2055 | 436 | 3266 | 27.51 | 2.93 | 3    |       |      |                       |
| 5.13 | Wild type                              | 421 | 437 | 2135 | 433 | 3426 | 29.35 | 2.94 | 3.01 |       |      |                       |

|      |                                        |     |     |      |     |      |       |      |      |       |      |                       |
|------|----------------------------------------|-----|-----|------|-----|------|-------|------|------|-------|------|-----------------------|
| 5.13 | Wild type                              | 401 | 411 | 2040 | 419 | 3271 | 29.04 | 2.94 | 2.99 |       |      |                       |
| 5.13 | Wild type                              | 419 | 432 | 2054 | 423 | 3328 | 30.1  | 2.89 | 2.95 |       |      |                       |
| 5.13 | Wild type                              | 438 | 435 | 2111 | 410 | 3394 | 30.32 | 3.02 | 3    |       |      |                       |
| 5.13 | Wild type                              | 403 | 412 | 2019 | 411 | 3245 | 29.45 | 2.94 | 2.99 |       |      |                       |
| 5.13 | Wild type                              | 441 | 448 | 2166 | 430 | 3485 | 30.01 | 2.97 | 3    |       |      |                       |
| 5.13 | <i>meiMIGS-PPX1-PPX2 F<sub>1</sub></i> | 213 | 204 | 1001 | 198 | 1616 | 30.44 | 3.02 | 2.93 |       |      |                       |
| 5.13 | <i>meiMIGS-PPX1-PPX2 F<sub>1</sub></i> | 276 | 235 | 1083 | 177 | 1771 | 34.97 | 3.3  | 2.91 |       |      |                       |
| 5.13 | <i>meiMIGS-PPX1-PPX2 F<sub>1</sub></i> | 241 | 215 | 1086 | 187 | 1729 | 31.26 | 3.3  | 3.04 |       |      |                       |
| 5.13 | <i>meiMIGS-PPX1-PPX2 F<sub>1</sub></i> | 216 | 230 | 979  | 184 | 1609 | 33.25 | 2.89 | 3.02 |       |      |                       |
| 5.13 | <i>meiMIGS-PPX1-PPX2 F<sub>1</sub></i> | 274 | 281 | 1131 | 208 | 1894 | 35.66 | 2.87 | 2.93 |       |      |                       |
| 5.13 | <i>meiMIGS-PPX1-PPX2 F<sub>1</sub></i> | 241 | 232 | 1047 | 203 | 1723 | 32.85 | 2.96 | 2.88 |       |      |                       |
| 5.13 | <i>meiMIGS-PPX1-PPX2 F<sub>1</sub></i> | 283 | 288 | 1298 | 249 | 2118 | 32.12 | 2.94 | 2.98 |       |      |                       |
| 5.13 | <i>meiMIGS-PPX1-PPX2 F<sub>1</sub></i> | 237 | 242 | 1186 | 238 | 1903 | 29.53 | 2.96 | 3.01 | 32.33 | 1.76 | 1.87×10 <sup>-5</sup> |
| 5.13 | <i>meiMIGS-PPX1-PPX2 F<sub>1</sub></i> | 237 | 222 | 1089 | 212 | 1760 | 30.83 | 3.06 | 2.92 |       |      |                       |
| 5.13 | <i>meiMIGS-PPX1-PPX2 F<sub>1</sub></i> | 276 | 275 | 1182 | 233 | 1966 | 33.71 | 2.87 | 2.86 |       |      |                       |
| 5.13 | <i>meiMIGS-PPX1-PPX2 F<sub>1</sub></i> | 458 | 476 | 1066 | 60  | 2060 | 30.53 | 2.84 | 2.98 |       |      |                       |
| 5.13 | <i>meiMIGS-PPX1-PPX2 F<sub>1</sub></i> | 252 | 261 | 1166 | 225 | 1904 | 32.09 | 2.92 | 2.99 |       |      |                       |
| 5.13 | <i>meiMIGS-PPX1-PPX2 F<sub>1</sub></i> | 247 | 262 | 1110 | 211 | 1830 | 33.39 | 2.87 | 3    |       |      |                       |
| 5.13 | <i>meiMIGS-PPX1-PPX2 F<sub>1</sub></i> | 237 | 307 | 1197 | 285 | 2026 | 31.96 | 2.42 | 2.88 |       |      |                       |



**Supplementary Table 11. Pollen-based FTL crossover frequency in wild type and *meiMIGS-PPX1-PPX2*.** Pollen-based FTL crossover frequency was measured by DeepTetrad using two or three-color FTL intervals that have two intervals (*i1* and *i2*) with four chromatids (1–4). The 12-tetrad possible classes are no recombination (A), single crossover interval 1 (B; SCO-*i1*), single crossover interval 2 (C; SCO-*i2*), two-strand double crossover (D; 2stDCO), three-strand double crossover a (E; 3st DCOa), three-strand double crossover b (F; 3st DCOb), four-strand double crossover (G; 4st DCO), non-parental ditype interval 1, non-crossover interval 2 (H; NPD-*i1* NCO-*i2*), non-crossover interval 1, non-parental ditype interval 2 (I; NCO-*i1* NPD-*i2*), non-parental ditype interval 1, single crossover interval 2 (J; NPD-*i1* SCO-*i2*), single crossover interval 1, non-parental ditype interval 2 (K; SCO-*i1* NPD-*i2*) and non-parental ditype interval 1, non-parental ditype interval 2 (L; NPD-*i1* NPD-*i2*)<sup>8</sup>. Fluorescent tetrad states were identified using DeepTetrad and crossover frequency (cM) was calculated using the Perkin's equations<sup>9,10</sup>. *P* values were calculated using one-sided Welch's t-tests, which assessed significant differences between wild type and *meiMIGS-PPX1-PPX2* in each pollen-based FTL line<sup>8</sup>.

| Genotype                 | A    | B   | C   | D  | E  | F  | G  | H | I  | J | K | L | Total | <i>l1b</i> cM         | <i>l1c</i> cM         | <i>l1bc</i> cM        |
|--------------------------|------|-----|-----|----|----|----|----|---|----|---|---|---|-------|-----------------------|-----------------------|-----------------------|
| Wild type                | 502  | 142 | 334 | 10 | 3  | 4  | 5  | 0 | 12 | 1 | 1 | 0 | 1014  | 8.43                  | 21.45                 | 28.94                 |
| Wild type                | 662  | 150 | 411 | 11 | 10 | 9  | 6  | 3 | 12 | 0 | 1 | 0 | 1275  | 8.04                  | 20.59                 | 27.73                 |
| Wild type                | 511  | 149 | 341 | 6  | 7  | 5  | 4  | 0 | 11 | 1 | 0 | 0 | 1035  | 8.55                  | 20.77                 | 28.65                 |
| Wild type                | 856  | 205 | 624 | 15 | 8  | 14 | 11 | 3 | 10 | 0 | 0 | 0 | 1746  | 7.76                  | 20.96                 | 28.49                 |
| Wild type                | 683  | 174 | 450 | 7  | 4  | 6  | 14 | 0 | 4  | 0 | 0 | 0 | 1342  | 7.64                  | 18.82                 | 27.65                 |
| Wild type                | 564  | 126 | 369 | 3  | 7  | 6  | 5  | 0 | 3  | 0 | 1 | 0 | 1084  | 6.83                  | 19.1                  | 25.69                 |
| Wild type                | 556  | 168 | 335 | 7  | 1  | 4  | 8  | 3 | 7  | 0 | 3 | 0 | 1092  | 9.57                  | 19                    | 28.34                 |
| Wild type                | 348  | 80  | 234 | 5  | 2  | 3  | 4  | 2 | 3  | 1 | 0 | 0 | 682   | 8.21                  | 19.57                 | 27.42                 |
| Mean                     |      |     |     |    |    |    |    |   |    |   |   |   |       | 8.13                  | 20.03                 | 27.86                 |
| SD                       |      |     |     |    |    |    |    |   |    |   |   |   |       | 0.8                   | 1.03                  | 1.03                  |
| <i>meiMIGS-PPX1-PPX2</i> | 580  | 188 | 463 | 12 | 15 | 12 | 10 | 1 | 11 | 0 | 1 | 0 | 1293  | 9.44                  | 22.58                 | 31.36                 |
| <i>meiMIGS-PPX1-PPX2</i> | 319  | 98  | 301 | 8  | 6  | 10 | 6  | 0 | 8  | 0 | 0 | 0 | 756   | 8.47                  | 25.07                 | 33                    |
| <i>meiMIGS-PPX1-PPX2</i> | 710  | 215 | 570 | 16 | 18 | 9  | 15 | 2 | 11 | 0 | 2 | 0 | 1568  | 9.15                  | 22.51                 | 31.31                 |
| <i>meiMIGS-PPX1-PPX2</i> | 311  | 114 | 266 | 19 | 9  | 16 | 8  | 0 | 7  | 1 | 0 | 0 | 751   | 11.45                 | 24.03                 | 33.02                 |
| <i>meiMIGS-PPX1-PPX2</i> | 266  | 99  | 191 | 19 | 7  | 10 | 6  | 0 | 3  | 1 | 0 | 0 | 602   | 12.21                 | 20.93                 | 30.07                 |
| <i>meiMIGS-PPX1-PPX2</i> | 486  | 151 | 397 | 18 | 16 | 17 | 9  | 1 | 15 | 2 | 2 | 0 | 1114  | 10.37                 | 25.18                 | 32.99                 |
| <i>meiMIGS-PPX1-PPX2</i> | 301  | 113 | 238 | 12 | 14 | 14 | 13 | 1 | 10 | 0 | 2 | 1 | 719   | 12.52                 | 25.66                 | 36.51                 |
| Mean                     |      |     |     |    |    |    |    |   |    |   |   |   |       | 10.51                 | 23.71                 | 32.61                 |
| SD                       |      |     |     |    |    |    |    |   |    |   |   |   |       | 1.58                  | 1.75                  | 2.06                  |
| <i>P</i> value           |      |     |     |    |    |    |    |   |    |   |   |   |       | 3.03×10 <sup>-3</sup> | 3.85×10 <sup>-4</sup> | 2.19×10 <sup>-4</sup> |
| Genotype                 | A    | B   | C   | D  | E  | F  | G  | H | I  | J | K | L | Total | <i>l1f</i> cM         | <i>l1g</i> cM         | <i>l1fg</i> cM        |
| Wild type                | 1060 | 138 | 45  | 1  | 0  | 0  | 1  | 1 | 0  | 0 | 1 | 0 | 1247  | 5.89                  | 2.13                  | 7.86                  |
| Wild type                | 1128 | 174 | 53  | 1  | 0  | 0  | 0  | 1 | 0  | 0 | 0 | 0 | 1357  | 6.67                  | 1.99                  | 8.59                  |
| Wild type                | 556  | 73  | 21  | 1  | 0  | 0  | 0  | 1 | 0  | 0 | 0 | 0 | 652   | 6.13                  | 1.69                  | 7.67                  |
| Wild type                | 772  | 103 | 38  | 1  | 0  | 0  | 0  | 0 | 0  | 0 | 0 | 0 | 914   | 5.69                  | 2.13                  | 7.71                  |
| Wild type                | 868  | 124 | 34  | 1  | 0  | 0  | 1  | 2 | 0  | 0 | 0 | 0 | 1030  | 6.7                   | 1.75                  | 8.54                  |
| Wild type                | 1027 | 163 | 47  | 0  | 0  | 1  | 0  | 0 | 0  | 0 | 0 | 0 | 1238  | 6.62                  | 1.94                  | 8.52                  |
| Wild type                | 900  | 121 | 34  | 3  | 0  | 0  | 0  | 1 | 0  | 0 | 0 | 0 | 1059  | 6.14                  | 1.75                  | 7.6                   |
| Wild type                | 775  | 110 | 31  | 1  | 1  | 0  | 0  | 0 | 0  | 0 | 0 | 0 | 918   | 6.1                   | 1.8                   | 7.73                  |

|                          |      |     |     |    |    |    |    |    |   |   |   |   |       |                       |                       |                       |
|--------------------------|------|-----|-----|----|----|----|----|----|---|---|---|---|-------|-----------------------|-----------------------|-----------------------|
| Wild type                | 556  | 73  | 21  | 1  | 0  | 0  | 0  | 1  | 0 | 0 | 0 | 0 | 652   | 6.13                  | 1.69                  | 7.67                  |
| Mean                     |      |     |     |    |    |    |    |    |   |   |   |   |       | 6.23                  | 1.87                  | 7.99                  |
| SD                       |      |     |     |    |    |    |    |    |   |   |   |   |       | 0.36                  | 0.18                  | 0.43                  |
| <i>meiMIGS-PPX1-PPX2</i> | 1079 | 159 | 52  | 1  | 4  | 1  | 1  | 3  | 0 | 0 | 0 | 0 | 1300  | 7.08                  | 2.27                  | 9.23                  |
| <i>meiMIGS-PPX1-PPX2</i> | 516  | 107 | 22  | 1  | 0  | 0  | 0  | 0  | 0 | 0 | 0 | 0 | 646   | 8.36                  | 1.78                  | 9.98                  |
| <i>meiMIGS-PPX1-PPX2</i> | 1382 | 236 | 53  | 4  | 0  | 2  | 1  | 0  | 0 | 0 | 0 | 0 | 1678  | 7.24                  | 1.79                  | 8.85                  |
| <i>meiMIGS-PPX1-PPX2</i> | 1145 | 173 | 58  | 0  | 2  | 1  | 1  | 0  | 0 | 0 | 0 | 0 | 1381  | 6.41                  | 2.24                  | 8.69                  |
| <i>meiMIGS-PPX1-PPX2</i> | 574  | 80  | 29  | 0  | 1  | 1  | 0  | 1  | 0 | 0 | 0 | 0 | 686   | 6.41                  | 2.26                  | 8.53                  |
| <i>meiMIGS-PPX1-PPX2</i> | 458  | 72  | 19  | 2  | 0  | 0  | 0  | 2  | 0 | 0 | 0 | 0 | 553   | 7.78                  | 1.9                   | 9.31                  |
| <i>meiMIGS-PPX1-PPX2</i> | 942  | 150 | 43  | 1  | 3  | 0  | 1  | 2  | 0 | 0 | 0 | 0 | 1142  | 7.31                  | 2.1                   | 9.37                  |
| <i>meiMIGS-PPX1-PPX2</i> | 929  | 150 | 37  | 0  | 0  | 1  | 0  | 0  | 0 | 0 | 0 | 0 | 1117  | 6.76                  | 1.7                   | 8.42                  |
| Mean                     |      |     |     |    |    |    |    |    |   |   |   |   |       | 7.17                  | 2.01                  | 9.05                  |
| SD                       |      |     |     |    |    |    |    |    |   |   |   |   |       | 0.67                  | 0.24                  | 0.52                  |
| <i>P</i> value           |      |     |     |    |    |    |    |    |   |   |   |   |       | 2.52×10 <sup>-3</sup> | 0.114                 | 2.45×10 <sup>-4</sup> |
| Genotype                 | A    | B   | C   | D  | E  | F  | G  | H  | I | J | K | L | Total | <i>I3b</i> cM         | <i>I3c</i> cM         | <i>I3bc</i> cM        |
| Wild type                | 750  | 431 | 113 | 3  | 6  | 5  | 5  | 8  | 0 | 0 | 0 | 0 | 1321  | 18.85                 | 5                     | 23.96                 |
| Wild type                | 626  | 316 | 82  | 2  | 2  | 3  | 3  | 3  | 0 | 0 | 0 | 0 | 1037  | 16.59                 | 4.44                  | 21.17                 |
| Wild type                | 409  | 207 | 49  | 2  | 1  | 0  | 2  | 4  | 2 | 0 | 0 | 0 | 676   | 17.46                 | 4.88                  | 22.56                 |
| Wild type                | 1136 | 624 | 157 | 5  | 7  | 4  | 12 | 6  | 1 | 0 | 0 | 0 | 1952  | 17.62                 | 4.89                  | 23.21                 |
| Wild type                | 501  | 271 | 54  | 7  | 1  | 1  | 5  | 3  | 0 | 0 | 0 | 0 | 843   | 17.97                 | 4.03                  | 22.24                 |
| Wild type                | 504  | 264 | 57  | 6  | 1  | 5  | 1  | 5  | 0 | 1 | 0 | 0 | 844   | 18.54                 | 4.21                  | 21.56                 |
| Wild type                | 1042 | 559 | 132 | 3  | 4  | 7  | 6  | 10 | 1 | 0 | 0 | 0 | 1764  | 18.11                 | 4.48                  | 22.79                 |
| Wild type                | 378  | 184 | 39  | 1  | 3  | 3  | 0  | 5  | 1 | 0 | 0 | 0 | 614   | 18                    | 4.23                  | 21.58                 |
| Mean                     |      |     |     |    |    |    |    |    |   |   |   |   |       | 17.89                 | 4.52                  | 22.38                 |
| SD                       |      |     |     |    |    |    |    |    |   |   |   |   |       | 0.69                  | 0.36                  | 0.94                  |
| <i>meiMIGS-PPX1-PPX2</i> | 516  | 338 | 101 | 19 | 9  | 7  | 6  | 9  | 2 | 0 | 0 | 0 | 1007  | 21.5                  | 7.65                  | 27.66                 |
| <i>meiMIGS-PPX1-PPX2</i> | 478  | 366 | 88  | 16 | 7  | 7  | 5  | 5  | 0 | 0 | 0 | 0 | 972   | 22.17                 | 6.33                  | 27.16                 |
| <i>meiMIGS-PPX1-PPX2</i> | 448  | 342 | 108 | 11 | 6  | 9  | 3  | 7  | 2 | 1 | 1 | 0 | 938   | 22.39                 | 8.32                  | 28.73                 |
| <i>meiMIGS-PPX1-PPX2</i> | 701  | 580 | 167 | 12 | 9  | 10 | 6  | 18 | 2 | 2 | 1 | 0 | 1508  | 24.47                 | 7.43                  | 30.67                 |
| <i>meiMIGS-PPX1-PPX2</i> | 472  | 309 | 77  | 9  | 6  | 9  | 6  | 6  | 2 | 1 | 2 | 0 | 899   | 21.3                  | 7.34                  | 27.14                 |
| <i>meiMIGS-PPX1-PPX2</i> | 471  | 322 | 94  | 12 | 5  | 8  | 5  | 5  | 1 | 1 | 1 | 0 | 925   | 21.03                 | 7.41                  | 26.86                 |
| <i>meiMIGS-PPX1-PPX2</i> | 548  | 384 | 139 | 11 | 6  | 10 | 5  | 6  | 2 | 1 | 2 | 0 | 1114  | 20.65                 | 8.8                   | 27.83                 |
| Mean                     |      |     |     |    |    |    |    |    |   |   |   |   |       | 21.93                 | 7.61                  | 28.01                 |
| SD                       |      |     |     |    |    |    |    |    |   |   |   |   |       | 1.28                  | 0.79                  | 1.33                  |
| <i>P</i> value           |      |     |     |    |    |    |    |    |   |   |   |   |       | 1.92×10 <sup>-5</sup> | 4.99×10 <sup>-6</sup> | 9.08×10 <sup>-7</sup> |
| Genotype                 | A    | B   | C   | D  | E  | F  | G  | H  | I | J | K | L | Total | <i>I5a</i> cM         | <i>I5b</i> cM         | <i>I5ab</i> cM        |
| Wild type                | 256  | 213 | 108 | 8  | 8  | 13 | 8  | 6  | 1 | 0 | 0 | 0 | 621   | 23.03                 | 12.16                 | 34.78                 |
| Wild type                | 235  | 220 | 137 | 9  | 12 | 6  | 9  | 4  | 0 | 0 | 1 | 0 | 633   | 22.2                  | 14.14                 | 35.86                 |
| Wild type                | 320  | 303 | 159 | 13 | 6  | 8  | 10 | 4  | 3 | 0 | 1 | 0 | 827   | 22.07                 | 13.3                  | 35.01                 |
| Wild type                | 273  | 240 | 133 | 6  | 15 | 6  | 11 | 2  | 1 | 3 | 0 | 0 | 690   | 22.32                 | 13.04                 | 34.86                 |
| Wild type                | 254  | 214 | 109 | 8  | 8  | 13 | 8  | 6  | 1 | 0 | 0 | 0 | 621   | 23.11                 | 12.24                 | 34.94                 |
| Wild type                | 249  | 234 | 164 | 11 | 3  | 5  | 6  | 5  | 1 | 2 | 0 | 0 | 680   | 22.13                 | 14.49                 | 35.29                 |

|                          |     |     |     |    |    |    |    |    |   |    |   |   |      |                       |                       |                       |
|--------------------------|-----|-----|-----|----|----|----|----|----|---|----|---|---|------|-----------------------|-----------------------|-----------------------|
| Wild type                | 470 | 434 | 250 | 16 | 15 | 16 | 12 | 11 | 2 | 1  | 2 | 0 | 1229 | 23.07                 | 13.59                 | 35.31                 |
| Wild type                | 202 | 205 | 119 | 5  | 4  | 6  | 4  | 7  | 0 | 0  | 0 | 0 | 552  | 24.09                 | 12.5                  | 36.23                 |
| Wild type                | 339 | 345 | 202 | 8  | 11 | 11 | 9  | 5  | 2 | 1  | 1 | 0 | 934  | 22.54                 | 13.92                 | 35.71                 |
| Mean                     |     |     |     |    |    |    |    |    |   |    |   |   |      | 22.73                 | 13.26                 | 35.33                 |
| SD                       |     |     |     |    |    |    |    |    |   |    |   |   |      | 0.66                  | 0.84                  | 0.5                   |
| <i>meiMIGS-PPX1-PPX2</i> | 366 | 369 | 224 | 40 | 36 | 32 | 23 | 12 | 7 | 4  | 4 | 0 | 1117 | 26.86                 | 19.02                 | 41.23                 |
| <i>meiMIGS-PPX1-PPX2</i> | 287 | 289 | 159 | 19 | 25 | 27 | 27 | 10 | 3 | 3  | 3 | 0 | 852  | 27.46                 | 17.37                 | 43.78                 |
| <i>meiMIGS-PPX1-PPX2</i> | 260 | 246 | 118 | 24 | 25 | 20 | 20 | 12 | 0 | 6  | 0 | 0 | 731  | 30.3                  | 14.57                 | 41.52                 |
| <i>meiMIGS-PPX1-PPX2</i> | 312 | 243 | 150 | 22 | 21 | 22 | 29 | 5  | 4 | 2  | 0 | 0 | 810  | 23.4                  | 16.67                 | 41.11                 |
| <i>meiMIGS-PPX1-PPX2</i> | 307 | 363 | 224 | 25 | 38 | 46 | 37 | 13 | 2 | 4  | 1 | 0 | 1060 | 28.87                 | 18.49                 | 46.6                  |
| <i>meiMIGS-PPX1-PPX2</i> | 368 | 484 | 267 | 69 | 41 | 43 | 35 | 22 | 6 | 10 | 2 | 0 | 1347 | 32.15                 | 19.04                 | 45.47                 |
| <i>meiMIGS-PPX1-PPX2</i> | 280 | 290 | 166 | 33 | 22 | 27 | 23 | 19 | 4 | 8  | 0 | 0 | 872  | 31.94                 | 17.37                 | 45.24                 |
| Mean                     |     |     |     |    |    |    |    |    |   |    |   |   |      | 28.71                 | 17.51                 | 43.56                 |
| SD                       |     |     |     |    |    |    |    |    |   |    |   |   |      | 3.11                  | 1.58                  | 2.29                  |
| <i>P</i> value           |     |     |     |    |    |    |    |    |   |    |   |   |      | $1.00 \times 10^{-3}$ | $7.28 \times 10^{-5}$ | $2.75 \times 10^{-5}$ |

**Supplementary Table 12. *CEN3* crossover frequency in wild type and *meiMIGS-PPX1-PPX2*.** Pollen-based FTL *CEN3* crossover frequency is measured by DeepTetrad using two FTL intervals. Two color-FTL interval (*CEN3*) produces parental ditype (PD), tetra type (T), and non-parental ditype (NPD) tetrads. Fluorescent tetrad states were identified using DeepTetrad and crossover frequency (cM) was calculated using the Perkin's equations<sup>9,10</sup>. The *P* value was calculated using a one-sided Welch's t-test, which assessed significant differences between wild type and *meiMIGS-PPX1-PPX2*<sup>8</sup>.

| Genotype                 | NPD | T   | Total | <i>CEN3</i> cM        |
|--------------------------|-----|-----|-------|-----------------------|
| Wild type                | 2   | 326 | 1282  | 13.18                 |
| Wild type                | 6   | 287 | 1297  | 12.45                 |
| Wild type                | 5   | 173 | 782   | 12.98                 |
| Wild type                | 2   | 157 | 741   | 11.40                 |
| Wild type                | 4   | 317 | 1340  | 12.72                 |
| Wild type                | 1   | 185 | 754   | 12.67                 |
| Wild type                | 4   | 355 | 1465  | 12.94                 |
| Wild type                | 0   | 276 | 1056  | 13.07                 |
| Wild type                | 2   | 198 | 875   | 12.00                 |
| Mean                     |     |     |       | 12.60                 |
| SD                       |     |     |       | 0.58                  |
| <i>meiMIGS-PPX1-PPX2</i> | 9   | 488 | 2202  | 12.31                 |
| <i>meiMIGS-PPX1-PPX2</i> | 6   | 298 | 1995  | 8.37                  |
| <i>meiMIGS-PPX1-PPX2</i> | 10  | 513 | 2306  | 12.42                 |
| <i>meiMIGS-PPX1-PPX2</i> | 7   | 446 | 2261  | 10.79                 |
| <i>meiMIGS-PPX1-PPX2</i> | 9   | 456 | 2203  | 11.58                 |
| <i>meiMIGS-PPX1-PPX2</i> | 7   | 495 | 2316  | 11.59                 |
| <i>meiMIGS-PPX1-PPX2</i> | 4   | 223 | 1183  | 10.44                 |
| <i>meiMIGS-PPX1-PPX2</i> | 7   | 339 | 1829  | 10.42                 |
| Mean                     |     |     |       | 10.99                 |
| SD                       |     |     |       | 1.31                  |
| <i>P</i> value           |     |     |       | $4.53 \times 10^{-3}$ |

**Supplementary Table 13. 420 crossover frequency of male and female meiosis in wild type, *hcr1-1* and *meiMIGS-PPX1-PPX2*.** 420 crossover frequency was measured by analyzing counts of fluorescence and non-fluorescent seeds from 420/++ hemizygote plants, using CellProfiler<sup>1,2</sup>. Genetic distances of 420 male and female meiosis were separately measured by reciprocally crossing wild type, *hcr1-1* and *meiMIGS-PPX1-PPX2* of 420 hemizygote plants with wild type plants. CellProfiler determines the numbers of green-alone fluorescent seeds ( $N_{\text{Green}}$ ), red-alone fluorescent seeds ( $N_{\text{Red}}$ ) and total seeds ( $N_{\text{Total}}$ ). Crossover frequency (cM) is calculated using the formula:  $\text{cM} = 100 \times (N_{\text{Green}} + N_{\text{Red}}) / N_{\text{Total}}$ . *P* values were calculated using one-sided Welch's t-tests, which assessed significant differences between wild type, *hcr1-1* and *meiMIGS-PPX1-PPX2*<sup>7</sup>.

| Genotype                        | Green | Red | Both | None | Total | cM    | G/nG | R/nR | Mean  | SD   | <i>P</i> value        |
|---------------------------------|-------|-----|------|------|-------|-------|------|------|-------|------|-----------------------|
| Col male                        | 93    | 89  | 278  | 329  | 789   | 23.07 | 0.89 | 0.87 | 24.23 | 1.68 |                       |
| Col male                        | 76    | 60  | 201  | 236  | 573   | 23.73 | 0.94 | 0.84 |       |      |                       |
| Col male                        | 51    | 50  | 143  | 142  | 386   | 26.17 | 1.01 | 1.00 |       |      |                       |
| Col male                        | 122   | 125 | 348  | 362  | 957   | 25.81 | 0.98 | 0.97 |       |      |                       |
| Col male                        | 71    | 82  | 265  | 266  | 684   | 22.37 | 0.97 | 1.03 |       |      |                       |
| <i>hcr1-1</i> male              | 94    | 110 | 73   | 64   | 341   | 40.18 | 0.96 | 1.16 | 41.69 | 2.20 | $6.25 \times 10^{-7}$ |
| <i>hcr1-1</i> male              | 207   | 209 | 124  | 140  | 680   | 38.82 | 0.95 | 0.96 |       |      |                       |
| <i>hcr1-1</i> male              | 138   | 181 | 185  | 214  | 718   | 44.43 | 0.82 | 1.04 |       |      |                       |
| <i>hcr1-1</i> male              | 281   | 287 | 375  | 391  | 1334  | 42.58 | 0.99 | 0.97 |       |      |                       |
| <i>hcr1-1</i> male              | 215   | 218 | 279  | 308  | 1020  | 42.45 | 0.94 | 0.95 |       |      |                       |
| <i>meiMIGS-PPX1-PPX2</i> male   | 126   | 152 | 247  | 274  | 799   | 34.79 | 0.88 | 1.00 | 36.93 | 1.66 | $2.15 \times 10^{-7}$ |
| <i>meiMIGS-PPX1-PPX2</i> male   | 216   | 213 | 374  | 348  | 1151  | 37.27 | 1.05 | 1.04 |       |      |                       |
| <i>meiMIGS-PPX1-PPX2</i> male   | 210   | 242 | 377  | 318  | 1147  | 39.41 | 1.05 | 1.17 |       |      |                       |
| <i>meiMIGS-PPX1-PPX2</i> male   | 183   | 181 | 301  | 330  | 995   | 36.58 | 0.94 | 0.95 |       |      |                       |
| <i>meiMIGS-PPX1-PPX2</i> male   | 167   | 194 | 297  | 329  | 987   | 36.58 | 0.89 | 0.99 |       |      |                       |
| Col female                      | 32    | 38  | 304  | 334  | 708   | 9.89  | 0.93 | 0.90 | 10.98 | 1.94 |                       |
| Col female                      | 35    | 41  | 315  | 276  | 667   | 11.39 | 1.14 | 1.10 |       |      |                       |
| Col female                      | 56    | 30  | 329  | 281  | 696   | 12.36 | 1.07 | 1.24 |       |      |                       |
| Col female                      | 37    | 31  | 391  | 367  | 826   | 8.23  | 1.04 | 1.08 |       |      |                       |
| Col female                      | 69    | 58  | 420  | 426  | 973   | 13.05 | 0.97 | 1.01 |       |      |                       |
| <i>hcr1-1</i> female            | 50    | 39  | 231  | 253  | 573   | 15.53 | 0.89 | 0.96 | 15.79 | 1.29 | $2.81 \times 10^{-3}$ |
| <i>hcr1-1</i> female            | 50    | 65  | 285  | 276  | 676   | 17.01 | 1.07 | 0.98 |       |      |                       |
| <i>hcr1-1</i> female            | 36    | 47  | 250  | 274  | 607   | 13.67 | 0.96 | 0.89 |       |      |                       |
| <i>hcr1-1</i> female            | 72    | 67  | 358  | 351  | 848   | 16.39 | 1.00 | 1.03 |       |      |                       |
| <i>hcr1-1</i> female            | 80    | 71  | 392  | 381  | 924   | 16.34 | 1.00 | 1.04 |       |      |                       |
| <i>meiMIGS-PPX1-PPX2</i> female | 29    | 42  | 169  | 170  | 410   | 17.32 | 1.06 | 0.93 | 17.22 | 2.65 | $1.75 \times 10^{-3}$ |
| <i>meiMIGS-PPX1-PPX2</i> female | 54    | 47  | 306  | 262  | 669   | 15.10 | 1.12 | 1.17 |       |      |                       |
| <i>meiMIGS-PPX1-PPX2</i> female | 46    | 55  | 307  | 303  | 711   | 14.21 | 1.04 | 0.99 |       |      |                       |
| <i>meiMIGS-PPX1-PPX2</i> female | 45    | 54  | 234  | 193  | 526   | 18.82 | 1.21 | 1.13 |       |      |                       |
| <i>meiMIGS-PPX1-PPX2</i> female | 56    | 59  | 243  | 198  | 556   | 20.68 | 1.19 | 1.16 |       |      |                       |

**Supplementary Table 14. Crossover interference measurements in wild type, *meiMIGS-PPX1-PPX2* and *hcr1* mutants.** DeepTetrad, a deep learning based tetrad analyzer, was used with three-color FTL interval pollen (*I1bc*, *Ifg*, *I3bc*, *I5ab*) to measure crossover frequency (cM) and interference ratio (IFR) in two linked intervals<sup>8,9</sup>. Crossover interference ratio (IFR) is the ratio of the map distance with adjacent crossover (*w\_adj\_CO*) to the map distance without adjacent crossover (*w/o\_adj\_CO*). *P* values were calculated using Welch's t-tests, to assess significance between wild type and genotypes.

| Genotype          | Col   | Col   | Col   | Col   | Mean  | SD   | <i>meiMIGS-PPX1-PPX2</i> | <i>meiMIGS-PPX1-PPX2</i> | <i>meiMIGS-PPX1-PPX2</i> | <i>meiMIGS-PPX1-PPX2</i> | Mean  | SD   | <i>P</i>                  |                           |                           |                           |                           |                           |                           |                           |                           |                           |                           |                           |                           |                           |                           |                           |
|-------------------|-------|-------|-------|-------|-------|------|--------------------------|--------------------------|--------------------------|--------------------------|-------|------|---------------------------|---------------------------|---------------------------|---------------------------|---------------------------|---------------------------|---------------------------|---------------------------|---------------------------|---------------------------|---------------------------|---------------------------|---------------------------|---------------------------|---------------------------|---------------------------|
| A                 | 1013  | 1204  | 1218  | 1247  |       |      | 846                      | 620                      | 1021                     | 486                      |       |      | 3.05<br>×10 <sup>-3</sup> |                           |                           |                           |                           |                           |                           |                           |                           |                           |                           |                           |                           |                           |                           |                           |
| B                 | 291   | 285   | 318   | 300   |       |      | 287                      | 211                      | 329                      | 151                      |       |      |                           | 3.05<br>×10 <sup>-3</sup> |                           |                           |                           |                           |                           |                           |                           |                           |                           |                           |                           |                           |                           |                           |
| C                 | 675   | 858   | 746   | 819   |       |      | 654                      | 539                      | 836                      | 397                      |       |      |                           |                           | 3.05<br>×10 <sup>-3</sup> |                           |                           |                           |                           |                           |                           |                           |                           |                           |                           |                           |                           |                           |
| D                 | 16    | 20    | 18    | 10    |       |      | 31                       | 20                       | 35                       | 18                       |       |      |                           |                           |                           | 3.05<br>×10 <sup>-3</sup> |                           |                           |                           |                           |                           |                           |                           |                           |                           |                           |                           |                           |
| E                 | 10    | 10    | 11    | 11    |       |      | 22                       | 20                       | 27                       | 16                       |       |      |                           |                           |                           |                           | 3.05<br>×10 <sup>-3</sup> |                           |                           |                           |                           |                           |                           |                           |                           |                           |                           |                           |
| F                 | 9     | 17    | 13    | 12    |       |      | 22                       | 24                       | 25                       | 17                       |       |      |                           |                           |                           |                           |                           | 3.05<br>×10 <sup>-3</sup> |                           |                           |                           |                           |                           |                           |                           |                           |                           |                           |
| G                 | 9     | 15    | 14    | 19    |       |      | 16                       | 19                       | 23                       | 9                        |       |      |                           |                           |                           |                           |                           |                           | 3.05<br>×10 <sup>-3</sup> |                           |                           |                           |                           |                           |                           |                           |                           |                           |
| H                 | 0     | 5     | 6     | 0     |       |      | 1                        | 1                        | 2                        | 1                        |       |      |                           |                           |                           |                           |                           |                           |                           | 3.05<br>×10 <sup>-3</sup> |                           |                           |                           |                           |                           |                           |                           |                           |
| I                 | 23    | 13    | 19    | 7     |       |      | 14                       | 18                       | 18                       | 15                       |       |      |                           |                           |                           |                           |                           |                           |                           |                           | 3.05<br>×10 <sup>-3</sup> |                           |                           |                           |                           |                           |                           |                           |
| J                 | 2     | 1     | 0     | 0     |       |      | 1                        | 0                        | 1                        | 2                        |       |      |                           |                           |                           |                           |                           |                           |                           |                           |                           | 3.05<br>×10 <sup>-3</sup> |                           |                           |                           |                           |                           |                           |
| K                 | 1     | 0     | 4     | 1     |       |      | 1                        | 2                        | 2                        | 2                        |       |      |                           |                           |                           |                           |                           |                           |                           |                           |                           |                           | 3.05<br>×10 <sup>-3</sup> |                           |                           |                           |                           |                           |
| L                 | 0     | 0     | 0     | 0     |       |      | 0                        | 1                        | 0                        | 0                        |       |      |                           |                           |                           |                           |                           |                           |                           |                           |                           |                           |                           | 3.05<br>×10 <sup>-3</sup> |                           |                           |                           |                           |
| Total             | 2049  | 2428  | 2367  | 2426  |       |      | 1895                     | 1475                     | 2319                     | 1114                     |       |      |                           |                           |                           |                           |                           |                           |                           |                           |                           |                           |                           |                           | 3.05<br>×10 <sup>-3</sup> |                           |                           |                           |
| <i>I1b</i> (cM)   | 8.49  | 7.89  | 8.75  | 7.28  | 8.10  | 0.66 | 10.32                    | 10.44                    | 9.90                     | 10.37                    | 10.26 | 0.24 |                           |                           |                           |                           |                           |                           |                           |                           |                           |                           |                           |                           |                           | 3.05<br>×10 <sup>-3</sup> |                           |                           |
| <i>I1c</i> (cM)   | 21.11 | 20.57 | 19.86 | 18.94 | 20.12 | 0.94 | 22.06                    | 25.36                    | 23.01                    | 25.18                    | 23.90 | 1.63 |                           |                           |                           |                           |                           |                           |                           |                           |                           |                           |                           |                           |                           |                           | 3.05<br>×10 <sup>-3</sup> |                           |
| <i>I1bc</i> (cM)  | 28.79 | 28.19 | 28.01 | 26.77 | 27.94 | 0.85 | 30.95                    | 34.71                    | 31.87                    | 32.99                    | 32.63 | 1.62 |                           |                           |                           |                           |                           |                           |                           |                           |                           |                           |                           |                           |                           |                           |                           | 3.05<br>×10 <sup>-3</sup> |
| <i>w/o_adj_CO</i> | 0.11  | 0.11  | 0.11  | 0.10  | 0.11  | 0.01 | 0.13                     | 0.13                     | 0.13                     | 0.12                     | 0.13  | 0.00 |                           |                           |                           |                           |                           |                           |                           |                           |                           |                           |                           |                           |                           |                           |                           |                           |
| <i>w_adj_CO</i>   | 0.04  | 0.04  | 0.04  | 0.03  | 0.04  | 0.00 | 0.06                     | 0.07                     | 0.06                     | 0.08                     | 0.07  | 0.01 | 3.05<br>×10 <sup>-3</sup> |                           |                           |                           |                           |                           |                           |                           |                           |                           |                           |                           |                           |                           |                           |                           |
| IFR               | 0.34  | 0.35  | 0.32  | 0.31  | 0.33  | 0.02 | 0.50                     | 0.54                     | 0.48                     | 0.63                     | 0.54  | 0.07 |                           | 3.05<br>×10 <sup>-3</sup> |                           |                           |                           |                           |                           |                           |                           |                           |                           |                           |                           |                           |                           |                           |
| Genotype          | Col   | Col   | Col   | Col   | Mean  | SD   | <i>meiMIGS-PPX1-PPX2</i> | <i>meiMIGS-PPX1-PPX2</i> | <i>meiMIGS-PPX1-PPX2</i> | <i>meiMIGS-PPX1-PPX2</i> | Mean  | SD   |                           |                           | <i>P</i>                  |                           |                           |                           |                           |                           |                           |                           |                           |                           |                           |                           |                           |                           |
| A                 | 2188  | 1672  | 1980  | 1802  |       |      | 1595                     | 2311                     | 1032                     | 2087                     |       |      |                           |                           | 1.1<br>×10 <sup>-3</sup>  |                           |                           |                           |                           |                           |                           |                           |                           |                           |                           |                           |                           |                           |
| B                 | 312   | 224   | 270   | 273   |       |      | 266                      | 386                      | 152                      | 323                      |       |      |                           |                           |                           | 1.1<br>×10 <sup>-3</sup>  |                           |                           |                           |                           |                           |                           |                           |                           |                           |                           |                           |                           |
| C                 | 98    | 72    | 76    | 78    |       |      | 74                       | 90                       | 48                       | 101                      |       |      |                           |                           |                           |                           | 1.1<br>×10 <sup>-3</sup>  |                           |                           |                           |                           |                           |                           |                           |                           |                           |                           |                           |
| D                 | 2     | 4     | 3     | 1     |       |      | 2                        | 4                        | 2                        | 1                        |       |      |                           |                           |                           |                           |                           | 1.1<br>×10 <sup>-3</sup>  |                           |                           |                           |                           |                           |                           |                           |                           |                           |                           |
| E                 | 0     | 0     | 0     | 1     |       |      | 4                        | 0                        | 1                        | 5                        |       |      |                           |                           |                           |                           |                           |                           | 1.1<br>×10 <sup>-3</sup>  |                           |                           |                           |                           |                           |                           |                           |                           |                           |
| F                 | 0     | 0     | 0     | 1     |       |      | 1                        | 3                        | 1                        | 1                        |       |      |                           |                           |                           |                           |                           |                           |                           | 1.1<br>×10 <sup>-3</sup>  |                           |                           |                           |                           |                           |                           |                           |                           |
| G                 | 1     | 0     | 1     | 0     |       |      | 1                        | 1                        | 0                        | 2                        |       |      |                           |                           |                           |                           |                           |                           |                           |                           | 1.1<br>×10 <sup>-3</sup>  |                           |                           |                           |                           |                           |                           |                           |
| H                 | 2     | 1     | 4     | 0     |       |      | 3                        | 0                        | 3                        | 2                        |       |      |                           |                           |                           |                           |                           |                           |                           |                           |                           | 1.1<br>×10 <sup>-3</sup>  |                           |                           |                           |                           |                           |                           |
| I                 | 0     | 0     | 0     | 0     |       |      | 0                        | 0                        | 0                        | 0                        |       |      |                           |                           |                           |                           |                           |                           |                           |                           |                           |                           | 1.1<br>×10 <sup>-3</sup>  |                           |                           |                           |                           |                           |
| J                 | 0     | 0     | 0     | 0     |       |      | 0                        | 0                        | 0                        | 0                        |       |      |                           |                           |                           |                           |                           |                           |                           |                           |                           |                           |                           | 1.1<br>×10 <sup>-3</sup>  |                           |                           |                           |                           |
| K                 | 1     | 0     | 0     | 0     |       |      | 0                        | 0                        | 0                        | 0                        |       |      |                           |                           |                           |                           |                           |                           |                           |                           |                           |                           |                           |                           | 1.1<br>×10 <sup>-3</sup>  |                           |                           |                           |
| L                 | 0     | 0     | 0     | 0     |       |      | 0                        | 0                        | 0                        | 0                        |       |      |                           |                           |                           |                           |                           |                           |                           |                           |                           |                           |                           |                           |                           | 1.1<br>×10 <sup>-3</sup>  |                           |                           |
| Total             | 2604  | 1973  | 2334  | 2156  |       |      | 1946                     | 2795                     | 1239                     | 2523                     |       |      |                           |                           |                           |                           |                           |                           |                           |                           |                           |                           |                           |                           |                           |                           | 1.1<br>×10 <sup>-3</sup>  |                           |
| <i>I1f</i> (cM)   | 6.3   | 5.93  | 6.38  | 6.4   | 6.25  | 0.22 | 7.5                      | 7.05                     | 7.02                     | 6.82                     | 7.1   | 0.29 |                           |                           |                           |                           |                           |                           |                           |                           |                           |                           |                           |                           |                           |                           |                           | 1.1<br>×10 <sup>-3</sup>  |
| <i>I1g</i> (cM)   | 2.05  | 1.93  | 1.71  | 1.88  | 1.89  | 0.14 | 2.11                     | 1.75                     | 2.1                      | 2.18                     | 2.03  | 0.19 | 1.1<br>×10 <sup>-3</sup>  |                           |                           |                           |                           |                           |                           |                           |                           |                           |                           |                           |                           |                           |                           |                           |
| <i>I1fg</i> (cM)  | 8.24  | 7.65  | 8.05  | 8.19  | 8.03  | 0.27 | 9.48                     | 8.68                     | 8.88                     | 9                        | 9.01  | 0.34 |                           | 1.1<br>×10 <sup>-3</sup>  |                           |                           |                           |                           |                           |                           |                           |                           |                           |                           |                           |                           |                           |                           |
| <i>w/o_adj_CO</i> | 0.06  | 0.06  | 0.07  | 0.07  | 0.07  | 0.01 | 0.08                     | 0.07                     | 0.07                     | 0.07                     | 0.07  | 0.01 |                           |                           |                           |                           |                           |                           |                           |                           |                           |                           |                           |                           |                           |                           |                           |                           |
| <i>w_adj_CO</i>   | 0.02  | 0.03  | 0.03  | 0.02  | 0.03  | 0.01 | 0.05                     | 0.04                     | 0.04                     | 0.04                     | 0.04  | 0    |                           |                           | 1.1<br>×10 <sup>-3</sup>  |                           |                           |                           |                           |                           |                           |                           |                           |                           |                           |                           |                           |                           |
| IFR               | 0.3   | 0.43  | 0.38  | 0.28  | 0.35  | 0.07 | 0.64                     | 0.57                     | 0.54                     | 0.59                     | 0.58  | 0.04 |                           |                           |                           | 1.1<br>×10 <sup>-3</sup>  |                           |                           |                           |                           |                           |                           |                           |                           |                           |                           |                           |                           |
| Genotype          | Col   | Col   | Col   | Col   | Mean  | SD   | <i>meiMIGS-PPX1-PPX2</i> | <i>meiMIGS-PPX1-PPX2</i> | <i>meiMIGS-PPX1-PPX2</i> | <i>meiMIGS-PPX1-PPX2</i> | Mean  | SD   |                           |                           |                           |                           | <i>P</i>                  |                           |                           |                           |                           |                           |                           |                           |                           |                           |                           |                           |
| A                 | 1545  | 1254  | 1127  | 1420  |       |      | 964                      | 1173                     | 1019                     | 478                      |       |      |                           |                           |                           |                           |                           |                           |                           |                           |                           |                           |                           |                           |                           |                           |                           |                           |
| B                 | 831   | 695   | 587   | 743   |       |      | 680                      | 889                      | 706                      | 366                      |       |      |                           |                           |                           |                           |                           |                           |                           |                           |                           |                           |                           |                           |                           |                           |                           |                           |

|                           |       |       |       |       |       |      |                          |                          |                          |                          |       |      |  |          |
|---------------------------|-------|-------|-------|-------|-------|------|--------------------------|--------------------------|--------------------------|--------------------------|-------|------|--|----------|
| C                         | 206   | 170   | 136   | 171   |       |      | 209                      | 244                      | 233                      | 88                       |       |      |  |          |
| D                         | 7     | 9     | 9     | 4     |       |      | 30                       | 21                       | 23                       | 16                       |       |      |  |          |
| E                         | 8     | 7     | 3     | 7     |       |      | 15                       | 15                       | 11                       | 7                        |       |      |  |          |
| F                         | 4     | 10    | 4     | 10    |       |      | 16                       | 19                       | 18                       | 7                        |       |      |  |          |
| G                         | 14    | 6     | 8     | 6     |       |      | 9                        | 12                       | 10                       | 5                        |       |      |  |          |
| H                         | 10    | 13    | 6     | 15    |       |      | 16                       | 24                       | 11                       | 5                        |       |      |  |          |
| I                         | 3     | 0     | 0     | 2     |       |      | 4                        | 4                        | 3                        | 0                        |       |      |  |          |
| J                         | 0     | 1     | 0     | 0     |       |      | 1                        | 3                        | 2                        | 0                        |       |      |  |          |
| K                         | 0     | 0     | 0     | 0     |       |      | 1                        | 3                        | 3                        | 0                        |       |      |  |          |
| L                         | 0     | 0     | 0     | 0     |       |      | 0                        | 0                        | 0                        | 0                        |       |      |  |          |
| Total                     | 2628  | 2165  | 1880  | 2378  |       |      | 1945                     | 2407                     | 2039                     | 972                      |       |      |  |          |
| <i>I3b</i> (cM)           | 17.58 | 18.73 | 17.21 | 18.08 | 17.9  | 0.66 | 21.93                    | 23.29                    | 20.82                    | 22.17                    | 22.05 | 1.01 |  |          |
| <i>I3c</i> (cM)           | 4.89  | 4.69  | 4.26  | 4.42  | 4.57  | 0.28 | 7.97                     | 7.4                      | 8.17                     | 6.33                     | 7.47  | 0.82 |  |          |
| <i>I3bc</i> (cM)          | 23.04 | 23.03 | 21.65 | 22.48 | 22.55 | 0.65 | 28.17                    | 29.35                    | 27.39                    | 27.16                    | 28.02 | 0.99 |  |          |
| w/o_adj_CO                | 0.19  | 0.2   | 0.18  | 0.19  | 0.19  | 0.01 | 0.23                     | 0.25                     | 0.22                     | 0.23                     | 0.23  | 0.01 |  |          |
| w_adj_CO                  | 0.07  | 0.09  | 0.08  | 0.07  | 0.08  | 0.01 | 0.14                     | 0.14                     | 0.13                     | 0.14                     | 0.14  | 0.01 |  |          |
| IFR                       | 0.37  | 0.48  | 0.41  | 0.35  | 0.4   | 0.06 | 0.58                     | 0.55                     | 0.57                     | 0.61                     | 0.58  | 0.02 |  |          |
| 2.3<br>×10 <sup>-3</sup>  |       |       |       |       |       |      |                          |                          |                          |                          |       |      |  |          |
| Genotype                  | Col   | Col   | Col   | Col   | Mean  | SD   | <i>meiMIGS-PPX1-PPX2</i> | <i>meiMIGS-PPX1-PPX2</i> | <i>meiMIGS-PPX1-PPX2</i> | <i>meiMIGS-PPX1-PPX2</i> | Mean  | SD   |  | <i>P</i> |
| A                         | 576   | 593   | 484   | 945   |       |      | 599                      | 567                      | 648                      | 366                      |       |      |  |          |
| B                         | 516   | 559   | 454   | 879   |       |      | 532                      | 609                      | 774                      | 369                      |       |      |  |          |
| C                         | 267   | 311   | 301   | 502   |       |      | 309                      | 342                      | 433                      | 224                      |       |      |  |          |
| D                         | 21    | 16    | 20    | 27    |       |      | 41                       | 49                       | 102                      | 40                       |       |      |  |          |
| E                         | 14    | 19    | 15    | 34    |       |      | 46                       | 63                       | 63                       | 36                       |       |      |  |          |
| F                         | 21    | 24    | 11    | 28    |       |      | 49                       | 66                       | 70                       | 32                       |       |      |  |          |
| G                         | 18    | 17    | 15    | 27    |       |      | 56                       | 57                       | 58                       | 23                       |       |      |  |          |
| H                         | 10    | 11    | 9     | 20    |       |      | 15                       | 25                       | 41                       | 12                       |       |      |  |          |
| I                         | 4     | 3     | 1     | 3     |       |      | 7                        | 2                        | 10                       | 7                        |       |      |  |          |
| J                         | 0     | 1     | 2     | 4     |       |      | 5                        | 10                       | 18                       | 4                        |       |      |  |          |
| K                         | 1     | 1     | 1     | 2     |       |      | 3                        | 1                        | 2                        | 4                        |       |      |  |          |
| L                         | 0     | 0     | 0     | 0     |       |      | 0                        | 0                        | 0                        | 0                        |       |      |  |          |
| Total                     | 1448  | 1555  | 1313  | 2471  |       |      | 1662                     | 1791                     | 2219                     | 1117                     |       |      |  |          |
| <i>I5a</i> (cM)           | 22.48 | 22.77 | 22.16 | 23.09 | 22.62 | 0.4  | 25.48                    | 29.45                    | 32.06                    | 26.86                    | 28.46 | 2.91 |  |          |
| <i>I5b</i> (cM)           | 12.81 | 13.25 | 14.32 | 13.19 | 13.39 | 0.65 | 17.03                    | 16.89                    | 18.39                    | 19.02                    | 17.83 | 1.04 |  |          |
| <i>I5ab</i> (cM)          | 34.91 | 35.4  | 35.57 | 35.39 | 35.32 | 0.28 | 42.48                    | 44.53                    | 45.38                    | 41.23                    | 43.4  | 1.89 |  |          |
| w/o_adj_CO                | 0.26  | 0.27  | 0.27  | 0.27  | 0.27  | 0.01 | 0.27                     | 0.32                     | 0.35                     | 0.3                      | 0.31  | 0.03 |  |          |
| w_adj_CO                  | 0.11  | 0.11  | 0.1   | 0.11  | 0.11  | 0.01 | 0.22                     | 0.25                     | 0.27                     | 0.21                     | 0.24  | 0.03 |  |          |
| IFR                       | 0.41  | 0.39  | 0.38  | 0.42  | 0.4   | 0.02 | 0.8                      | 0.79                     | 0.76                     | 0.73                     | 0.77  | 0.03 |  |          |
| 3.9<br>×10 <sup>-6</sup>  |       |       |       |       |       |      |                          |                          |                          |                          |       |      |  |          |
| Genotype                  | Col   | Col   | Col   | Col   | Mean  | SD   | <i>hcr1-1</i>            | <i>hcr1-1</i>            | <i>hcr1-1</i>            | <i>hcr1-1</i>            | Mean  | SD   |  | <i>P</i> |
| A                         | 731   | 570   | 528   | 893   |       |      | 441                      | 435                      | 392                      | 521                      |       |      |  |          |
| B                         | 180   | 138   | 115   | 258   |       |      | 154                      | 152                      | 134                      | 171                      |       |      |  |          |
| C                         | 439   | 364   | 356   | 615   |       |      | 338                      | 411                      | 314                      | 404                      |       |      |  |          |
| D                         | 17    | 5     | 7     | 13    |       |      | 16                       | 11                       | 18                       | 27                       |       |      |  |          |
| E                         | 4     | 6     | 7     | 16    |       |      | 16                       | 22                       | 12                       | 15                       |       |      |  |          |
| F                         | 11    | 7     | 10    | 14    |       |      | 12                       | 12                       | 13                       | 16                       |       |      |  |          |
| G                         | 3     | 6     | 2     | 11    |       |      | 9                        | 9                        | 11                       | 13                       |       |      |  |          |
| H                         | 5     | 0     | 2     | 1     |       |      | 3                        | 0                        | 3                        | 4                        |       |      |  |          |
| I                         | 9     | 6     | 9     | 9     |       |      | 10                       | 12                       | 10                       | 12                       |       |      |  |          |
| J                         | 1     | 0     | 0     | 0     |       |      | 1                        | 0                        | 0                        | 0                        |       |      |  |          |
| K                         | 1     | 0     | 0     | 2     |       |      | 1                        | 2                        | 0                        | 0                        |       |      |  |          |
| L                         | 0     | 0     | 0     | 0     |       |      | 0                        | 0                        | 0                        | 0                        |       |      |  |          |
| Total                     | 1401  | 1102  | 1036  | 1832  |       |      | 1001                     | 1066                     | 907                      | 1183                     |       |      |  |          |
| <i>I1b</i> (cM)           | 8.99  | 7.35  | 7.38  | 8.73  | 7.91  | 0.94 | 11.59                    | 9.76                     | 11.36                    | 11.24                    | 10.99 | 0.83 |  |          |
| <i>I1c</i> (cM)           | 19.09 | 19.24 | 21.04 | 20.06 | 19.79 | 1.09 | 22.88                    | 25.75                    | 23.59                    | 23.12                    | 23.84 | 1.31 |  |          |
| <i>I1bc</i> (cM)          | 26.34 | 26.63 | 27.32 | 28.14 | 26.76 | 0.5  | 32.67                    | 34.01                    | 34.01                    | 32.97                    | 33.41 | 0.7  |  |          |
| 0.27<br>×10 <sup>-3</sup> |       |       |       |       |       |      |                          |                          |                          |                          |       |      |  |          |

|                  |       |       |       |       |       |      |               |               |               |               |       |      |                          |
|------------------|-------|-------|-------|-------|-------|------|---------------|---------------|---------------|---------------|-------|------|--------------------------|
| w/o_adj_C<br>O   | 0.11  | 0.1   | 0.1   | 0.11  | 0.1   | 0.01 | 0.14          | 0.13          | 0.14          | 0.14          | 0.14  | 0.01 |                          |
| w_adj_CO         | 0.04  | 0.03  | 0.03  | 0.04  | 0.04  | 0.01 | 0.07          | 0.06          | 0.07          | 0.07          | 0.07  | 0.07 | 0.01                     |
| IFR              | 0.38  | 0.31  | 0.34  | 0.36  | 0.34  | 0.03 | 0.52          | 0.45          | 0.5           | 0.52          | 0.5   | 0.03 |                          |
|                  |       |       |       |       |       |      |               |               |               |               |       |      |                          |
| Genotype         | Col   | Col   | Col   | Col   | Mean  | SD   | <i>hcr1-1</i> | <i>hcr1-1</i> | <i>hcr1-1</i> | <i>hcr1-1</i> | Mean  | SD   | <i>P</i>                 |
| A                | 879   | 670   | 766   | 815   |       |      | 479           | 614           | 396           | 560           |       |      | 8.1<br>×10 <sup>-3</sup> |
| B                | 458   | 332   | 353   | 366   |       |      | 391           | 480           | 349           | 515           |       |      |                          |
| C                | 111   | 74    | 94    | 87    |       |      | 127           | 175           | 86            | 146           |       |      |                          |
| D                | 5     | 3     | 4     | 5     |       |      | 8             | 17            | 7             | 17            |       |      |                          |
| E                | 6     | 5     | 4     | 1     |       |      | 11            | 15            | 8             | 14            |       |      |                          |
| F                | 3     | 4     | 1     | 4     |       |      | 8             | 11            | 9             | 15            |       |      |                          |
| G                | 2     | 2     | 4     | 1     |       |      | 5             | 14            | 11            | 13            |       |      |                          |
| H                | 7     | 3     | 4     | 5     |       |      | 10            | 17            | 11            | 21            |       |      |                          |
| I                | 2     | 2     | 1     | 1     |       |      | 3             | 2             | 1             | 1             |       |      |                          |
| J                | 1     | 0     | 0     | 0     |       |      | 1             | 1             | 1             | 1             |       |      |                          |
| K                | 0     | 0     | 0     | 0     |       |      | 2             | 3             | 0             | 0             |       |      |                          |
| L                | 0     | 0     | 0     | 0     |       |      | 0             | 0             | 0             | 0             |       |      |                          |
| Total            | 1474  | 1095  | 1231  | 1285  |       |      | 1045          | 1349          | 879           | 1303          |       |      |                          |
| <i>I3b</i> (cM)  | 17.71 | 16.62 | 15.84 | 15.84 | 16.5  | 0.88 | 23.49         | 24.02         | 25.94         | 27.09         | 25.14 | 1.68 |                          |
| <i>I3c</i> (cM)  | 4.75  | 4.57  | 4.59  | 4.05  | 4.49  | 0.31 | 9.09          | 9.75          | 7.28          | 8.14          | 8.56  | 1.08 |                          |
| <i>I3bc</i> (cM) | 21.88 | 20.87 | 20.55 | 19.46 | 20.69 | 1    | 31            | 32.73         | 33.62         | 34.57         | 32.98 | 1.52 |                          |
| w/o_adj_C<br>O   | 0.19  | 0.17  | 0.17  | 0.17  | 0.17  | 0.01 | 0.26          | 0.26          | 0.27          | 0.29          | 0.27  | 0.02 |                          |
| w_adj_CO         | 0.08  | 0.08  | 0.06  | 0.06  | 0.07  | 0.01 | 0.12          | 0.14          | 0.17          | 0.16          | 0.15  | 0.02 |                          |
| IFR              | 0.45  | 0.45  | 0.36  | 0.33  | 0.4   | 0.06 | 0.47          | 0.53          | 0.61          | 0.54          | 0.54  | 0.06 |                          |



**Supplementary Table 15. 420 crossover frequency in wild type and *meiMIGS-PPX1-PPX2* Col/Ler F<sub>1</sub> hybrids.** 420 crossover frequency was measured by analyzing counts of fluorescence and non-fluorescent seeds from 420/++ hemizygote plants, using CellProfiler<sup>1,2</sup>. In the seeds from self-fertilized 420/++ plants, CellProfiler determines the numbers of green-alone fluorescent seeds (N<sub>Green</sub>), red-alone fluorescent seeds (N<sub>Red</sub>) and total seeds (N<sub>Total</sub>). Crossover frequency (cM) is calculated using the formula:  $cM = 100 \times (1 - [1 - 2(N_{Green} + N_{Red})/N_{Total}]^{1/2})^{3,4}$ . To test for significant differences between wild type and *meiMIGS-PPX1-PPX2*, a *P* value was calculated using a one-sided Welch's t-test.

| Genotype                                        | Green | Red | Both | None | Total | cM    | G/Ng | R/nR | Mean  | SD   | <i>P</i> value         |
|-------------------------------------------------|-------|-----|------|------|-------|-------|------|------|-------|------|------------------------|
| Wild type Col/Ler                               | 143   | 146 | 1471 | 387  | 2147  | 14.51 | 3.03 | 3.05 | 13.45 | 0.9  |                        |
| Wild type Col/Ler                               | 134   | 106 | 1358 | 358  | 1956  | 13.13 | 3.22 | 2.98 |       |      |                        |
| Wild type Col/Ler                               | 116   | 94  | 1295 | 356  | 1861  | 12    | 3.14 | 2.94 |       |      |                        |
| Wild type Col/Ler                               | 157   | 122 | 1461 | 398  | 2138  | 14.03 | 3.11 | 2.85 |       |      |                        |
| Wild type Col/Ler                               | 110   | 150 | 1353 | 385  | 1998  | 13.99 | 2.73 | 3.04 |       |      |                        |
| Wild type Col/Ler                               | 148   | 121 | 1453 | 360  | 2082  | 13.88 | 3.33 | 3.1  |       |      |                        |
| Wild type Col/Ler                               | 82    | 89  | 998  | 282  | 1451  | 12.58 | 2.91 | 2.99 |       |      |                        |
| <i>meiMIGS-PPX1-PPX2</i> Col/Ler F <sub>1</sub> | 207   | 169 | 1345 | 296  | 2017  | 20.81 | 3.34 | 3.01 | 21.17 | 1.56 | 6.55×10 <sup>-11</sup> |
| <i>meiMIGS-PPX1-PPX2</i> Col/Ler F <sub>1</sub> | 204   | 219 | 1319 | 316  | 2058  | 23.26 | 2.85 | 2.96 |       |      |                        |
| <i>meiMIGS-PPX1-PPX2</i> Col/Ler F <sub>1</sub> | 194   | 172 | 1286 | 326  | 1978  | 20.63 | 2.97 | 2.8  |       |      |                        |
| <i>meiMIGS-PPX1-PPX2</i> Col/Ler F <sub>1</sub> | 200   | 201 | 1307 | 308  | 2016  | 22.4  | 2.96 | 2.97 |       |      |                        |
| <i>meiMIGS-PPX1-PPX2</i> Col/Ler F <sub>1</sub> | 147   | 150 | 1212 | 310  | 1819  | 17.94 | 2.95 | 2.98 |       |      |                        |
| <i>meiMIGS-PPX1-PPX2</i> Col/Ler F <sub>1</sub> | 178   | 185 | 1299 | 318  | 1980  | 20.42 | 2.94 | 2.99 |       |      |                        |
| <i>meiMIGS-PPX1-PPX2</i> Col/Ler F <sub>1</sub> | 175   | 169 | 1257 | 300  | 1901  | 20.12 | 3.05 | 3    |       |      |                        |
| <i>meiMIGS-PPX1-PPX2</i> Col/Ler F <sub>1</sub> | 165   | 181 | 1076 | 254  | 1676  | 23.38 | 2.85 | 3    |       |      |                        |
| <i>meiMIGS-PPX1-PPX2</i> Col/Ler F <sub>1</sub> | 137   | 144 | 1030 | 257  | 1568  | 19.9  | 2.91 | 2.98 |       |      |                        |
| <i>meiMIGS-PPX1-PPX2</i> Col/Ler F <sub>1</sub> | 150   | 154 | 984  | 242  | 1530  | 22.37 | 2.86 | 2.9  |       |      |                        |
| <i>meiMIGS-PPX1-PPX2</i> Col/Ler F <sub>1</sub> | 152   | 149 | 1011 | 245  | 1557  | 21.68 | 2.95 | 2.92 |       |      |                        |
| <i>meiMIGS-PPX1-PPX2</i> Col/Ler F <sub>1</sub> | 138   | 158 | 1011 | 258  | 1565  | 21.15 | 2.76 | 2.95 |       |      |                        |

**Supplementary Table 16. Crossover numbers identified by sequencing wild type and *meiMIGS-PPX1-PPX2* Col/Ler F<sub>2</sub> populations.**

|                           | Wild type | <i>meiMIGS-PPX1-PPX2</i> |
|---------------------------|-----------|--------------------------|
| Total crossovers          | 1,132     | 1,645                    |
| Chr1 crossovers           | 271       | 395                      |
| Chr2 crossovers           | 193       | 281                      |
| Chr3 crossovers           | 220       | 323                      |
| Chr4 crossovers           | 187       | 262                      |
| Chr5 crossovers           | 261       | 384                      |
| Individuals               | 144       | 192                      |
| Crossovers width (bp)     | 962       | 936                      |
| Crossovers/F <sub>2</sub> | 7.86      | 8.57                     |

**Supplementary Table 17. Pollen viability in wild type, *hcr1-1*, *hcr1-2*, *ppx2-1* and *pp4r2* mutants measured using Alexander staining.** Alexander staining of pollen was performed to measure pollen viability. Significance between wild type and mutant measurements were assessed by one-sided Welch's t-tests.

| Genotype      | Plant | Viable | Inviabile | Total | % Viable | % Inviabile | <i>P</i> value |
|---------------|-------|--------|-----------|-------|----------|-------------|----------------|
| Wild type     | 1     | 1180   | 7         | 1187  | 99.41    | 0.59        |                |
| Wild type     | 2     | 1130   | 6         | 1136  | 99.47    | 0.53        |                |
| Wild type     | 3     | 1204   | 6         | 1210  | 99.50    | 0.50        |                |
| Wild type     | 4     | 1002   | 6         | 1008  | 99.40    | 0.60        |                |
| Wild type     | 5     | 1191   | 56        | 1247  | 95.51    | 4.49        |                |
| Wild type     | 6     | 1121   | 0         | 1121  | 100.00   | 0.00        |                |
| <i>hcr1-1</i> | 1     | 1109   | 0         | 1109  | 100.00   | 0.00        | 0.126          |
| <i>hcr1-1</i> | 2     | 1152   | 0         | 1152  | 100.00   | 0.00        |                |
| <i>hcr1-1</i> | 3     | 1288   | 1         | 1289  | 99.92    | 0.08        |                |
| <i>hcr1-1</i> | 4     | 1147   | 6         | 1153  | 99.48    | 0.52        |                |
| <i>hcr1-1</i> | 5     | 1153   | 9         | 1162  | 99.23    | 0.77        |                |
| <i>hcr1-1</i> | 6     | 1068   | 0         | 1068  | 100.00   | 0.00        |                |
| <i>hcr1-2</i> | 1     | 1092   | 2         | 1094  | 99.82    | 0.18        | 0.121          |
| <i>hcr1-2</i> | 2     | 1081   | 4         | 1085  | 99.63    | 0.37        |                |
| <i>hcr1-2</i> | 3     | 1012   | 4         | 1016  | 99.61    | 0.39        |                |
| <i>hcr1-2</i> | 4     | 1348   | 0         | 1348  | 100.00   | 0.00        |                |
| <i>hcr1-2</i> | 5     | 1407   | 1         | 1408  | 99.93    | 0.07        |                |
| <i>hcr1-2</i> | 6     | 1093   | 3         | 1096  | 99.73    | 0.27        |                |
| <i>ppx2-1</i> | 1     | 1085   | 0         | 1085  | 100.00   | 0.00        | 0.140          |
| <i>ppx2-1</i> | 2     | 1106   | 11        | 1117  | 99.02    | 0.98        |                |
| <i>ppx2-1</i> | 3     | 955    | 0         | 955   | 100.00   | 0.00        |                |
| <i>ppx2-1</i> | 4     | 1336   | 0         | 1336  | 100.00   | 0.00        |                |
| <i>ppx2-1</i> | 5     | 1194   | 0         | 1194  | 100.00   | 0.00        |                |
| <i>ppx2-1</i> | 6     | 1015   | 7         | 1022  | 99.32    | 0.68        |                |
| <i>pp4r2</i>  | 1     | 1068   | 0         | 1068  | 100.00   | 0.00        | 0.094          |
| <i>pp4r2</i>  | 2     | 1067   | 5         | 1072  | 99.53    | 0.47        |                |
| <i>pp4r2</i>  | 3     | 1022   | 0         | 1022  | 100.00   | 0.00        |                |
| <i>pp4r2</i>  | 4     | 1141   | 0         | 1141  | 100.00   | 0.00        |                |
| <i>pp4r2</i>  | 5     | 1258   | 0         | 1258  | 100.00   | 0.00        |                |
| <i>pp4r2</i>  | 6     | 1023   | 0         | 1023  | 100.00   | 0.00        |                |

**Supplementary Table 18. RAD51 foci number per cell in wild type and *hcr1*.** To test for significant differences in RAD51 foci number between wild type and *hcr1-1*, *P* values were calculated using a Wilcoxon test.

|                | Wild type     | <i>hcr1-1</i> |
|----------------|---------------|---------------|
|                | 193           | 193           |
|                | 140           | 140           |
|                | 153           | 153           |
|                | 139           | 139           |
|                | 167           | 167           |
|                | 164           | 164           |
|                | 155           | 155           |
|                | 129           | 129           |
|                | 177           | 177           |
|                | 129           | 129           |
|                | 136           | 136           |
|                | 143           | 143           |
|                | 142           | 142           |
|                | 149           | 149           |
| Mean           | 151<br>(n=14) | 145<br>(n=14) |
| SD             | 18.5          | 21.4          |
| <i>P</i> value |               | 0.32          |

**Supplementary Table 19. MLH1 foci number per cell in wild type and *hcr1*.** To test for significant differences in MLH1 foci numbers between wild type and *hcr1-1*, *P* values were calculated using a Wilcoxon test.

| Total MLH1 foci in wild type | Total MLH1 foci in <i>hcr1-1</i> |
|------------------------------|----------------------------------|
| 12                           | 14                               |
| 11                           | 10                               |
| 12                           | 14                               |
| 9                            | 11                               |
| 10                           | 13                               |
| 9                            | 12                               |
| 10                           | 13                               |
| 9                            | 12                               |
| 11                           | 14                               |
| 11                           | 12                               |
| 9                            | 12                               |
| 12                           | 14                               |
| 11                           | 10                               |
| 12                           | 12                               |
| 8                            | 15                               |
| 10                           | 12                               |
| 9                            | 9                                |
| 11                           | 13                               |
| 12                           | 11                               |
| 12                           | 12                               |
| 10                           | 11                               |
| 10                           | 9                                |
| 11                           | 11                               |
| 9                            | 14                               |
| 10                           | 11                               |
| 11                           | 12                               |
| 9                            | 9                                |
| 13                           | 12                               |
| 10                           | 10                               |
| 9                            | 14                               |
| 9                            | 12                               |
| 11                           | 13                               |
| 10                           | 10                               |
| 9                            | 12                               |
| 10                           | 13                               |

|                |             |                      |
|----------------|-------------|----------------------|
|                | 9           | 11                   |
|                | 10          | 14                   |
|                | 10          | 14                   |
|                | 8           | 9                    |
|                | 11          | 14                   |
|                | 10          | 11                   |
|                | 10          | 12                   |
|                | 12          | 11                   |
|                | 11          | 11                   |
|                | 13          | 12                   |
|                | 12          | 14                   |
|                | 12          | 14                   |
|                | 12          | 15                   |
|                | 11          | 13                   |
|                | 10          | 13                   |
|                | 9           |                      |
| Mean           | 10.4 (n=51) | 12.1 (n=50)          |
| SD             | 1.3         | 1.6                  |
| <i>P</i> value |             | $5.3 \times 10^{-7}$ |

**Supplementary Table 20. MLH1 foci at diakinesis cells in Col and *meiMIGS-PPX1-PPX2*.**  
 To test for significant differences in MLH1 foci numbers between wild type and *meiMIGS-PPX1-PPX2*, *P* values were calculated using a Wilcoxon test.

|          | Wild type (Col) | <i>meiMIGS-PPX1-PPX2</i> |
|----------|-----------------|--------------------------|
|          | 11              | 15                       |
|          | 12              | 12                       |
|          | 9               | 14                       |
|          | 12              | 12                       |
|          | 11              | 12                       |
|          | 11              | 16                       |
|          | 11              | 13                       |
|          | 12              | 16                       |
|          | 12              | 13                       |
|          | 11              | 12                       |
|          | 10              | 13                       |
|          | 11              | 15                       |
|          | 11              | 11                       |
|          | 13              | 10                       |
|          | 12              | 13                       |
|          | 10              | 12                       |
|          | 11              | 13                       |
|          | 12              | 14                       |
|          | 9               | 13                       |
|          | 13              | 13                       |
|          | 10              | 14                       |
|          | 9               | 13                       |
|          | 8               | 11                       |
|          | 10              | 14                       |
|          | 9               | 11                       |
|          | 9               | 11                       |
|          | 9               | 12                       |
|          |                 | 13                       |
|          |                 | 12                       |
|          |                 | 12                       |
| Mean     | 10.7            | 12.8                     |
| SD       | 1.4             | 1.5                      |
| <i>P</i> |                 | $2.5 \times 10^{-6}$     |

**Supplementary Table 21. Chiasma, univalent and bivalent counts from meiotic chromosome spreads in wild type (Col), *zip4* and *zip4 hcr1*.** To test for significant differences in bivalent counts between wild type, *zip4* and *zip4 hcr1*, *P* values were calculated using a Wilcoxon test.

| Genotype    | Chiasma | Bivalents | Univalents |
|-------------|---------|-----------|------------|
| Col         | 11      | 5         | 0          |
| Col         | 9       | 5         | 0          |
| Col         | 10      | 5         | 0          |
| Col         | 9       | 5         | 0          |
| Col         | 9       | 5         | 0          |
| Col         | 10      | 5         | 0          |
| Col         | 10      | 5         | 0          |
| Col         | 10      | 5         | 0          |
| Col         | 10      | 5         | 0          |
| Col         | 10      | 5         | 0          |
| Col         | 10      | 5         | 0          |
| Col         | 9       | 5         | 0          |
| Col         | 11      | 5         | 0          |
| Col         | 11      | 5         | 0          |
| Col         | 10      | 5         | 0          |
| Col         | 11      | 5         | 0          |
| Col         | 10      | 5         | 0          |
| Col         | 10      | 5         | 0          |
| Col         | 10      | 5         | 0          |
| Col         | 11      | 5         | 0          |
| Col         | 10      | 5         | 0          |
| Col         | 10      | 5         | 0          |
| Col         | 9       | 5         | 0          |
| Col         | 11      | 5         | 0          |
| Col         | 11      | 5         | 0          |
| Col         | 9       | 5         | 0          |
| Col         | 11      | 5         | 0          |
| Col         | 9       | 5         | 0          |
| Mean        | 10.04   | 5         | 0          |
| <i>zip4</i> | 2       | 2         | 6          |
| <i>zip4</i> | 1       | 1         | 8          |
| <i>zip4</i> | 2       | 1         | 8          |
| <i>zip4</i> | 1       | 1         | 8          |
| <i>zip4</i> | 0       | 0         | 10         |
| <i>zip4</i> | 2       | 1         | 8          |
| <i>zip4</i> | 2       | 1         | 8          |
| <i>zip4</i> | 2       | 2         | 6          |
| <i>zip4</i> | 0       | 0         | 10         |



|                                      |      |                        |      |
|--------------------------------------|------|------------------------|------|
| <i>zip4</i>                          | 1    | 1                      | 8    |
| <i>zip4</i>                          | 3    | 2                      | 6    |
| <i>zip4</i>                          | 1    | 1                      | 8    |
| <i>zip4</i>                          | 1    | 1                      | 8    |
| <i>zip4</i>                          | 0    | 0                      | 10   |
| <i>zip4</i>                          | 0    | 0                      | 10   |
| <i>zip4</i>                          | 2    | 2                      | 6    |
| <i>zip4</i>                          | 0    | 0                      | 10   |
| <i>zip4</i>                          | 1    | 1                      | 8    |
| <i>zip4</i>                          | 2    | 2                      | 6    |
| <i>zip4</i>                          | 0    | 0                      | 10   |
| <i>zip4</i>                          | 0    | 0                      | 10   |
| <i>zip4</i>                          | 0    | 0                      | 10   |
| <i>zip4</i>                          | 1    | 1                      | 8    |
| <i>zip4</i>                          | 0    | 0                      | 10   |
| <i>zip4</i>                          | 1    | 1                      | 8    |
| <i>zip4</i>                          | 1    | 0                      | 10   |
| <i>zip4</i>                          | 2    | 1                      | 8    |
| <i>zip4</i>                          | 0    | 0                      | 10   |
| <i>zip4</i>                          | 1    | 0                      | 10   |
| <i>zip4</i>                          | 2    | 2                      | 6    |
| <i>zip4</i>                          | 1    | 1                      | 8    |
| <i>zip4</i>                          | 0    | 0                      | 10   |
| Mean                                 | 1.00 | 0.8                    | 8.44 |
| <i>P</i> value (Col vs <i>zip4</i> ) |      | $5.22 \times 10^{-12}$ |      |
| <i>zip4 hcr1</i>                     | 2    | 2                      | 6    |
| <i>zip4 hcr1</i>                     | 2    | 2                      | 6    |
| <i>zip4 hcr1</i>                     | 0    | 0                      | 10   |
| <i>zip4 hcr1</i>                     | 2    | 2                      | 6    |
| <i>zip4 hcr1</i>                     | 0    | 0                      | 10   |
| <i>zip4 hcr1</i>                     | 0    | 0                      | 10   |
| <i>zip4 hcr1</i>                     | 2    | 2                      | 6    |
| <i>zip4 hcr1</i>                     | 0    | 0                      | 10   |
| <i>zip4 hcr1</i>                     | 1    | 0                      | 10   |
| <i>zip4 hcr1</i>                     | 1    | 0                      | 10   |
| <i>zip4 hcr1</i>                     | 2    | 2                      | 6    |
| <i>zip4 hcr1</i>                     | 3    | 3                      | 4    |
| <i>zip4 hcr1</i>                     | 2    | 1                      | 8    |
| <i>zip4 hcr1</i>                     | 1    | 1                      | 8    |
| <i>zip4 hcr1</i>                     | 2    | 1                      | 8    |
| <i>zip4 hcr1</i>                     | 1    | 1                      | 8    |

|                                                    |       |                        |      |
|----------------------------------------------------|-------|------------------------|------|
| <i>zip4 hcr1</i>                                   | 3     | 2                      | 6    |
| <i>zip4 hcr1</i>                                   | 3     | 2                      | 6    |
| <i>zip4 hcr1</i>                                   | 1     | 0                      | 10   |
| <i>zip4 hcr1</i>                                   | 4     | 3                      | 4    |
| <i>zip4 hcr1</i>                                   | 0     | 0                      | 10   |
| <i>zip4 hcr1</i>                                   | 0     | 0                      | 10   |
| <i>zip4 hcr1</i>                                   | 4     | 3                      | 4    |
| <i>zip4 hcr1</i>                                   | 2     | 2                      | 6    |
| <i>zip4 hcr1</i>                                   | 1     | 1                      | 8    |
| <i>zip4 hcr1</i>                                   | 1     | 1                      | 8    |
| <i>zip4 hcr1</i>                                   | 5     | 4                      | 2    |
| <i>zip4 hcr1</i>                                   | 0     | 0                      | 10   |
| <i>zip4 hcr1</i>                                   | 2     | 2                      | 6    |
| Mean                                               | 1.62  | 1.3                    | 7.45 |
| <i>P</i> value (Col vs <i>zip4 hcr1</i> )          |       | $1.43 \times 10^{-11}$ |      |
| <i>P</i> value ( <i>zip4</i> vs <i>zip4 hcr1</i> ) | 0.075 | 0.11                   |      |

**Supplementary Table 22. 420 crossover frequency (cM) in wild type, *hcr1*, *fancm*, *fancm zip4*, *hcr1 fancm* and *hcr1 fancm zip4* mutants.** 420 crossover frequency was measured by analyzing counts of fluorescence and non-fluorescent seeds from 420/++ hemizygote plants, using CellProfiler<sup>1,2</sup>. In the seeds from self-fertilized 420/++ plants, CellProfiler determines the numbers of green-alone fluorescent seeds ( $N_{\text{Green}}$ ), red-alone fluorescent seeds ( $N_{\text{Red}}$ ) and total seeds ( $N_{\text{Total}}$ ). Crossover frequency (cM) is calculated using the formula:  $\text{cM} = 100 \times (1 - [1 - 2(N_{\text{Green}} + N_{\text{Red}}) / N_{\text{Total}}]^{1/2})^{3,4}$ . To test for significant differences between genotypes, *P* values were calculated using one-sided Welch's t-tests.

| Genotype          | Green | Red | Both | None | Total | cM    | G/nG | R/nR | Mean  | SD   | <i>P</i> value                                                                                                                              |
|-------------------|-------|-----|------|------|-------|-------|------|------|-------|------|---------------------------------------------------------------------------------------------------------------------------------------------|
| Wild type         | 196   | 176 | 1463 | 367  | 2202  | 18.63 | 3.06 | 2.91 | 19.01 | 1.2  |                                                                                                                                             |
| Wild type         | 160   | 174 | 1457 | 363  | 2154  | 16.94 | 3.01 | 3.12 |       |      |                                                                                                                                             |
| Wild type         | 184   | 190 | 1536 | 369  | 2279  | 18.04 | 3.08 | 3.12 |       |      |                                                                                                                                             |
| Wild type         | 164   | 169 | 1320 | 313  | 1966  | 18.68 | 3.08 | 3.12 |       |      |                                                                                                                                             |
| Wild type         | 223   | 190 | 1435 | 344  | 2192  | 21.06 | 3.1  | 2.87 |       |      |                                                                                                                                             |
| Wild type         | 178   | 190 | 1443 | 249  | 2060  | 19.83 | 3.69 | 3.82 |       |      |                                                                                                                                             |
| Wild type         | 193   | 151 | 1384 | 317  | 2045  | 18.54 | 3.37 | 3.01 |       |      |                                                                                                                                             |
| Wild type         | 145   | 146 | 1067 | 263  | 1621  | 19.94 | 2.96 | 2.97 |       |      |                                                                                                                                             |
| Wild type         | 191   | 165 | 1344 | 333  | 2033  | 19.39 | 3.08 | 2.88 |       |      |                                                                                                                                             |
| <i>hcr1</i>       | 219   | 167 | 1120 | 266  | 1772  | 24.88 | 3.09 | 2.65 | 24.48 | 0.87 | Between wild type and <i>hcr1</i> = $1.24 \times 10^{-8}$                                                                                   |
| <i>hcr1</i>       | 188   | 176 | 1016 | 241  | 1621  | 25.78 | 2.89 | 2.78 |       |      |                                                                                                                                             |
| <i>hcr1</i>       | 164   | 133 | 897  | 204  | 1398  | 24.16 | 3.15 | 2.8  |       |      |                                                                                                                                             |
| <i>hcr1</i>       | 201   | 202 | 1306 | 271  | 1980  | 23    | 3.19 | 3.19 |       |      |                                                                                                                                             |
| <i>hcr1</i>       | 255   | 202 | 1332 | 287  | 2076  | 25.18 | 3.25 | 2.83 |       |      |                                                                                                                                             |
| <i>hcr1</i>       | 189   | 155 | 1036 | 224  | 1604  | 24.43 | 3.23 | 2.88 |       |      |                                                                                                                                             |
| <i>hcr1</i>       | 186   | 190 | 1143 | 279  | 1798  | 23.73 | 2.83 | 2.87 |       |      |                                                                                                                                             |
| <i>hcr1</i>       | 164   | 194 | 1046 | 251  | 1655  | 24.68 | 2.72 | 2.99 |       |      |                                                                                                                                             |
| <i>fancm</i>      | 174   | 155 | 710  | 146  | 1185  | 33.31 | 2.94 | 2.7  | 34.52 | 1.92 | Between wild type and <i>fancm</i> = $1.54 \times 10^{-10}$                                                                                 |
| <i>fancm</i>      | 173   | 152 | 738  | 156  | 1219  | 31.68 | 2.96 | 2.71 |       |      |                                                                                                                                             |
| <i>fancm</i>      | 206   | 209 | 800  | 165  | 1380  | 36.87 | 2.69 | 2.72 |       |      |                                                                                                                                             |
| <i>fancm</i>      | 218   | 190 | 830  | 152  | 1390  | 35.74 | 3.06 | 2.76 |       |      |                                                                                                                                             |
| <i>fancm</i>      | 134   | 150 | 537  | 135  | 956   | 36.29 | 2.35 | 2.55 |       |      |                                                                                                                                             |
| <i>fancm</i>      | 212   | 215 | 961  | 179  | 1567  | 32.55 | 2.98 | 3.01 |       |      |                                                                                                                                             |
| <i>fancm</i>      | 319   | 277 | 1218 | 213  | 2027  | 35.82 | 3.14 | 2.81 |       |      |                                                                                                                                             |
| <i>fancm</i>      | 224   | 250 | 979  | 232  | 1685  | 33.86 | 2.5  | 2.7  |       |      |                                                                                                                                             |
| <i>hcr1 fancm</i> | 189   | 183 | 672  | 109  | 1153  | 40.44 | 2.95 | 2.87 | 40.32 | 1.56 | Between <i>hcr1</i> and <i>hcr1 fancm</i> = $2.7 \times 10^{-11}$<br><br>Between <i>fancm</i> and <i>hcr1 fancm</i> = $6.77 \times 10^{-6}$ |
| <i>hcr1 fancm</i> | 232   | 209 | 814  | 121  | 1376  | 40.08 | 3.17 | 2.9  |       |      |                                                                                                                                             |
| <i>hcr1 fancm</i> | 276   | 270 | 1048 | 161  | 1755  | 38.54 | 3.07 | 3.02 |       |      |                                                                                                                                             |
| <i>hcr1 fancm</i> | 246   | 250 | 932  | 131  | 1559  | 39.69 | 3.09 | 3.14 |       |      |                                                                                                                                             |
| <i>hcr1 fancm</i> | 263   | 269 | 892  | 138  | 1562  | 43.54 | 2.84 | 2.9  |       |      |                                                                                                                                             |
| <i>hcr1 fancm</i> | 309   | 257 | 1077 | 156  | 1799  | 39.11 | 3.36 | 2.87 |       |      |                                                                                                                                             |
| <i>hcr1 fancm</i> | 316   | 297 | 1141 | 172  | 1926  | 39.71 | 3.11 | 2.95 |       |      |                                                                                                                                             |
| <i>hcr1 fancm</i> | 267   | 245 | 897  | 149  | 1558  | 41.46 | 2.95 | 2.75 |       |      |                                                                                                                                             |
| <i>fancm zip4</i> | 269   | 290 | 1187 | 227  | 1973  | 34.17 | 2.82 | 2.98 | 35    | 1.77 | Between <i>fancm</i> and <i>fancm zip4</i> = 0.292                                                                                          |
| <i>fancm zip4</i> | 252   | 295 | 1131 | 187  | 1865  | 35.7  | 2.87 | 3.25 |       |      |                                                                                                                                             |
| <i>fancm zip4</i> | 354   | 301 | 1274 | 246  | 2175  | 36.94 | 2.98 | 2.63 |       |      |                                                                                                                                             |
| <i>fancm zip4</i> | 278   | 327 | 1316 | 202  | 2123  | 34.42 | 3.01 | 3.42 |       |      |                                                                                                                                             |

|                       |     |     |      |     |      |       |      |      |       |      |                                                                                                                   |
|-----------------------|-----|-----|------|-----|------|-------|------|------|-------|------|-------------------------------------------------------------------------------------------------------------------|
| <i>fanm zip4</i>      | 160 | 148 | 688  | 110 | 1106 | 33.44 | 3.29 | 3.1  |       |      |                                                                                                                   |
| <i>fanm zip4</i>      | 200 | 172 | 708  | 116 | 1196 | 38.52 | 3.15 | 2.78 |       |      |                                                                                                                   |
| <i>fanm zip4</i>      | 264 | 216 | 1061 | 179 | 1720 | 33.53 | 3.35 | 2.88 |       |      |                                                                                                                   |
| <i>fanm zip4</i>      | 272 | 327 | 1247 | 208 | 2054 | 35.44 | 2.84 | 3.28 |       |      |                                                                                                                   |
| <i>fanm zip4</i>      | 298 | 293 | 1269 | 262 | 2122 | 33.44 | 2.82 | 2.79 |       |      |                                                                                                                   |
| <i>fanm zip4</i>      | 336 | 329 | 1334 | 232 | 2231 | 36.45 | 2.98 | 2.93 |       |      |                                                                                                                   |
| <i>fanm zip4</i>      | 256 | 251 | 1143 | 193 | 1843 | 32.93 | 3.15 | 3.1  |       |      |                                                                                                                   |
| <i>hcr1 fanm zip4</i> | 260 | 282 | 1074 | 184 | 1800 | 36.93 | 2.86 | 3.05 |       |      |                                                                                                                   |
| <i>hcr1 fanm zip4</i> | 232 | 273 | 959  | 145 | 1609 | 38.99 | 2.85 | 3.27 |       |      |                                                                                                                   |
| <i>hcr1 fanm zip4</i> | 306 | 292 | 1201 | 169 | 1968 | 37.37 | 3.27 | 3.14 |       |      |                                                                                                                   |
| <i>hcr1 fanm zip4</i> | 250 | 252 | 1105 | 142 | 1749 | 34.73 | 3.44 | 3.46 |       |      |                                                                                                                   |
| <i>hcr1 fanm zip4</i> | 258 | 237 | 987  | 179 | 1661 | 36.44 | 2.99 | 2.8  |       |      |                                                                                                                   |
| <i>hcr1 fanm zip4</i> | 251 | 251 | 1026 | 150 | 1678 | 36.62 | 3.18 | 3.18 |       |      |                                                                                                                   |
| <i>hcr1 fanm zip4</i> | 308 | 288 | 1176 | 225 | 1997 | 36.51 | 2.89 | 2.75 |       |      |                                                                                                                   |
| <i>hcr1 fanm zip4</i> | 339 | 312 | 1230 | 218 | 2099 | 38.38 | 2.96 | 2.77 | 37.47 | 1.79 | Between<br><i>fanm</i><br><i>zip4</i> and<br><i>hcr1</i><br><i>fanm</i><br><i>zip4</i> =<br>$9.93 \times 10^{-4}$ |
| <i>hcr1 fanm zip4</i> | 260 | 293 | 1003 | 166 | 1722 | 40.19 | 2.75 | 3.04 |       |      |                                                                                                                   |
| <i>hcr1 fanm zip4</i> | 290 | 357 | 1245 | 217 | 2109 | 37.84 | 2.67 | 3.16 |       |      | Between<br><i>hcr1</i><br><i>fanm</i> and<br><i>hcr1</i><br><i>fanm</i><br><i>zip4</i> =<br>$5.60 \times 10^{-4}$ |
| <i>hcr1 fanm zip4</i> | 322 | 308 | 1274 | 210 | 2114 | 36.44 | 3.08 | 2.97 |       |      |                                                                                                                   |
| <i>hcr1 fanm zip4</i> | 300 | 332 | 1235 | 209 | 2076 | 37.46 | 2.84 | 3.08 |       |      |                                                                                                                   |
| <i>hcr1 fanm zip4</i> | 381 | 351 | 1297 | 189 | 2218 | 41.7  | 3.11 | 2.89 |       |      |                                                                                                                   |
| <i>hcr1 fanm zip4</i> | 278 | 268 | 1074 | 184 | 1804 | 37.18 | 2.99 | 2.9  |       |      |                                                                                                                   |
| <i>hcr1 fanm zip4</i> | 322 | 291 | 1271 | 223 | 2107 | 35.34 | 3.1  | 2.87 |       |      |                                                                                                                   |

**Supplementary Table 23. Yeast two hybrid analysis of interactions between PPX1/HCR1 with meiotic proteins.** ++ indicates a strong interaction between PPX1 and meiotic proteins, meaning that yeast cells grew on synthetic dropout medium lacking leucine, tryptophan, histidine and adenine in 3 days. + indicates a weak interaction and that yeast cells grew in 5-7 days. - displays no yeast cell growth and non-interaction. In this yeast two hybrid (Y2H) assay, PPX1 interacts with PTD, HEI10, MSH5, MER3, ZIP4, SHOC1, MLH1, ZYP1a, RPA1A, DMC1, RAD51, PRD1, PRD2, SPO11-1, MTOPVIB, ASY1, REC8, CDKA;1 and PP4R2L in at least one of Y2H combinations. PPX1 does not interact with SWI1, ASY3, PRD3, and HEIP1. PRD1-N indicates 1-821 of 1,330 amino acids, SHOC1-C indicates 850-1209 of 1594 amino acids. Asterisk (\*) shows auto-activity when a protein is fused to BD. n.d indicates not determined. The number in parentheses indicates the number of FxxP motifs. Kinase-specific phosphorylation sites for CDK, CDC7/DDK, ATM and ATR were predicted using GPS 5.0 (group based prediction system) (<http://gps.biocuckoo.cn/online.php>)<sup>11</sup>.

| Y2H components | Y2H combination |          |         | Y2H combination |          |         | FxxP motif number | CDK CDC7/DDK ATM/ATR |
|----------------|-----------------|----------|---------|-----------------|----------|---------|-------------------|----------------------|
|                | AD-protein      | BD alone | BD-PPX1 | BD-protein      | AD alone | AD-PPX1 |                   |                      |
| ZMMs           | AD-PTD          | -        | ++      | BD-PTD          | -        | ++      | 2                 | 2/0/1                |
|                | AD-MSH5         | -        | ++      | BD-MSH5         | -        | ++      | 1                 | 0/1/1                |
|                | AD-HEI10        | -        | -       | BD-HEI10        | -        | ++      | 2                 | 4/2/0                |
|                | AD-HEIP1        | -        | -       | BD-HEIP1*       | n.d.     | n.d.    | 3                 | 6/3/0                |
|                | AD-SHOC1-C      | -        | +       | BD-SHOC1-C*     | n.d.     | n.d.    | 0 (5)             | 10/13/2              |
|                | AD-MER3         | -        | +       | BD-MER3         | -        | -       | 2                 | 9/5/1                |
|                | AD-ZIP4         | -        | +       | BD-ZIP4         | -        | +       | 1                 | 3/4/2                |
|                | AD-MLH1         | -        | +       | BD-MLH1*        | n.d.     | n.d.    | 2                 | 2/2/2                |
| SC component   | AD-ZYP1a        | -        | +       | BD-ZYP1A        | -        | -       | 1                 | 1/4/2                |
| DSB Repair     | AD-RPA1A        | -        | ++      | BD-RPA1A        | n.d.     | n.d.    | 1                 | 1/1/2                |
|                | AD-DMC1         | -        | +       | BD-DMC1         | -        | -       | 0                 | 0/0/2                |
|                | AD-RAD51        | -        | +       | BD-RAD51        | -        | -       | 1                 | 4/1/1                |
| DSB formation  | AD-PRD1-N       | -        | ++      | BD-PRD1-N       | n.d.     | n.d.    | 0 (2)             | 2/3/6                |
|                | AD-PRD2         | -        | -       | BD-PRD2         | -        | +       | 1                 | 0/2/0                |
|                | AD-PRD3         | -        | -       | BD-PRD3         | -        | -       | 1                 | 0/0/4                |
|                | AD-SPO11-1      | -        | ++      | BD-SPO11-1      | -        | -       | 0                 | 2/0/1                |
|                | AD-MTOPVIB      | n.d.     | n.d.    | BD-MTOPVIB      | -        | ++      | 0                 | 1/2/2                |
| Axis element   | AD-ASY1         | -        | -       | BD-ASY1         | -        | +       | 0                 | 2/1/7                |
|                | AD-ASY3         | -        | -       | BD-ASY3         | -        | -       | 1                 | 7/5/4                |
|                | AD-REC8         | -        | ++      | BD-REC8         | -        | -       | 1                 | 5/2/1                |
|                | AD-SWI1         | -        | -       | BD-SWI1         | -        | -       | 1                 | 6/3/2                |
| CDK            | AD-CDKA;1       | -        | +       | BD-CDKA;1       | -        | -       | 1                 | 1/0/0                |
| PP4 complex    | AD-PP4R2L       | -        | ++      | BD-PP4R2L       | n.d.     | n.d.    | 0                 | 0/1/1                |
|                | AD-PP4R3A       | -        | +       | AD-PP4R3A       | n.d.     | n.d.    | 1                 | 1/2/3                |

**Supplementary Table 24. List of oligonucleotides used in this study.**

| Primer                  | Nucleotide sequence (5' to 3')                                                               |
|-------------------------|----------------------------------------------------------------------------------------------|
| ppx-1-F                 | CCATTTGATACAACATTACGAATCC                                                                    |
| ppx-1-R                 | CTTAAGAACACGACTGAA                                                                           |
| GABI_LB                 | ATAATAACGCTGCGGACATCTACATTTT                                                                 |
| ppx-2-F                 | ATTTTGTGGACCGAGGTTTTTATT                                                                     |
| ppx-2-R                 | TGATCTGCCACAAGATATGTATGA                                                                     |
| pp4r2-F                 | TGAAAAACCTTCTCTTTGGGG                                                                        |
| pp4r2-R                 | TGTTCAACAGATCCTTTTGGC                                                                        |
| LBb1.3                  | ATTTTGCCGATTCGGAAC                                                                           |
| zip4-2-F                | TTGCTACCTTGGGCTCTCTC                                                                         |
| zip4-2-R                | ATTCTGTTCTCGCTTTCCAG                                                                         |
| hcr1-F                  | CATGAAAGCAGGCAAATCACACGG                                                                     |
| hcr1-R                  | GAGCCATATTTACGCAAACACTC                                                                      |
| fancm-F                 | ACAATATATGTTTCGTGCAGGTAAGACATTGGAAG                                                          |
| fancm-R                 | CACCAATAGATGTTGCGACAAT                                                                       |
| QRT-F                   | GATGATGGTAATGTTTATGTTTGAGG                                                                   |
| QRT-R                   | CAAACACGGTTTATGTCTTAAATC                                                                     |
| PPX1-F                  | AAAACCTGCAGGCTGTTATCAACCTGACCCTTAGC                                                          |
| PPX1-R                  | TCCCCGGGGTCCTAATGCTTCCCTGTGAATC                                                              |
| PPX1-mid-F1             | GCTGTATCAACCTGACCCTTAGC                                                                      |
| PPX1-mid-R1             | GCAAGTACAACAGTCCCCACTCT                                                                      |
| PPX1-mid-F2             | ATGTATGTATTAGGATCGCAGGC                                                                      |
| PPX1-mid-R2             | GTATGAGGTTTCGATGGAGCTTCT                                                                     |
| PPX1-mid-F3             | GTGATTATGATTCTCCAGACGCC                                                                      |
| PPX1-mid-R3             | GTCCTTTTAGAGTCTTGAAGTTTG                                                                     |
| PPX1-mid-F4             | CCAAGATCGTTGATGTTGCTAATG                                                                     |
| PPX1-mid-R4             | CTGTGCAATGTATTAAGCTCGT                                                                       |
| PPX1-mid-F5             | AGCTAATTCTCTCTCCTTGGGAAG                                                                     |
| PPX1-mid-R5             | CATAGAACTGCCCATGGATGTC                                                                       |
| PPX1-mid-F6             | TCCATTGGGATAGTTATGTGGT                                                                       |
| PPX1-mid-F7             | GACTTGTCTTTGGAATATCCGCAC                                                                     |
| PPX1-mid-F8             | ACTCCTATTTCACTTATGCTCCAG                                                                     |
| pGreen-kan-NosT-F       | ATCGCCTTCTTGACGAGTT                                                                          |
| pGreen-kan-NosT-R       | CGATCCCCGGAATTAGAT                                                                           |
| pGreen-PPX1-LB-F        | CCATGCTTTGACTTGTGTATGT                                                                       |
| pGreen-PPX1-LB-R        | CTGACGTATGTGCTTAGCTCAT                                                                       |
| pGreen-PPX1-RB-F        | AGCTCGGAATTAACCCTCACT                                                                        |
| pGreen-PPX1-RB-R        | CTTCAATTCTAGAGCTTGACG                                                                        |
| FANCM-1F                | CTAAGGGTTTCTTCCAAAGAACG                                                                      |
| FANCM-1R                | CAGTAAGAGCCAGTATTCTCAGCT                                                                     |
| FANCM-2F                | GTGTTTGGACTTTTAAGTATCTTTC                                                                    |
| FANCM-2R                | GACTGGCCTTTCAATGTCTTACC                                                                      |
| FANCM-3F                | TGAGTTTATTGGTCAAAGTTCAGG                                                                     |
| FANCM-3R                | ACCATGATTGATGCAAGAACACTC                                                                     |
| FANCM-4F                | CTAGAGTAACCACTACGAGAACAGG                                                                    |
| FANCM-4R                | GCACTGTACTTCAATAGGATATAC                                                                     |
| FANCM-3F-1              | CAATCAAGCAATTCGTTCCACGTG                                                                     |
| FANCM-4F-1              | GTGGTATACATCTGCGTTAGATCA                                                                     |
| FANCM-2R-1              | CACCTTGGATGGCAATGTCTG                                                                        |
| FANCM-2R-2              | CTGGAAAGCTGGAGTCTCAGTG                                                                       |
| ppx1-F3                 | AGCAGGCAAATCACACAGGT                                                                         |
| ppx1-R3                 | TCCACAACAGCTGAAAGACTCA                                                                       |
| ppx2-F3                 | CCGGCAGATTACGCAGGTAT                                                                         |
| ppx2-R3                 | AGCCCTGATCTGGTCTAGAGT                                                                        |
| pp4r2-F5                | CGACCACGAGTGAGAGTGAG                                                                         |
| pp4r2-R5                | ACGTTGTAGGCAACCGTGAA                                                                         |
| GAPC-RTF1               | CGAGAAAGCTGCTACCTACGAT                                                                       |
| GAPC-RTR1               | GTTGTGCTACCATGACACCAAT                                                                       |
| ppx2-2 genotyping LP    | GGCAGATCAGGG TATTGATCG                                                                       |
| ppx2-2 genotyping RP    | AACGATGACCTTGCAATTTTG                                                                        |
| meiMIGS-PPX1-Lv0-AATG-F | CCGAAGACGGCTCAAATGGTGATTTTCTCTACAAGCGAAGCCCCGTGCTACTTTATGTGGTG<br>ACATCCATGGGCAGTTCTATGATATG |
| meiMIGS-PPX1-Lv0-ACCT-R | TTGTGGTCTCAACCTCACTGCCACCAAAAAGGAAT                                                          |
| meiMIGS-PPX2-Lv0-AGGT-F | TTGTGGTCTCAAGGTGTGATTTTTCTCTACAAGCGAACGAGGCTTTGAAGGAATCAG                                    |

|                           |                                                                                           |
|---------------------------|-------------------------------------------------------------------------------------------|
| meiMIGS-PPX2-Lv0-AAGC-R   | CCGAAGACGGCTCGAAGCCGACAAGAGCTGAAAGACTCAAGTAGTCAAAGATATC                                   |
| meiMIGS-PPX1-Lv0-AAGC-R   | CCGAAGACGGCTCGAAGCCACTGCCACCAAAAAGGAATCCGGCACCACGAGGGCTC                                  |
| meiMIGS-PPX2-Lv0-AATG-F   | CCGAAGACGGCTCAAATGGTGATTTTTCTCTACAAGCGAACGAGGCTTTGAAGGAATCAGAA<br>GTGAAGGCTCTTTGTCTTAAAGC |
| DMC1-1p_1.5kb-Lv0-GGAG-F  | CCGAAGACGGCTCAGGAGAAAGAAACCAAGTTCCATGTCCAT                                                |
| DMC1-1p_1.5kb-Lv0-CATT-R  | CCGAAGACGGCTCGCATTCCGATCACTGACACAAGCAAAAATAAA                                             |
| DMC1-qPCR-F               | TGAAGAAACGAGCCAGATGC                                                                      |
| DMC1-qPCR-R               | GCGTTTATACCTTGTCGATCA                                                                     |
| PPX1-qPCR-F               | AATGGGCAAACTTCGAAAA                                                                       |
| PPX1-qPCR-R               | CAACCCAGTTTCGATCAGTC                                                                      |
| PPX2-qPCR-F               | CCAAGAAACCTGCACCTGAT                                                                      |
| PPX2-qPCR-R               | TCTCTTTGGCAACACATGGA                                                                      |
| pGADT7-PPX1 CDS<br>GA F   | CGGGTGGGCATCGATACGGGATCCATGTCAGACCTAGATCGGCAA                                             |
| pGADT7-PPX1 CDS<br>GA R   | CAGTATCTACGATTCATCTGCAGGCCTTTATAGGAAGTAATCAGGGGCC                                         |
| pGBKT7-PPX1 CDS<br>GA F   | GGAGGCCGAATTCGCGGATCCATGTCAGACCTAGATCGGCAA                                                |
| pGBKT7-PPX1 CDS<br>GA R   | GGGGTTATGCTAGTTATGCAGGCCTTTATAGGAAGTAATCAGGGGCC                                           |
| pGADT7-PP4R2L GA<br>F     | CGGGTGGGCATCGATACGGATCCATGGAGAATCCGTCATCATCGG                                             |
| pGADT7-PP4R2L GA<br>R     | CAGTATCTACGATTCATCTGCAGGCCTTAGGCACACGTTGTAGGC                                             |
| pGADT7-PP4R3A GA<br>F     | CGGGTGGGCATCGATACGGATCCATGGGCGCTCCGAAAAGTC                                                |
| pGADT7-PP4R3A GA<br>R     | CAGTATCTACGATTCATCTGCAGGCCTTCAGGATCCATTTACAGCCATTTCC                                      |
| pGADT7-PP4R3A-N<br>GA R   | CAGTATCTACGATTCATCTGCAGGCCTTCAAATAAGTTTCAAGTTAGGC                                         |
| pGADT7-HEI10 CDS<br>GA F  | CGGGTGGGCATCGATACGGGATCCATGAGATGCAACGCGTGTTG                                              |
| pGADT7-HEI10 CDS<br>GA R  | CAGTATCTACGATTCATCTGCAGGCCTTATAGCGTGAACAGCTGAGG                                           |
| pGBKT7-HEI10 CDS<br>GA F  | GGAGGCCGAATTCGCGGATCCATGAGATGCAACGCGTGTTG                                                 |
| pGBKT7-HEI10 CDS<br>GA R  | GGGGTTATGCTAGTTATGCAGGCCTTATAGCGTGAACAGCTGAGG                                             |
| pGADT7-MSH5 CDS<br>GA F   | CGGGTGGGCATCGATACGGATCCATGGAGGAAATGGAAGACACTG                                             |
| pGADT7-MSH5 CDS<br>GA R   | CAGTATCTACGATTCATCTGCAGGCCTTAGGAAGTGAAGATATCTTGAAG                                        |
| MSH5 CDS-pGBKT7<br>GA F   | GGAGGCCGAATTCGCGGATCCATGGAGGAAATGGAAGACACTG                                               |
| MSH5 CDS-pGBKT7<br>GA R   | GGGGTTATGCTAGTTATGCAGGCCTTAGGAAGTGAAGATATCTTGAAG                                          |
| pGADT7-PTD CDS GA<br>F    | CGGGTGGGCATCGATACGGATCCATGGCGACGGCGGGATC                                                  |
| pGADT7-PTD CDS GA<br>R    | CAGTATCTACGATTCATCTGCAGGCCTCAGTTGAATTTGGGACTGAGG                                          |
| PTD CDS-pGBKT7 GA<br>F    | GGAGGCCGAATTCGCGGATCCATGGCGACGGCGGGATC                                                    |
| PTD CDS-pGBKT7 GA<br>R    | GGGGTTATGCTAGTTATGCAGGCCTCAGTTGAATTTGGGACTGAGG                                            |
| pGAD-SHOC1-C CDS<br>GA F  | CGGGTGGGCATCGATACGGATCCAGTCTCAAATGATAAAGGGAGAC                                            |
| pGAD-SHOC1-C CDS<br>GA R  | CAGTATCTACGATTCATCTGCAGGCCTTACTTGAGCTGTGTATCAGCAAA                                        |
| pGADT7-MER3 CDS<br>GA F-2 | CGGGTGGGCATCGATACGGATCCATGGATACACACACGCTCAAATCTGTCTCAGATTTG                               |
| pGADT7-MER3 CDS<br>GA R-2 | AGTATCTACGATTCATCTGCAGGCCTTCACAGAAAAGAGAAGATGCTTTTAAATCCAAG                               |
| pGADT7-ZIP4 CDS GA<br>F   | CGGGTGGGCATCGATACGGATCCATGAGAATCGCCGAGATCAC                                               |
| pGADT7-ZIP4 CDS GA<br>R   | CAGTATCTACGATTCATCTGCAGGCCTTAAGCAGAAGAACTTTGGTCT                                          |

|                               |                                                          |
|-------------------------------|----------------------------------------------------------|
| ZYP1a CDS-pGADT7<br>GA F      | CGGGTGGGCATCGATACGGATCCATGCAGAAGTTAGGGTTTCCGG            |
| ZYP1a CDS-pGADT7<br>GA R      | CAGTATCTACGATTCATCTGCAGGCCTTCAATCAAATGCATAGGGATCATCAGC   |
| pGADT7-MLH1 CDS<br>GA F       | CGGGTGGGCATCGATACGGATCCATGATCGACGATTCGTCTCTTAC           |
| pGADT7-MLH1 CDS<br>GA R       | CAGTATCTACGATTCATCTGCAGGCCTTTAGCATCGTTTCAATATCTTGTAC     |
| pGADT7-HEIP1 CDS<br>GA F      | CGGGTGGGCATCGATACGGGATCCATGCTGCAATGGATGGGAGG             |
| pGADT7-HEIP1 CDS<br>GA R      | CAGTATCTACGATTCATCTGCAGGCCTTAAAGTTTTAAAGAGTCAAGAAGC      |
| pGBKT7-ASY1 CDS<br>GA F       | GGAGGCCGAATTCCCGGGATCCATGGTGATGGCTCAGAAGCTG              |
| pGBKT7-ASY1 CDS<br>GA R       | GGGGTTATGCTAGTTATGCAGGCCTTCAATTAGCTTGAGATTCTGACG         |
| pGBKT7-ASY3 CDS<br>GA F       | GGAGGCCGAATTCCCGGGATCCATGAGCGACTATAGAAGCTTCG             |
| pGBKT7-ASY3 CDS<br>GA R       | GGGGTTATGCTAGTTATGCAGGCCTTCAATCATCCCTCAAACATTCTGC        |
| pGADT7-REC8 CDS<br>GA F       | CGGGTGGGCATCGATACGGATCCATGTTGAGACTGGAGAGTTTG             |
| pGADT7-REC8 CDS<br>GA R       | CAGTATCTACGATTCATCTGCAGGCCTTACATGTTGGGTCCTCTTGC          |
| SWI1 CDS-pGBKT7<br>GA F       | GGAGGCCGAATTCCCGGGATCCATGAGTAGTACGATGTTCTG               |
| SWI1 CDS-pGBKT7<br>GA R       | GGGGTTATGCTAGTTATGCAGGCCTTCAAACGTTGAAGAGATTCTTGG         |
| pGAD-SPO11-1 CDS<br>GA F      | CGGGTGGGCATCGATACGGATCCATGGAGGGAAAATTCGCTATTTCC          |
| pGAD-SPO11-1 CDS<br>GA R      | CAGTATCTACGATTCATCTGCAGGCCTTCAAGGAGAGCTTACTTCACGAC       |
| pGBK-MTOPVIB CDS<br>GA F      | GGAGGCCGAATTCCCGGGATCCATGGAAAACAATGCTCCGGTTCGG           |
| pGBK-MTOPVIB CDS<br>GA R      | GGGGTTATGCTAGTTATGCAGGCCTTATTCTCGCAGCATAGTCGC            |
| PRD2 CDS-pGBKT7<br>GA F       | GGAGGCCGAATTCCCGGGATCCATGAGTTCAAGCGTAGCTGAAG             |
| PRD2 CDS-pGBKT7<br>GA R       | GGGGTTATGCTAGTTATGCAGGCCTTCAATCTATTCTTGGTAGGCTAAG        |
| pGADT7-PRD3 CDS<br>GA F       | CGGGTGGGCATCGATACGGATCCATGAAGATGAATATTAACAAAGCCTG        |
| pGADT7-PRD3 CDS<br>GA R       | CAGTATCTACGATTCATCTGCAGGCCTTCAATTAATTATTATGGGGTTACCG     |
| pGADT7-PRD1-N<br>GA F         | CGGGTGGGCATCGATACGGATCCATGTTCTTCCAACACTCACAGTTG          |
| pGADT7-PRD1-N<br>GA R         | CAGTATCTACGATTCATCTGCAGGCCTTCAATGCGGCATAGTTGTCTCC        |
| pGADT7-RPA1A<br>GA F          | CGGGTGGGCATCGATACGGATCCATGCCGGTGAGTTTGACTCC              |
| pGADT7-RPA1A<br>GA R          | CAGTATCTACGATTCATCTGCAGGCCTTCACTTACGAGCAAATCAAGCATG      |
| RAD51 CDS pGADT7<br>GA F      | CGGGTGGGCATCGATACGGATCCATGACGACGATGGAGCAGC               |
| RAD51 CDS pGADT7<br>GA R      | CAGTATCTACGATTCATCTGCAGGCCTTCAATCCTTGCAATCTGTTACACCTTCTG |
| pGADT7-CDKA;1 CDS<br>GA F     | CGGGTGGGCATCGATACGGATCCATGGATCAGTACGAGAAAGTTG            |
| pGADT7-CDKA;1 CDS<br>GA R     | CAGTATCTACGATTCATCTGCAGGCCTTAAAGCATGCCTCCAAGA            |
| pGADT7-DMC1 CDS<br>GA F       | CGGGTGGGCATCGATACGGATCCATGATGGCTTCTCTTAAAGCTGAA          |
| pGADT7-DMC1 CDS<br>GA R       | CAGTATCTACGATTCATCTGCAGGCCTTAAATCCTTCGCGTCAGCAATG        |
| PPX1 CDS1-Lv0-<br>AATG-F      | CCGAAGACGGCTCAAATGATGTCAGACCTAGATCGGCAAATAGGGCAGC        |
| PPX1 CDS1ns-Lv0-<br>TTCG-R    | CCGAAGACGGCTCGCGAACCTAGGAAGTAATCAGGGGCCGGCTTTTTGGCGGG    |
| HEI10 CDS1-Lv0-<br>AATG-F     | CCCGAAGACGGCTCAAATGATGAGATGCAACGCGTGTGGA                 |
| HEI10 CDS1ns-Lv0-<br>ggTTCG-R | CCGAAGACGGCTCGCGAACCTAGCGTGAACAGCTGAGGGCCGGGAA           |
| HEI10 CDS OL F1               | GAACAGAGAAACCATTCGCAA                                    |



|                           |                                                  |
|---------------------------|--------------------------------------------------|
| HEI10 CDS OL R1           | TTGCGAATGGTTTCTCTGTTC                            |
| MSH5 CDS1-Lv0-AATG-F      | CCGAAGACGGCTCAAATGATGGAGGAAATGGAGGACACTG         |
| MSH5 CDS1ns-Lv0-ggTTCG-R  | CCGAAGACGGCTCGCGAACCGGAAGTGAAGATATCTTGAAAG       |
| MSH5 CDS OL F1            | CGTGTTAGTGGTGGACTTCTTGCTATATT                    |
| MSH5 CDS OL R1            | AATATAGCAAGAAGTCCACCACTAACACG                    |
| MSH5 CDS OL F2            | AAGCTGGTTTATGAAACCAATTTAGATC                     |
| MSH5 CDS OL R2            | GATCTAAAATTGGTTTCATAAACCCAGCTT                   |
| MSH5 CDS OL F3            | TACCATACCTCGAAAACACGAGAGTTAGA                    |
| MSH5 CDS OL R3            | TCTAACTCTCGTGTTCGAGGTATGGTA                      |
| PTD CDS1-Lv0-AATG-F       | CCGAAGACGGCTCAAATGATGGCGACGGCGGGATCA             |
| PTD CDS1ns-Lv0-ggTTCG-R-2 | CCGAAGACGGCTCGCGAACCTCAGTTGAATTTGGGACTGAG        |
| PTD ORF OL F1             | TCTATCGCAAACCTCCTATATGTGTTCTGA                   |
| PTD ORF OL R1             | TCAGAACACATATAGGAGTTTGCGATAGA                    |
| PTD ORF OL F2             | TTACTTCCAGTGAGTGGTGTCTACTCTT                     |
| PTD ORF OL R2             | AAGAGTAGAACACCACTCACTGGAAGTAA                    |
| PTD ORF OL F3-2           | GAAGCAATCGCTAAAGCATCCAAAGAGGACATTTAGCAAACACAG    |
| PTD ORF OL R3             | TTTGCTAAAATGTCCTCTTTGGATGCTTT                    |
| eYFP CT-Lv0-TTCG-F        | CCGAAGACGGCTCATTGATGGTGAGCAAGGGCGAGGAGCTGTTCCACC |
| eYFP CT-Lv0-GCTT-R        | CCGAAGACGGCTCGAAGCTCATGATCTAATAGCCGCGTNTTGTACAG  |
| eCFP CT-Lv0-TTCG-F        | AAGAAGACAACCTCATTGCGTGAGCAAGGGCGAG               |
| eCFP CT-Lv0-GCTT-R        | CCGAAGACAACCTCGAAGCTTACTTGTACAGCTCGT             |
| Lv0-seq_F                 | GGGAAACGCCTGGTATCTTT                             |
| Lv0-seq_R                 | GGTCAAGGTTCTGGACCAGTTGCCGTG                      |
| PP4R3A seq F1             | CTATGGATGCTTTGGGATTAGC                           |
| MSH5 seq (1) F-2          | GCCGTCTCAATGCTATTCC                              |
| MER3 CDS seq (1) F        | GAAAAGCGCCTCCAAAATA                              |
| MER3 CDS seq (2) F        | CAGCTCAGACGCAATGAGAA                             |
| ZIP4 seq (1) F-2          | CATTACCTGTGTTGGCGATG                             |
| ZYP1a CDS seq R           | GAATGGTCAGCAGTTGCCTC                             |
| MLH1 CDS seq (1) F        | TCCTCTGTGACTCCTCTGG                              |
| ASY3 CDS seq (1) F        | AGGGTAGGAGCCAAAGGTGT                             |
| RPA1A seq F1              | ATTGTGGTGTCTGAACATGGAG                           |
| RAD51 SEQ F               | GCTAGTTCCTCTGGGGTTCA                             |

## Supplementary References

1. van Tol, N., Rolloos, M., van Loon, P. & van der Zaal, B. J. MeioSeed: a CellProfiler-based program to count fluorescent seeds for crossover frequency analysis in *Arabidopsis thaliana*. *Plant Methods* **14**, 32 (2018).
2. Carpenter, A. E. *et al.* CellProfiler: image analysis software for identifying and quantifying cell phenotypes. *Genome Biol.* **7**, R100 (2006).
3. Melamed-Bessudo, C., Yehuda, E., Stuitje, A. R. & Levy, A. A. A new seed-based assay for meiotic recombination in *Arabidopsis thaliana*. *Plant J.* **43**, 458–66 (2005).
4. Ziolkowski, P. A. *et al.* Juxtaposition of heterozygosity and homozygosity during meiosis causes reciprocal crossover remodeling via interference. *Elife* **2015**, (2015).
5. Schneeberger, K. *et al.* SHOREmap: Simultaneous mapping and mutation identification by deep sequencing. *Nature Methods* vol. 6 550–551 (2009).
6. Sun, H. & Schneeberger, K. Shoremap v3.0: Fast and accurate identification of causal mutations from forward genetic screens. *Methods Mol. Biol.* **1284**, 381–395 (2015).
7. Wu, G., Rossivito, G., Hu, T., Berlyand, Y. & Poethig, R. S. Traffic lines: new tools for genetic analysis in *Arabidopsis thaliana*. *Genetics* **200**, 35–45 (2015).
8. Berchowitz, L. E. & Copenhaver, G. P. Fluorescent *Arabidopsis* tetrads: a visual assay for quickly developing large crossover and crossover interference data sets. *Nat. Protoc.* **3**, 41–50 (2008).
9. Lim, E. C. *et al.* DeepTetrad: high-throughput image analysis of meiotic tetrads by deep learning in *Arabidopsis thaliana*. *Plant J.* **101**, 473–483 (2020).
10. Perkins, D. D. Crossing-over and interference in a multiply marked chromosome arm of *Neurospora*. *Genetics* **47**, 1253–74 (1962).
11. Xue, Y. *et al.* GPS 2.1: Enhanced prediction of kinase-specific phosphorylation sites with an algorithm of motif length selection. *Protein Eng. Des. Sel.* **24**, 255–260 (2011).
