# Supplementary material
Source: PubMed Central journal article supplement (PMC7610654)

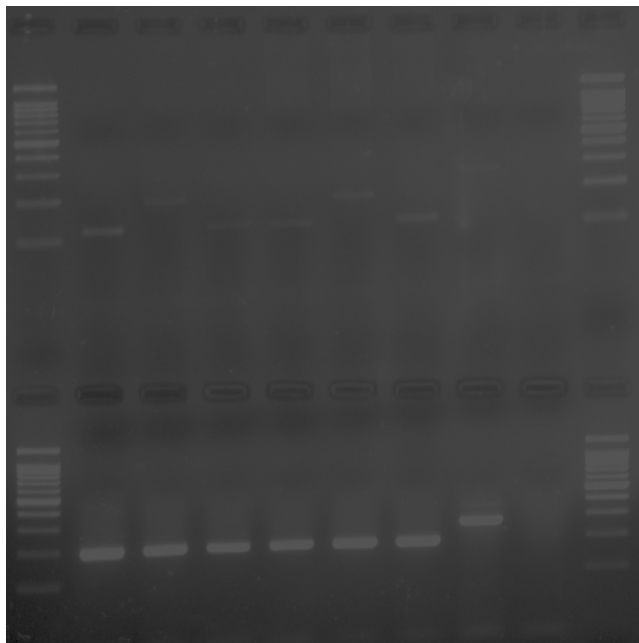

*PPX1* F3R3 splice junction primer  
28 cycles

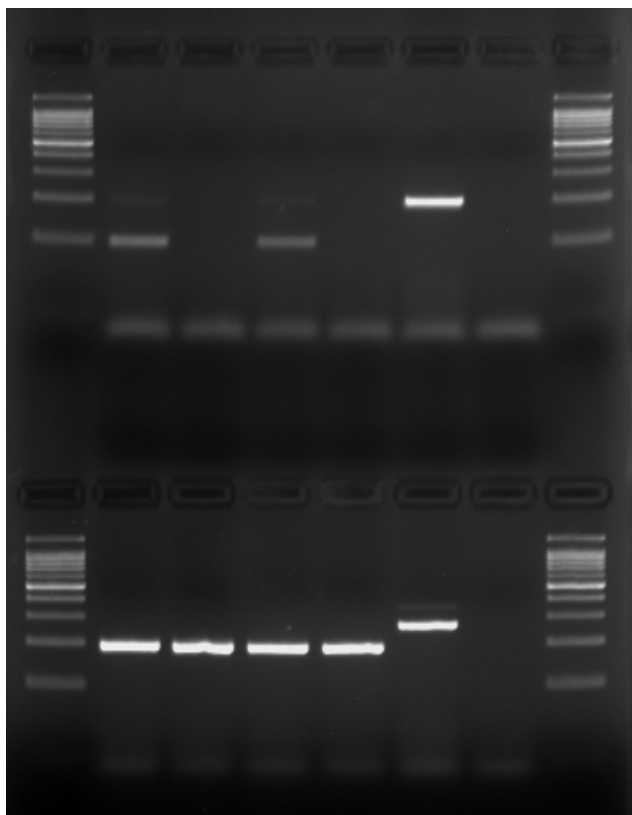

*PPX2* F3R3 intron spanning  
28 cycles

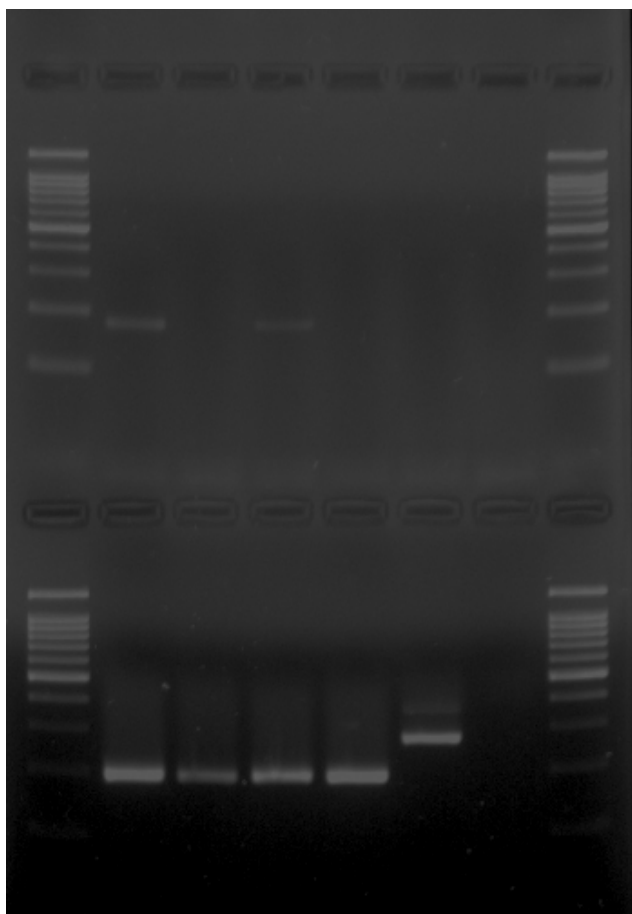

*PP4R2* F5R5 spanning exon 7  
28 cycles

Supplement: EMS117643-supplement-Source_data_for_Extended_Figure_3b.pdf [file EMS117643-supplement-Source_data_for_Extended_Figure_3b.pdf]

|          | INPUT |   | IP: Myc |   | INPUT |   | IP: Myc |   | INPUT |   | IP: Myc |   | INPUT |   | IP: Myc |   |
|----------|-------|---|---------|---|-------|---|---------|---|-------|---|---------|---|-------|---|---------|---|
| PPX1-Myc | -     | + | -       | + | -     | + | -       | + | -     | + | -       | + | -     | + | -       | + |
| PTD-HA   | +     | + | +       | + | -     | - | -       | - | -     | - | -       | - | -     | - | -       | - |
| HEI10-HA | -     | - | -       | - | +     | + | +       | + | -     | - | -       | - | -     | - | -       | - |
| MSH5-HA  | -     | - | -       | - | -     | - | -       | - | +     | + | +       | + | -     | - | -       | - |
| MLH1-HA  | -     | - | -       | - | -     | - | -       | - | -     | - | -       | - | +     | + | +       | + |

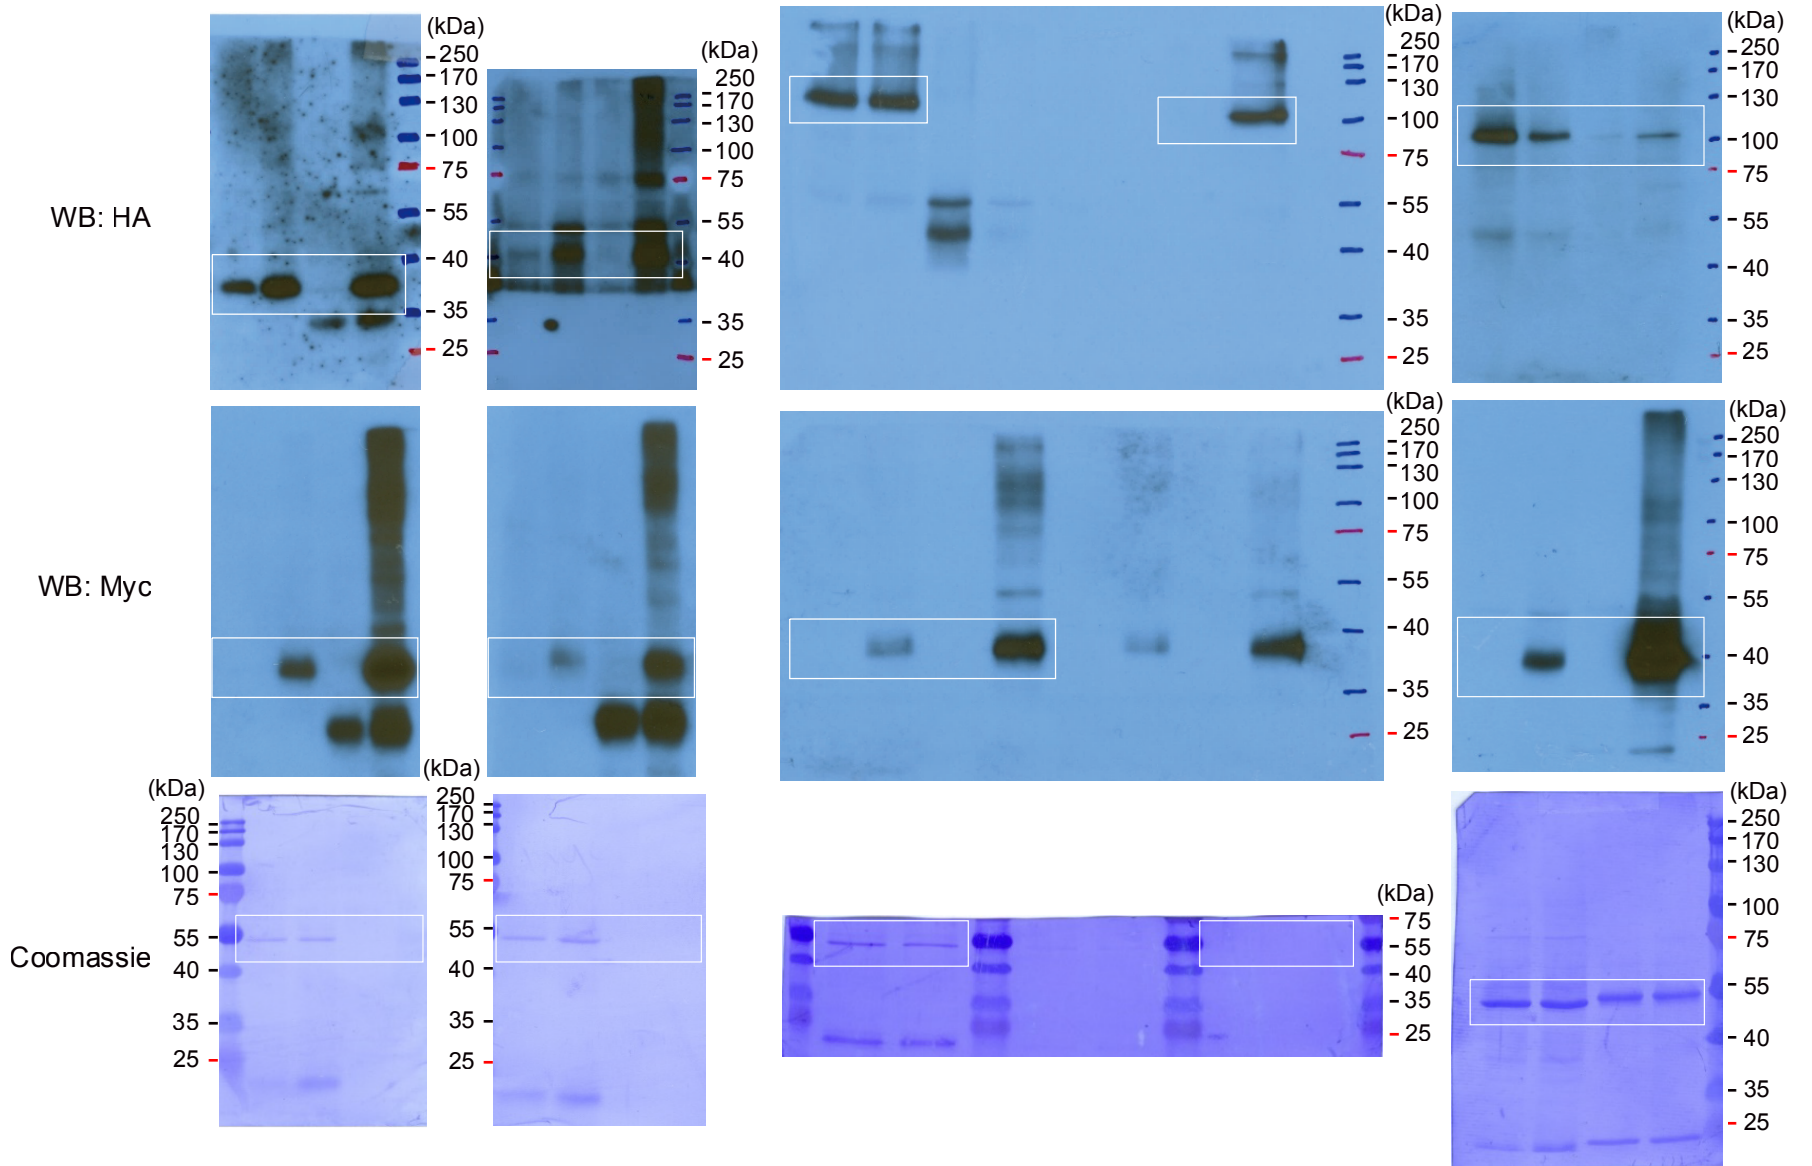

Supplement: EMS117643-supplement-Source_data_for_Figure_6f.pdf [file EMS117643-supplement-Source_data_for_Figure_6f.pdf]
